*Control acute agitation with*

# **GEODON**<sup>®</sup>

*for Injection* (ziprasidone mesylate)

*In schizophrenia...*

## **Rapid improvement with low EPS<sup>1,2</sup>**

- Significant control achieved between 15 and 30 minutes\* after injection<sup>1,3</sup>
- Proven advantages over haloperidol IM
  - twice the improvement as measured on the BPRS<sup>4†</sup>
  - significantly lower incidence of movement disorders<sup>2‡</sup>
- Smooth transition, with continued improvement, from IM to oral therapy<sup>2,4</sup>
- May be used concomitantly with benzodiazepines

\* In 2 pivotal studies vs control, significance was achieved at 15 minutes (with 10 mg dose) and 30 minutes (with 20 mg dose), respectively.

† In a 7-day, open-label IM-to-oral transition study.

‡ In a 6-week, open-label IM-to-oral transition study.

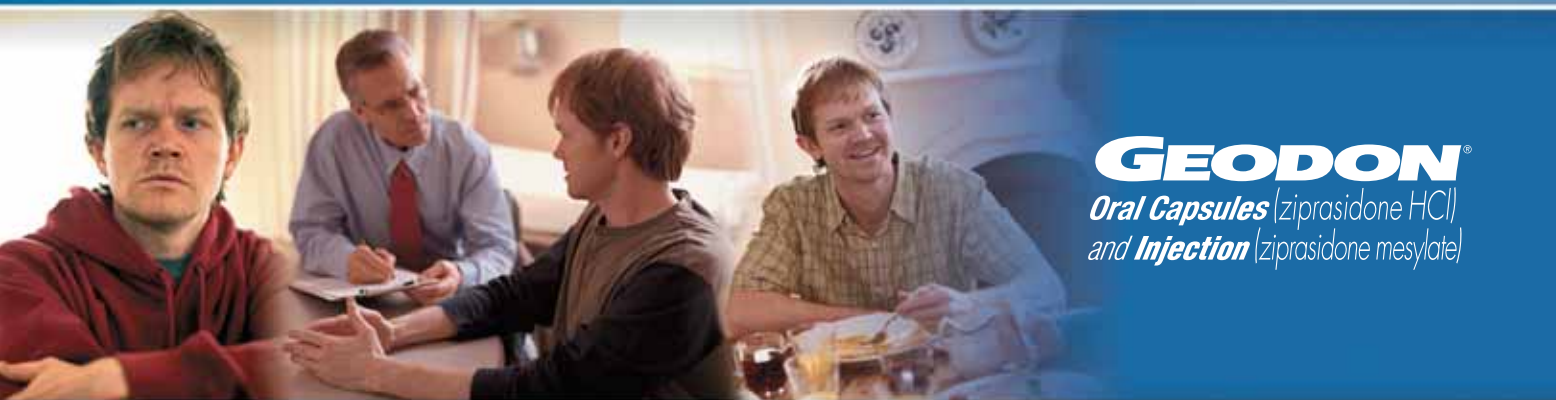

**GEODON**<sup>®</sup>  
*Oral Capsules* (ziprasidone HCl)  
*and Injection* (ziprasidone mesylate)

Elderly patients with dementia-related psychosis treated with atypical antipsychotic drugs are at an increased risk of death compared to placebo. GEODON is not approved for the treatment of patients with dementia-related psychosis.

GEODON is contraindicated in patients with a known history of QT prolongation, recent acute myocardial infarction, or uncompensated heart failure, and should not be used with other QT-prolonging drugs. GEODON has a greater capacity to prolong the QT<sub>c</sub> interval than several antipsychotics. In some drugs, QT prolongation has been associated with torsade de pointes, a potentially fatal arrhythmia. In many cases this would lead to the conclusion that other drugs should be tried first.

In fixed-dose, pivotal studies, the most commonly observed adverse events associated with the use of GEODON for Injection (incidence ≥5%) and observed at a rate in the higher GEODON dose groups (10 mg, 20 mg) of at least twice that of the lowest GEODON dose group (2 mg control) were somnolence (20%), headache (13%), and nausea (12%).

Please see brief summary of prescribing information on adjacent page.

**PRESENTED AT THE APA  
2007 ANNUAL MEETING  
IN SAN DIEGO, CA**

Tuesday, May 22, 2007 ♦ 7:00–10:00 pm  
San Diego Convention Center Ballroom 20, Upper Level

# Cigarette Smoking, Smoking Cessation, AND Psychiatric Illness

## **PROGRAM AGENDA**

6:30–7:00 pm

### **Dinner**

7:00–7:10 pm

### **Introduction**

*Alexander H. Glassman, MD  
(Chair)*

Columbia University College  
of Physicians and Surgeons  
New York State Psychiatric  
Institute

7:10–7:35 pm

### **Reward Systems Underlying Motivation and Addiction**

*Peter W. Kalivas, PhD*  
Medical University of  
South Carolina

7:35–8:00 pm

### **Animal Modeling and Integrative Neurocircuitry of Addiction Vulnerability in Mental Illness**

*R. Andrew Chambers, MD*  
Indiana University School  
of Medicine

8:00–8:25 pm

### **What Makes Smoking Cessation Unique in Patients with a History of Depression?**

*Alexander H. Glassman, MD*  
Columbia University College  
of Physicians and Surgeons  
New York State Psychiatric  
Institute

8:25–8:50 pm

### **Pharmacological Treatment of Nicotine Dependence in Schizophrenia: The Devil Is in the Details**

*Tony P. George, MD, FRCPC*  
University of Toronto  
Centre for Addiction  
and Mental Health

8:50–9:15 pm

### **Pharmacotherapies for Smoking Cessation**

*Cheryl Oncken, MD, MPH*  
University of Connecticut  
Health Center

9:15–10:00 pm

### **Panel Discussion/Q&A**

## **LEARNING OBJECTIVES**

At the conclusion of this symposium, the participant should be able to:

- Recognize the unique risks of cigarette smoking for patients with psychiatric illness.
- Discuss common neurobiology underlying all addictions.
- Compare and contrast smoking addiction in patients with depression and schizophrenia.
- Outline tools and treatments for smoking cessation in patients with and without psychiatric illness.

Supported by an educational  
grant from

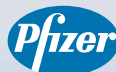

Sponsored by the American  
Psychiatric Association

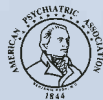

## **REGISTRATION**

Attendees must be registered for the APA Annual Meeting to attend this symposium. Seating is limited and will be based on first-come, first-served. For more information about the meeting, please visit the APA website at [www.psych.org](http://www.psych.org) or contact the APA toll-free at 1-888-357-7924 (within the U.S. or Canada) or 703-907-7300.

## **CREDIT DESIGNATION**

The APA designates this educational activity for a maximum of 3 *AMA PRA Category 1 Credits™*. Physicians should only claim credit commensurate with the extent of their participation in the activity.

## **ACCREDITATION STATEMENT**

The American Psychiatric Association (APA) is accredited by the Accreditation Council for Continuing Medical Education to provide continuing medical education for physicians.

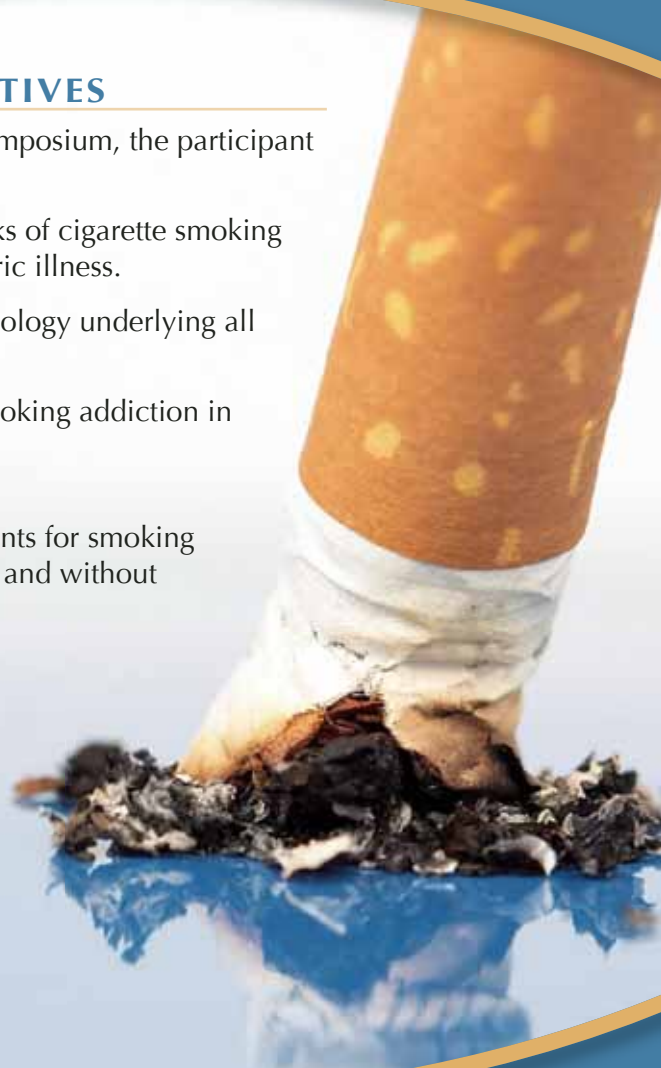

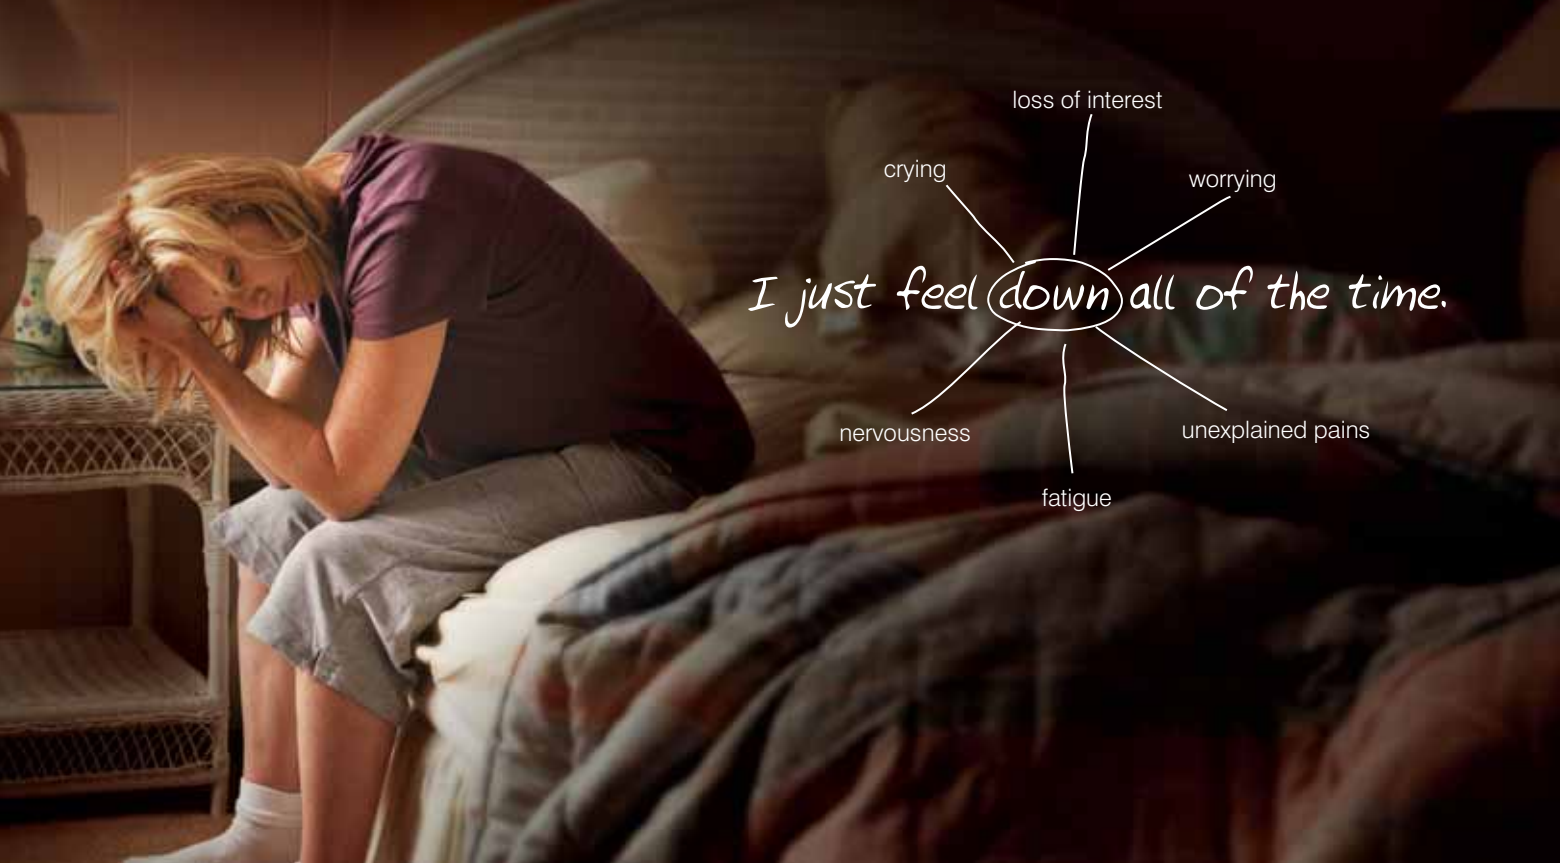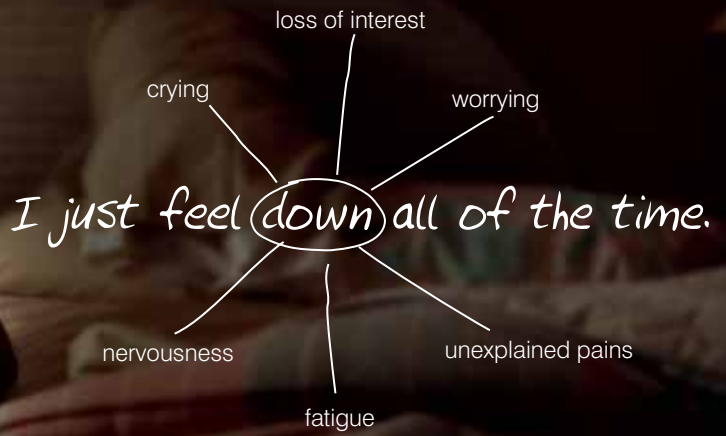

**Treat the symptoms of depression your patients talk about, and those they don't.** When patients don't express all their symptoms to you, it can make treating depression to remission more complex. Cymbalta treats the emotional, anxious, and painful somatic symptoms of depression.<sup>1a-c, 2\*</sup> Cymbalta also offers high rates of remission, so patients can feel more like themselves again.<sup>1d†</sup> To learn more about treating beyond the obvious, visit [www.insidecymbalta.com](http://www.insidecymbalta.com)

\*Cymbalta 60 mg/day vs placebo ( $P \leq .05$ ) by MMRM for major depressive disorder (MDD) on mean change in HAM-D<sub>17</sub> Total Score, Maier Subscale, Psychic Anxiety, and Visual Analog Scale.

MMRM=Mixed-effects Models Repeated Measures analysis

† Remission=HAM-D<sub>17</sub> Total Score  $\leq 7$ , 43% vs 27% placebo,  $P \leq .001$ .

References: 1. Data on file, Lilly Research Laboratories: a: CYM20060101A; b: CYM20060101B; c: CYM20050315S; d: CYM20060101C.  
2. Fava M, et al. *J Clin Psychiatry*. 2004;65(4):521-530.

treat beyond the obvious

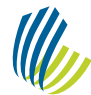

**Cymbalta**<sup>®</sup> DELAYED RELEASE CAPSULES  
duloxetine HCl

### Important Safety Information

- **Antidepressants increased the risk of suicidal thinking and behavior (suicidality) in short-term studies in children and adolescents with major depressive disorder (MDD) and other psychiatric disorders.**
- **Patients started on therapy should be observed closely for clinical worsening, suicidality, or unusual changes in behavior.**
- **Cymbalta is not approved for use in pediatric patients.**

Cymbalta should not be used concomitantly with monoamine oxidase inhibitors (MAOIs) or thioridazine and not in patients with a known hypersensitivity or with uncontrolled narrow-angle glaucoma.

**Clinical worsening and suicide risk: All adult and pediatric patients being treated with an antidepressant for any indication should be observed closely for clinical worsening, suicidality, and unusual changes in behavior, especially when initiating drug therapy and when increasing or decreasing the dose.** A health professional should be immediately notified if the depression is persistently worse or there are symptoms that are severe, sudden, or were not part of the patient's presentation. If discontinuing treatment, taper the medication.

Development of a potentially life-threatening serotonin syndrome may occur with SNRIs and SSRIs, including Cymbalta treatment, particularly with

concomitant use of serotonergic drugs, including triptans. Concomitant use is not recommended.

Cymbalta should not be administered to patients with any hepatic insufficiency or patients with end-stage renal disease (requiring dialysis) or severe renal impairment (CrCl <30 mL/min).

Postmarketing, severe elevations of liver enzymes or liver injury with a hepatocellular, cholestatic, or mixed pattern have been reported.

Cymbalta should generally not be prescribed to patients with substantial alcohol use or evidence of chronic liver disease.

Cases of orthostatic hypotension and/or syncope as well as cases of hyponatremia have been reported.

Most common adverse events ( $\geq 5\%$  and at least twice placebo) in MDD premarketing clinical trials were: nausea, dry mouth, constipation, fatigue, decreased appetite, somnolence, and increased sweating. Most common adverse events in diabetic peripheral neuropathic pain (DPNP) premarketing clinical trials were: nausea, somnolence, dizziness, constipation, dry mouth, increased sweating, decreased appetite, and asthenia.

See Brief Summary of full Prescribing Information, including Boxed Warning, on adjacent page.

DD42861 1106 PRINTED IN USA © 2006, ELI LILLY AND COMPANY. ALL RIGHTS RESERVED. Cymbalta is a registered trademark of Eli Lilly and Company.

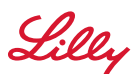

# CYMBALTA®

## (duloxetine hydrochloride) Delayed-release Capsules

Brief Summary: Consult the package insert for complete prescribing information.

### WARNING

**Suicidality in Children and Adolescents—Antidepressants increased the risk of suicidal thinking and behavior (suicidality) in short-term studies in children and adolescents with major depressive disorder (MDD) and other psychiatric disorders. Anyone considering the use of Cymbalta or any other antidepressant in a child or adolescent must balance this risk with the clinical need. Patients who are started on therapy should be observed closely for clinical worsening, suicidality, or unusual changes in behavior. Families and caregivers should be advised of the need for close observation and communication with the prescriber. Cymbalta is not approved for use in pediatric patients. (See WARNINGS and PRECAUTIONS, Pediatric Use.)**

**Poolled analyses of short-term (4 to 16 weeks) placebo-controlled trials of 9 antidepressant drugs (SSRIs and others) in children and adolescents with major depressive disorder (MDD), obsessive compulsive disorder (OCD), or other psychiatric disorders (a total of 24 trials involving over 4400 patients) have revealed a greater risk of adverse events representing suicidal thinking or behavior (suicidality) during the first few months of treatment in those receiving antidepressants. The average risk of such events in patients receiving antidepressants was 4%, twice the placebo risk of 2%. No suicides occurred in these trials.**

**INDICATIONS AND USAGE:** Cymbalta is indicated for the treatment of major depressive disorder (MDD). Cymbalta is indicated for the management of neuropathic pain associated with diabetic peripheral neuropathy (DPN).

**CONTRAINDICATIONS: Hypersensitivity**—Known hypersensitivity to duloxetine or any of the inactive ingredients. **Monoamine Oxidase Inhibitors (MAOIs)**—Concomitant use with Cymbalta is contraindicated (see WARNINGS). **Uncontrolled Narrow-Angle Glaucoma**—In clinical trials, Cymbalta use was associated with an increased risk of mydriasis; therefore, its use is not recommended in patients with uncontrolled narrow-angle glaucoma.

**WARNINGS: Clinical Worsening and Suicide Risk**—Patients with MDD, both adult and pediatric, may experience worsening of their depression and/or the emergence of suicidal ideation and behavior (suicidality) or unusual changes in behavior, whether or not they are taking antidepressant medications, and this risk may persist until significant remission occurs. There has been a long-standing concern that antidepressants may have a role in inducing worsening of depression and the emergence of suicidality in certain patients. Antidepressants increased the risk of suicidal thinking and behavior (suicidality) in short-term studies in children and adolescents with MDD and other psychiatric disorders.

Poolled analyses of short-term placebo-controlled trials of 9 antidepressant drugs (SSRIs and others) in children and adolescents with MDD, OCD, or other psychiatric disorders (a total of 24 trials involving over 4400 patients) have revealed a greater risk of adverse events representing suicidal behavior or thinking (suicidality) during the first few months of treatment in those receiving antidepressants. The average risk of such events in patients receiving antidepressants was 4%, twice the placebo risk of 2%. There was considerable variation in risk among drugs, but a tendency toward an increase for almost all drugs studied. The risk of suicidality was most consistently observed in the MDD trials, but there were signals of risk arising from some trials in other psychiatric indications (obsessive compulsive disorder and social anxiety disorder) as well. **No suicides occurred in any of these trials.** It is unknown whether the suicidality risk in pediatric patients extends to longer-term use, ie, beyond several months. It is also unknown whether the suicidality risk extends to adults.

**All pediatric patients being treated with antidepressants for any indication should be observed closely for clinical worsening, suicidality, and unusual changes in behavior, especially during the initial few months of a course of drug therapy, or at times of dose changes, either increases or decreases. Such observation would generally include at least weekly face-to-face contact with patients or their family members or caregivers during the first 4 weeks of treatment, then every other week visits for the next 4 weeks, then at 12 weeks, and as clinically indicated beyond 12 weeks. Additional contact by telephone may be appropriate between face to face visits.**

**Adults with MDD or co-morbid depression in the setting of other psychiatric illness being treated with antidepressants should be observed similarly for clinical worsening and suicidality, especially during the initial few months of a course of drug therapy, or at times of dose changes, either increases or decreases.**

The following symptoms, anxiety, agitation, panic attacks, insomnia, irritability, hostility, aggressiveness, impulsivity, akathisia (psychomotor restlessness), hypomania, and mania, have been reported in adult and pediatric patients being treated with antidepressants for MDD as well as for other indications, both psychiatric and nonpsychiatric. Although a causal link between the emergence of such symptoms and either the worsening of depression and/or the emergence of suicidal impulses has not been established, there is concern that such symptoms may represent precursors to emerging suicidality.

Consideration should be given to changing the therapeutic regimen, including possibly discontinuing the medication, in patients whose depression is persistently worse, or who are experiencing emergent suicidality or symptoms that might be precursors to worsening depression or suicidality, especially if these symptoms are severe, abrupt in onset, or were not part of the patient's presenting symptoms.

If the decision has been made to discontinue treatment, medication should be tapered, as rapidly as is feasible, but with recognition that abrupt discontinuation can be associated with certain symptoms (see PRECAUTIONS, Discontinuation of Treatment with Cymbalta).

**Families and caregivers of pediatric patients being treated with antidepressants for major depressive disorder or other indications, both psychiatric and nonpsychiatric, should be alerted about the need to monitor patients for the emergence of agitation, irritability, unusual changes in behavior, and the other symptoms described above, as well as the emergence of suicidality, and to report such symptoms immediately to health care providers. Such monitoring should include daily observation by families and caregivers.** Prescriptions for Cymbalta should be written for the smallest quantity of capsules consistent with good patient management, in order to reduce the risk of overdose. Families and caregivers of adults being treated for depression should be similarly advised.

**Screening Patients for Bipolar Disorder**—A major depressive episode may be the initial presentation of bipolar disorder. It is generally believed (though not established in controlled trials) that treating such an episode with an antidepressant alone may increase the likelihood of precipitation of a mixed/manic episode in patients at risk for bipolar disorder. Whether any of the symptoms described above represent such a conversion is unknown. However, prior to initiating treatment with an antidepressant, patients with depressive symptoms should be adequately screened to determine if they are at risk for bipolar disorder; such screening should include a detailed psychiatric history, including a family history of suicide, bipolar disorder, and depression. It should be noted that Cymbalta is not approved for use in treating bipolar depression.

**MAOIs**—In patients receiving a serotonin reuptake inhibitor (SSRI) in combination with an MAOI, there have been reports of serious, sometimes fatal, reactions including hyperthermia, rigidity, myoclonus, autonomic instability with possible rapid fluctuations of vital signs, and mental status changes that include extreme agitation progressing to delirium and coma. These reactions have also been reported in patients who have recently discontinued SSRIs and are then started on an MAOI. Some cases presented with features resembling neuroleptic malignant syndrome. The effects of combined use of Cymbalta and MAOIs have not been evaluated in humans or animals. Therefore, because Cymbalta is an inhibitor of both serotonin and norepinephrine reuptake, it is recommended that Cymbalta not be used in combination with an MAOI, or within at least 14 days of discontinuing treatment with an MAOI. Based on the half-life of Cymbalta, at least 5 days should be allowed after stopping Cymbalta before starting an MAOI.

**Serotonin Syndrome**—The development of a potentially life-threatening serotonin syndrome may occur with SNRIs and SSRIs, including Cymbalta treatment, particularly with concomitant use of serotonergic drugs (including triptans) and with drugs which impair metabolism of serotonin (including MAOIs). Serotonin syndrome symptoms may include mental status changes (eg, agitation, hallucinations, coma), autonomic instability (eg, tachycardia, labile blood pressure, hyperthermia), neuromuscular aberrations (eg, hyperreflexia, incoordination) and/or gastrointestinal symptoms (eg, nausea, vomiting, diarrhea).

The concomitant use of Cymbalta with MAOIs intended to treat depression is contraindicated (see CONTRAINDICATIONS and WARNINGS).

If concomitant treatment of Cymbalta with a 5-hydroxytryptamine receptor agonist (triptan) is clinically warranted, careful observation of the patient is advised, particularly during treatment initiation and dose increases (see PRECAUTIONS, Drug Interactions).

The concomitant use of Cymbalta with serotonin precursors (such as tryptophan) is not recommended (see PRECAUTIONS, Drug Interactions).

**PRECAUTIONS: General**—**Hepatotoxicity**—Cymbalta increases the risk of elevation of serum transaminase levels. Liver transaminase elevations resulted in the discontinuation of 0.4% (31/8454) of Cymbalta-treated patients. In these patients, the median time to detection of the transaminase elevation was about two months. In controlled trials in MDD, elevations of alanine transaminase (ALT) to >3 times the upper limit of normal occurred in 0.9% (8/930) of Cymbalta-treated patients and

in 0.3% (2/652) of placebo-treated patients. In controlled trials in DPN, elevations of ALT to >3 times the upper limit of normal occurred in 1.68% (8/477) of Cymbalta-treated patients and in 0% (0/187) of placebo-treated patients. In the full cohort of placebo-controlled trials in any indication, 1% (39/3732) of Cymbalta-treated patients had a >3 times the upper limit of normal elevation of ALT compared to 0.2% (6/2568) of placebo-treated patients. In placebo-controlled studies using a fixed-dose design, there was evidence of a dose-response relationship for ALT and AST elevation of >3 times the upper limit of normal and >5 times the upper limit of normal, respectively. Postmarketing reports have described cases of hepatitis with abdominal pain, hepatomegaly and elevation of transaminase levels to more than twenty times the upper limit of normal with or without jaundice, reflecting a mixed or hepatocellular pattern of liver injury. Cases of cholestatic jaundice with minimal elevation of transaminase levels have also been reported.

The combination of transaminase elevations and elevated bilirubin, without evidence of obstruction, is generally recognized as an important predictor of severe liver injury. In clinical trials, three Cymbalta patients had elevations of transaminases and bilirubin, but also had elevation of alkaline phosphatase, suggesting an obstructive process; in these patients, there was evidence of heavy alcohol use and this may have contributed to the abnormalities seen. Two placebo-treated patients also had transaminase elevations with elevated bilirubin. Postmarketing reports indicate that elevated transaminases, bilirubin and alkaline phosphatase have occurred in patients with chronic liver disease or cirrhosis. Because it is possible that duloxetine and alcohol may interact to cause liver injury or that duloxetine may aggravate pre-existing liver disease, Cymbalta should ordinarily not be prescribed to patients with substantial alcohol use or evidence of chronic liver disease. **Orthostatic Hypotension and Syncope**—Orthostatic hypotension and syncope have been reported with therapeutic doses of duloxetine. Syncope and orthostatic hypotension tend to occur within the first week of therapy but can occur at any time during duloxetine treatment, particularly after dose increases. The risk of blood pressure decreases may be greater in patients taking concomitant medications that induce orthostatic hypotension (such as antihypertensives) or are potent CYP1A2 inhibitors (see CLINICAL PHARMACOLOGY, Drug-Drug Interactions, and PRECAUTIONS, Drug Interactions) and in patients taking duloxetine at doses above 60 mg daily. Consideration should be given to discontinuing duloxetine in patients who experience symptomatic orthostatic hypotension and/or syncope during duloxetine therapy. **Effect on Blood Pressure**—In MDD clinical trials, Cymbalta treatment was associated with mean increases in blood pressure, averaging 2 mm Hg systolic and 0.5 mm Hg diastolic and an increase in the incidence of at least one measurement of systolic blood pressure over 140 mm Hg compared to placebo. In a clinical pharmacology study designed to evaluate the effects of duloxetine on various parameters, including blood pressure at supratherapeutic doses with an accelerated dose titration, there was evidence of increases in supine blood pressure at doses up to 200 mg BID. At the highest 200 mg BID dose, the increase in mean pulse rate was 5.0-6.8 bpm and increases in mean blood pressure were 4.7-6.8 mm Hg (systolic) and 4.5-7 mm Hg (diastolic) up to 12 hours after dosing. Blood pressure should be measured prior to initiating treatment and periodically measured throughout treatment (see ADVERSE REACTIONS, Vital Sign Changes). **Activation of Mania/Hypomania**—In placebo-controlled trials in patients with MDD, activation of mania or hypomania was reported in 0.1% (1/1139) of Cymbalta-treated patients and 0.1% (1/777) of placebo-treated patients. Activation of mania/hypomania has been reported in a small proportion of patients with mood disorders who were treated with other marketed drugs effective in the treatment of MDD. As with these other agents, Cymbalta should be used cautiously in patients with a history of mania. **Seizures**—Cymbalta has not been systematically evaluated in patients with a seizure disorder, and such patients were excluded from clinical studies. In placebo-controlled clinical trials in patients with MDD, seizures occurred in 0.1% (1/1139) of Cymbalta-treated patients and 0% (0/777) of placebo treated patients. In placebo-controlled clinical trials in patients with diabetic peripheral neuropathy, seizures did not occur in any patients treated with either Cymbalta or placebo. Cymbalta should be prescribed with care in patients with a history of a seizure disorder. **Hyponatremia**—Cases of hyponatremia (some with serum sodium lower than 110 mmol/L) have been reported and appeared to be reversible when Cymbalta was discontinued. Some cases were possibly due to the syndrome of inappropriate antidiuretic hormone secretion (SIADH). The majority of these occurrences have been in elderly individuals, some in patients taking diuretics or who were otherwise volume depleted. **Controlled Narrow-Angle Glaucoma**—In clinical trials, Cymbalta was associated with an increased risk of mydriasis; therefore, it should be used cautiously in patients with controlled narrow-angle glaucoma (see CONTRAINDICATIONS, Uncontrolled Narrow-Angle Glaucoma). **Discontinuation of Treatment with Cymbalta**—Discontinuation symptoms have been systematically evaluated in patients taking Cymbalta. Following abrupt discontinuation in MDD placebo-controlled clinical trials of up to 9 weeks duration, the following symptoms occurred at a rate greater than or equal to 2% and at a significantly higher rate in Cymbalta-treated patients compared to those discontinuing from placebo: dizziness; nausea; headache; paresthesia; vomiting; irritability; and nightmare.

During marketing of other SSRIs and SNRIs (serotonin and norepinephrine reuptake inhibitors), there have been spontaneous reports of adverse events occurring upon discontinuation of these drugs, particularly when abrupt, including the following: dysphoric mood, irritability, agitation, dizziness, sensory disturbances (eg, paresthesias such as electric shock sensations), anxiety, confusion, headache, lethargy, emotional lability, insomnia, hypomania, tinnitus, and seizures. Although these events are generally self-limiting, some have been reported to be severe.

Patients should be monitored for these symptoms when discontinuing treatment with Cymbalta. A gradual reduction in the dose rather than abrupt cessation is recommended whenever possible. If intolerable symptoms occur following a decrease in the dose or upon discontinuation of treatment, then resuming the previously prescribed dose may be considered. Subsequently, the physician may continue decreasing the dose but at a more gradual rate.

**Use in Patients with Concomitant Illness**—Clinical experience with Cymbalta in patients with concomitant systemic illness is limited. There is no information on the effect that alterations in gastric motility may have on the stability of Cymbalta's enteric coating. As duloxetine is rapidly hydrolyzed in acidic media to naphthol, caution is advised in using Cymbalta in patients with conditions that may slow gastric emptying (eg, some diabetics). Cymbalta has not been systematically evaluated in patients with a recent history of myocardial infarction or unstable coronary artery disease. Patients with these diagnoses were generally excluded from clinical studies during the product's premarketing testing. However, the electrocardiograms of 321 patients who received Cymbalta in MDD placebo-controlled clinical trials and had qualitatively normal ECGs at baseline were evaluated; Cymbalta was not associated with the development of clinically significant ECG abnormalities (see ADVERSE REACTIONS, Electrocardiogram Changes). In DPN placebo-controlled clinical trials, Cymbalta-treated patients did not develop abnormal ECGs at a rate different from that in placebo-treated patients (see ADVERSE REACTIONS, Electrocardiogram Changes). In three clinical trials of Cymbalta for the management of neuropathic pain associated with diabetic peripheral neuropathy, the mean duration of diabetes was approximately 12 years, the mean baseline fasting blood glucose was 176 mg/dL, and the mean baseline hemoglobin A<sub>1c</sub> (HbA<sub>1c</sub>) was 7.8%. In the 12-week acute treatment phase of these studies, small increases in fasting blood glucose were observed in Cymbalta-treated patients. HbA<sub>1c</sub> was stable in both Cymbalta-treated and placebo-treated patients. In the extension phase of these studies, which lasted up to 52 weeks, there was an increase in HbA<sub>1c</sub> in both the Cymbalta and the routine care groups, but the mean increase was 0.3% greater in the Cymbalta-treated group. There was also a small increase in fasting blood glucose in the Cymbalta-treated group. Total cholesterol was increased in Cymbalta-treated patients (2 mg/dL) and decreased in the routine care group (6 mg/dL). Increased plasma concentrations of duloxetine, and especially of its metabolites, occur in patients with end-stage renal disease (requiring dialysis). For this reason, Cymbalta is not recommended for patients with end-stage renal disease or severe renal impairment (creatinine clearance <30 mL/min). Markedly increased exposure to duloxetine occurs in patients with hepatic insufficiency and Cymbalta should not be administered to these patients.

**Laboratory Tests**—No specific laboratory tests are recommended.

**Drug Interactions—Potential for Other Drugs to Affect Cymbalta**—Both CYP1A2 and CYP2D6 are responsible for duloxetine metabolism. **Inhibitors of CYP1A2**—Concomitant use of duloxetine with fluvoxamine, an inhibitor of CYP1A2, results in approximately a 6-fold increase in AUC and about a 2.5-fold increase in C<sub>max</sub> of duloxetine. Some quinolone antibiotics would be expected to have similar effects and these combinations should be avoided. **Inhibitors of CYP2D6**—Because CYP2D6 is involved in duloxetine metabolism, concomitant use of duloxetine with potent inhibitors of CYP2D6 may result in higher concentrations of duloxetine. Paroxetine (20 mg QD) increased the concentration of duloxetine (40 mg QD) by about 60%, and greater degrees of inhibition are expected with higher doses of paroxetine. Similar effects would be expected with other potent CYP2D6 inhibitors (eg, fluoxetine, quinidine). **Potential for Duloxetine to Affect Other Drugs—Drugs Metabolized by CYP1A2**—*In vitro* drug interaction studies demonstrate that duloxetine does not induce CYP1A2 activity, and it is unlikely to have a clinically significant effect on the metabolism of CYP1A2 substrates. **Drugs Metabolized by CYP2D6**—Cymbalta is a moderate inhibitor of CYP2D6. When duloxetine was administered (at a dose of 60 mg BID) in conjunction with a single 50-mg dose of desipramine, a CYP2D6 substrate, the AUC of desipramine increased 3-fold. Therefore, co-administration of Cymbalta with other drugs that are extensively metabolized by this isozyme and which have a narrow therapeutic index, including certain antidepressants (tricyclic antidepressants [TCAs], such as nortriptyline, amitriptyline, and imipramine), phenothiazines and Type 1C antiarrhythmics (eg, propafenone, flecainide), should be approached with caution. Plasma TCA concentrations may need to be monitored and the dose of the TCA may need to be reduced if a TCA is co-administered with Cymbalta. Because of the risk of serious ventricular arrhythmias and sudden death potentially associated with elevated plasma levels of thioridazine, Cymbalta and thioridazine should not be co-administered.

**Drugs Metabolized by CYP3A**—Results of *in vitro* studies demonstrate that duloxetine does not inhibit or induce CYP3A activity. **Cymbalta May Have a Clinically Important Interaction with the Following Other Drugs—Alcohol**—When Cymbalta and ethanol were administered several hours apart so that peak concentrations of each would coincide, Cymbalta did not increase the impairment of mental and motor skills caused by alcohol. In the Cymbalta clinical trials database, three Cymbalta-treated patients had liver injury as manifested by ALT and total bilirubin elevations, with evidence of obstruction. Substantial intercurrent ethanol use was present in each of these cases, and this may have contributed to the abnormalities seen (see PRECAUTIONS,



# KNOW THE FACTS

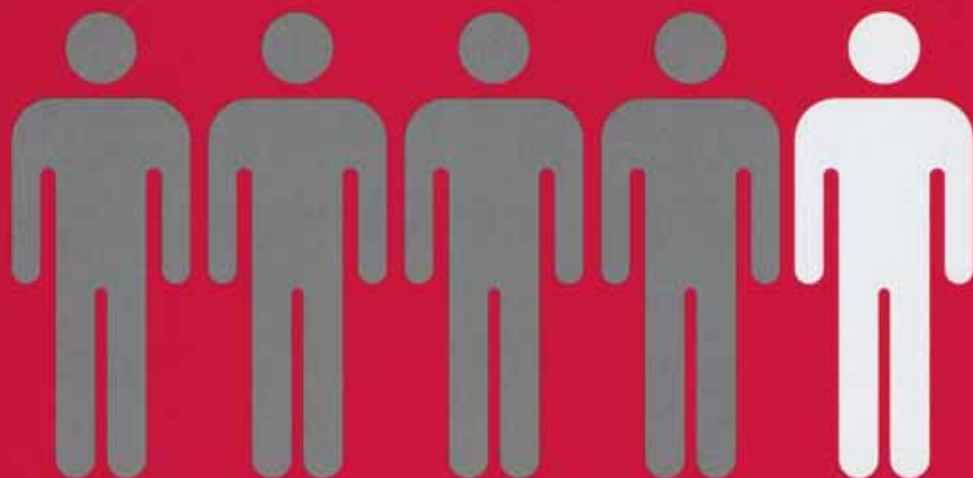

**13% of patients had diabetes in the landmark CATIE schizophrenia study at baseline—4 times more common than in the general population.<sup>1</sup>**

Be aware.  
Screen and monitor your patients.  
Make a difference.

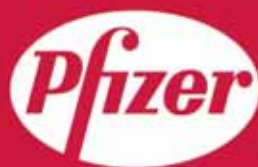

# KNOW THE FACTS

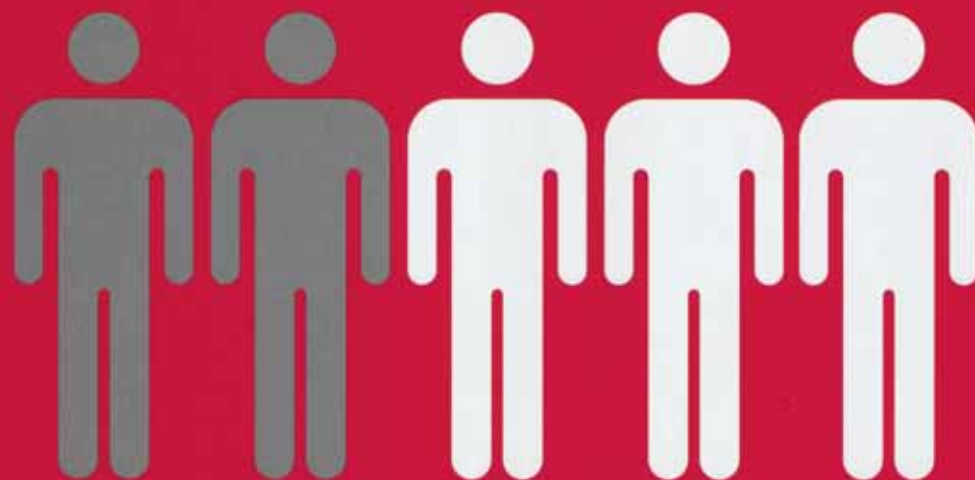

**41% of all patients had the metabolic syndrome at baseline in the landmark CATIE schizophrenia study.<sup>2</sup>**

Be aware.  
Screen and monitor your patients.  
Make a difference.

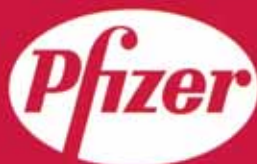

**References:** 1. Goff DC, Sullivan LM, McEvoy JP, et al. A comparison of ten-year cardiac risk estimates in schizophrenia patients from the CATIE study and matched controls. *Schizophr Res.* 2005;80:45-53. 2. McEvoy JP, Meyer JM, Goff DC, et al. Prevalence of the metabolic syndrome in patients with schizophrenia: baseline results from the Clinical Antipsychotic Trials of Intervention Effectiveness (CATIE) schizophrenia trial and comparison with national estimates from NHANES III. *Schizophr Res.* 2005;80:19-32.



**FIRST**  
IN A NOVEL  
CLASS OF  
**SLEEP**  
AGENTS

# Start and stay with nonscheduled Rozerem— ZERO evidence of abuse or dependence

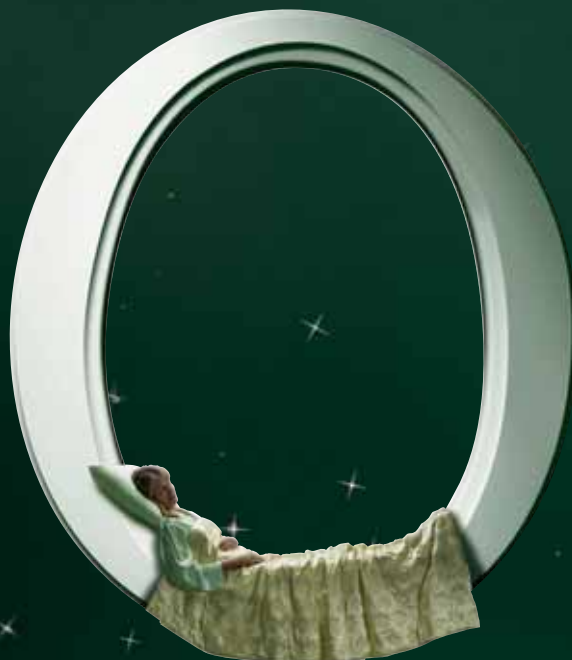

Clinical studies show no evidence  
of potential abuse, dependence, or withdrawal\*

- **First and only**—nonscheduled prescription insomnia medication...not a controlled substance and approved for long-term use<sup>1</sup>
- **First and only**—prescription insomnia medication that targets the normal sleep-wake cycle<sup>1</sup>
- **First and only**—prescription insomnia medication with no evidence of abuse potential in clinical studies<sup>1</sup>
- **First and only**—prescription insomnia medication that does not promote sleep by CNS depression<sup>1</sup>
- **Promote sleep with Rozerem**—patients who took Rozerem fell asleep faster than those who took placebo<sup>1</sup>
- **One simple 8-mg dose**<sup>1</sup>

\*Rozerem is not a controlled substance. A clinical abuse liability study showed no differences indicative of abuse potential between Rozerem and placebo at doses up to 20 times the recommended dose (N=14). Three 35-day insomnia studies showed no evidence of rebound insomnia or withdrawal symptoms with Rozerem compared to placebo (N=2082).<sup>1,2</sup>

Rozerem is indicated for the treatment of insomnia characterized by difficulty with sleep onset. Rozerem can be prescribed for long-term use. Rozerem should not be used in patients with hypersensitivity to any components of the formulation, severe hepatic impairment, or in combination with fluvoxamine. Failure of insomnia to remit after a reasonable period of time should be medically evaluated, as this may be the result of an unrecognized underlying medical disorder. Hypnotics should be administered with caution to patients exhibiting signs and symptoms of depression. Rozerem has not been studied in patients with severe sleep apnea, severe COPD, or in children or adolescents. The effects in these populations are unknown. Avoid taking Rozerem with alcohol. Rozerem has been associated with decreased testosterone levels and increased prolactin levels. Health professionals should be mindful of any unexplained symptoms possibly associated with such changes in these hormone levels. Rozerem should not be taken with or immediately after a high-fat meal. Rozerem should be taken within 30 minutes before going to bed and activities confined to preparing for bed. The most common adverse events seen with Rozerem that had at least a 2% incidence difference from placebo were somnolence, dizziness, and fatigue.

Please visit [www.rozerem.com](http://www.rozerem.com)

Please see adjacent Brief Summary of Prescribing Information.

 **Rozerem**<sup>TM</sup>  
**ramelteon** 8-mg tablets

*Proven for sleep.  
Nonscheduled for added safety.*



For attention deficit hyperactivity disorder (ADHD)

# Achieving a balance of efficacy and safety

## CONCERTA® delivers results that matter

- Children with ADHD completed more math problems accurately with CONCERTA® than with placebo<sup>1</sup>
- CONCERTA® reduced ADHD symptoms to comparable levels in children with and without comorbid ODD/CD\*<sup>2</sup>
- CONCERTA® significantly reduced symptoms of ADHD in adolescents<sup>3</sup>
- CONCERTA® helped improve interactions between adolescent patients and their parents<sup>3</sup>
- Demonstrated safety for up to 2 years in children<sup>4</sup>

\*ODD=Oppositional Defiant Disorder; CD=Conduct Disorder.

### Important Safety Information

CONCERTA® is indicated for the treatment of ADHD in children and adolescents. CONCERTA® should not be taken by patients with: significant anxiety, tension, or agitation; allergies to methylphenidate or other ingredients in CONCERTA®; glaucoma; Tourette's syndrome, tics, or family history of Tourette's syndrome; current/recent use of monoamine oxidase inhibitors (MAOIs). Children under 6 years of age should not take CONCERTA®. Abuse of methylphenidate may lead to dependence.

Use with caution in patients with psychosis, bipolar disorder, history of seizures/EEG abnormalities, and hypertension. CONCERTA® should not be used in patients with pre-existing severe gastrointestinal narrowing, known structural cardiac abnormalities, or other serious heart problems. Stimulants may

Please see brief summary of full prescribing information and references on next page.

CON06-176

CONCERTA® and OROS® are registered trademarks of ALZA Corporation.

© McNeil Pediatrics, Division of McNeil-PPC, Inc., 2006

Expires 8/07

cause new psychotic or manic symptoms; discontinuation of treatment may be appropriate. Aggressive behavior or hostility should be monitored in patients beginning treatment. Methylphenidate may produce difficulties with accommodation and blurring of vision. Hematologic monitoring is advised during prolonged therapy.

The most common adverse events reported in children aged 6 to 12 years receiving up to 54 mg were headache (14%), upper respiratory tract infection (8%), and abdominal pain (7%). The most common adverse events reported in adolescents receiving up to 72 mg were headache (9%), accidental injury (6%), and insomnia (5%).

ONCE-DAILY

**CONCERTA®**  
methylphenidate HCl

Extended-release tablets, 18 mg, 27 mg, 36 mg, 54 mg

Delivering results that matter

For more information, call 1-888-440-7903 or visit [www.concerta.net](http://www.concerta.net)



FOR THE TREATMENT OF SCHIZOPHRENIA

NEW

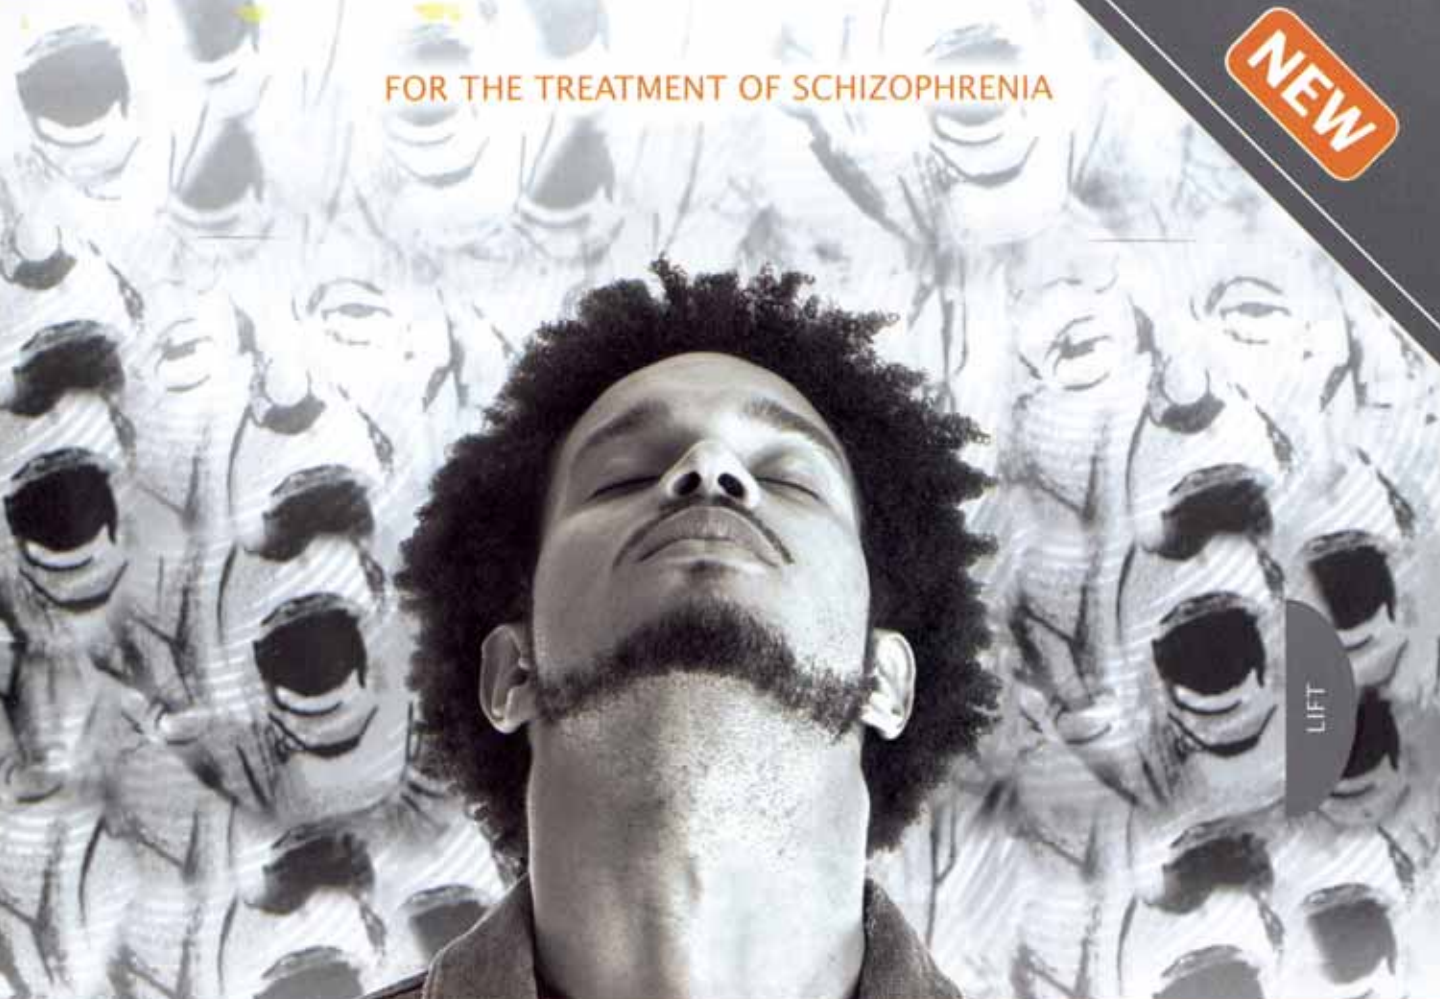

LIFT

He Needs a Powerful Antipsychotic for His Mind

But What Will It Do to His Body?

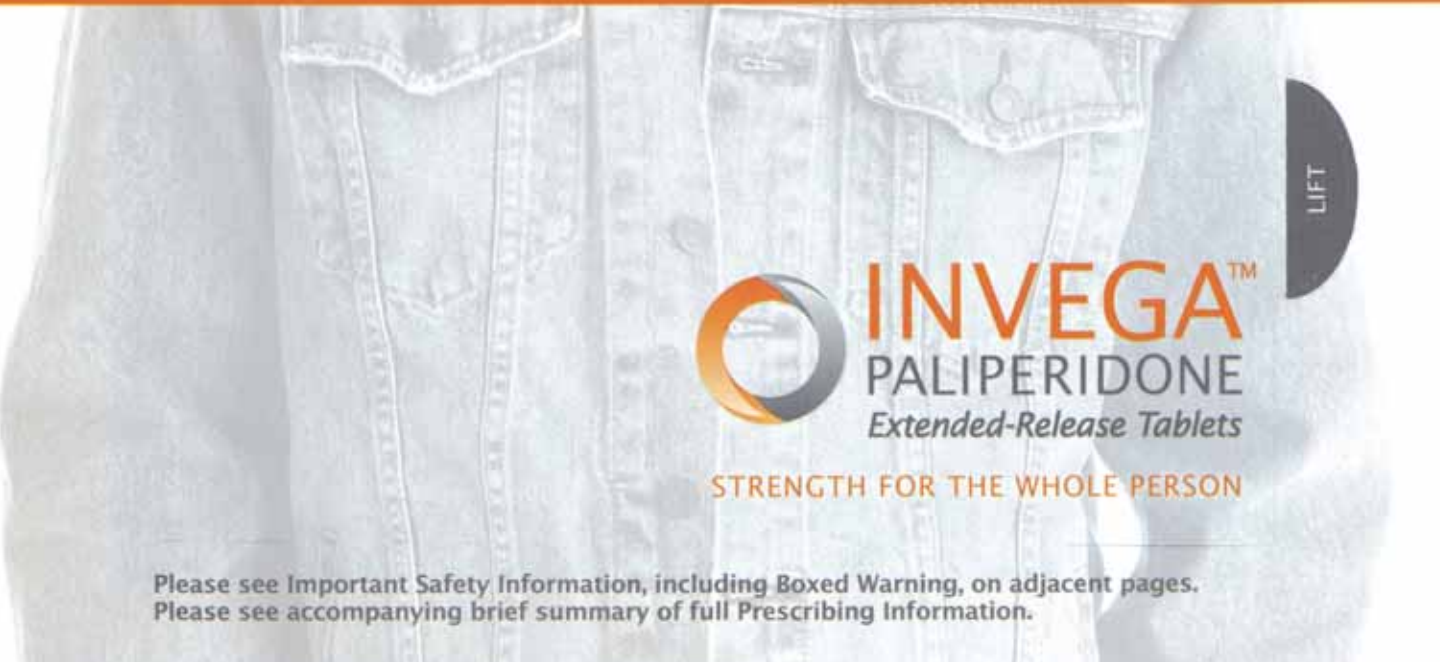

LIFT

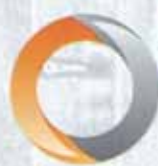

**INVEGA™**  
PALIPERIDONE  
*Extended-Release Tablets*

STRENGTH FOR THE WHOLE PERSON

Please see Important Safety Information, including Boxed Warning, on adjacent pages.  
Please see accompanying brief summary of full Prescribing Information.

# A NEW ORAL ATYPICAL ANTIPSYCHOTIC FOR THE TREATMENT OF SCHIZOPHRENIA

INTRODUCING

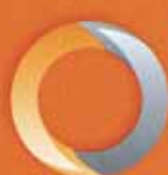

**INVEGA**<sup>™</sup>  
**PALIPERIDONE**  
*Extended-Release Tablets*

STRENGTH FOR THE WHOLE PERSON

## IMPORTANT SAFETY INFORMATION

### Increased Mortality in Elderly Patients with Dementia-Related Psychosis

Elderly patients with dementia-related psychosis treated with atypical antipsychotic drugs are at an increased risk of death compared to placebo. Analyses of seventeen placebo-controlled trials (modal duration of 10 weeks) in these patients revealed a risk of death in the drug-treated patients of between 1.6 to 1.7 times that seen in placebo-treated patients. Over the course of a typical 10-week controlled trial, the rate of death in drug-treated patients was about 4.5%, compared to a rate of about 2.6% in the placebo group. Although the causes of death were varied, most of the deaths appeared to be either cardiovascular (e.g., heart failure, sudden death) or infectious (e.g., pneumonia) in nature. Neither INVEGA<sup>™</sup> (paliperidone) nor RISPERDAL<sup>®</sup> (risperidone) are approved for the treatment of patients with Dementia-Related Psychosis.

**Commonly observed adverse events:** The most commonly observed adverse events occurring at an incidence of  $\geq 5\%$  and at least 2 times placebo were: **INVEGA:** akathisia and extrapyramidal disorder; **RISPERDAL:** anxiety, somnolence, extrapyramidal symptoms, dizziness, constipation, nausea, dyspepsia, rhinitis, rash, and tachycardia.

**QT Prolongation:** INVEGA causes a modest increase in the corrected QT (QTc) interval. INVEGA should be avoided in combination with other drugs that are known to prolong the QTc interval, in patients with congenital long QT syndrome or a history of cardiac arrhythmias. Certain circumstances may increase the risk of torsades de pointes and/or sudden death in association with the use of drugs that prolong the QTc interval.

**Neuroleptic malignant syndrome (NMS):** NMS, a potentially fatal symptom complex, has been reported with the use of antipsychotic medications, including INVEGA and RISPERDAL. Clinical manifestations include muscle rigidity, fever, altered mental status and evidence of autonomic instability (see full Prescribing Information). Management should include immediate discontinuation of antipsychotic drugs and other drugs not essential to concurrent therapy, intensive symptomatic treatment and medical monitoring, and treatment of any concomitant serious medical problems.

**Tardive dyskinesia (TD):** TD is a syndrome of potentially irreversible, involuntary, dyskinetic movements that may develop in patients treated with antipsychotic medications. The risk of developing TD and the likelihood that dyskinetic movements will become irreversible are believed to increase with duration of treatment and total cumulative dose. Elderly patients appeared to be at increased risk for TD. Prescribing should be consistent with the need to minimize the risk of TD. The syndrome may remit, partially or completely, if antipsychotic treatment is withdrawn.

Please see accompanying brief summary of full Prescribing Information for INVEGA and RISPERDAL.

NEW

## Powerful Efficacy for the Mind With Safety and Tolerability for the Body

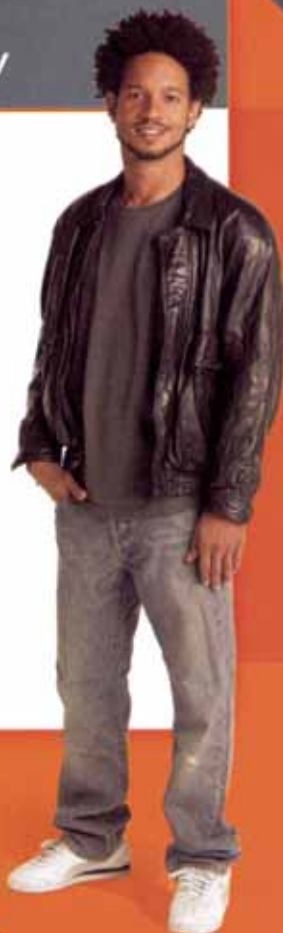

### INVEGA is specifically created to combine:

- The active metabolite of RISPERDAL® (risperidone)
- Innovative OROS® extended-release technology

### INVEGA has been shown to deliver:

- Significant efficacy in the positive and negative symptoms of schizophrenia<sup>1</sup>
- Low weight gain and EPS rates comparable with placebo in 6-week trials with the recommended 6-mg dose<sup>1</sup>

**Hyperglycemia and Diabetes:** Hyperglycemia, some cases extreme and associated with ketoacidosis, hyperosmolar coma or death, has been reported in patients treated with atypical antipsychotics (APs). Patients starting treatment with APs who have or are at risk for diabetes, should undergo fasting blood glucose testing at the beginning of and during treatment. Patients who develop symptoms of hyperglycemia should also undergo fasting blood glucose testing.

**Gastrointestinal:** INVEGA should ordinarily not be administered to patients with pre-existing severe gastrointestinal narrowing. Rare instances of obstructive symptoms have been reported in patients with known strictures taking non-deformable formulations. INVEGA should only be used in patients who are able to swallow the tablet whole.

**Cerebrovascular adverse events (CAEs):** CAEs, including fatalities, have been reported in elderly patients with dementia-related psychosis taking atypical antipsychotics in clinical trials. Neither INVEGA nor RISPERDAL are approved for treating these patients.

**Orthostatic hypotension and Syncope:** INVEGA and RISPERDAL can cause orthostatic hypotension and syncope in some patients. Appropriate monitoring of orthostatic vital signs should be considered.

**Seizures:** INVEGA and RISPERDAL should be used cautiously in patients with a history of seizures.

**Hyperprolactinemia:** As with other drugs that antagonize dopamine D<sub>2</sub> receptors, INVEGA and RISPERDAL elevate prolactin levels and the elevation persists during chronic administration.

**Suicide:** The possibility of suicide attempt is inherent in psychotic illnesses and close supervision of high-risk patients should accompany drug therapy.

**Maintenance treatment:** Physicians who elect to use INVEGA and RISPERDAL for extended periods should periodically re-evaluate the long-term risks and benefits of the drug for the individual patient.

**Extrapyramidal symptoms (EPS):** Total EPS-related adverse events in the higher 9-mg and 12-mg treatment groups were 25% and 26%, respectively, versus 11% for the placebo group.

**Weight gain:** The proportion of subjects having a weight gain of  $\geq 7\%$  body weight were comparable to placebo (5% for 3 mg (7%) and 6 mg (6%). A higher incidence was seen for 9 mg (9%) and 12 mg (9%).

Reference: 1. Data on file. Janssen LP, Titusville, NJ.

© Janssen, L.P. 2007 January 2007 01JN169

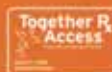

Together Rx Access  
is a trademark of  
Together Rx Access, LLC.

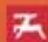

Janssen

# INVEGA™

(paliperidone)

## Extended-Release Tablets

**BEFORE PRESCRIBING, PLEASE CONSULT COMPLETE PRESCRIBING INFORMATION OF WHICH THE FOLLOWING IS A BRIEF SUMMARY**  
Rx only

### Increased Mortality in Elderly Patients with Dementia-Related Psychosis

Elderly patients with dementia-related psychosis treated with atypical antipsychotic drugs are at an increased risk of death compared to placebo. Analyses of 17 placebo-controlled trials (modal duration of 10 weeks) in these subjects revealed a risk of death in the drug-treated subjects of between 1.6 to 1.7 times that seen in placebo-treated subjects. Over the course of a typical 10-week controlled trial, the rate of death in drug-treated subjects was about 4.5%, compared to a rate of about 2.6% in the placebo group. Although the causes of death were varied, most of the deaths appeared to be either cardiovascular (e.g., heart failure, sudden death) or infectious (e.g., pneumonia) in nature. INVEGA™ (paliperidone) Extended-Release Tablets is not approved for the treatment of patients with dementia-related psychosis.

**INDICATIONS AND USAGE:** INVEGA™ (paliperidone) Extended-Release Tablets is indicated for the treatment of schizophrenia.

**CONTRAINDICATIONS:** INVEGA™ (paliperidone) is contraindicated in patients with a known hypersensitivity to paliperidone, risperidone, or to any components in the INVEGA™ formulation.

**WARNINGS: Increased Mortality in Elderly Patients with Dementia-Related Psychosis – Elderly patients with dementia-related psychosis treated with atypical antipsychotic drugs are at an increased risk of death compared to placebo. INVEGA™ (paliperidone) Extended-Release Tablets is not approved for the treatment of dementia-related psychosis (see Boxed Warning). QT Prolongation:** Paliperidone causes a modest increase in the corrected QT (QTc) interval. The use of paliperidone should be avoided in combination with other drugs that are known to prolong QTc including Class IA (e.g., quinidine, procainamide) or Class III (e.g., amiodarone, sotalol) antiarrhythmic medications, antipsychotic medications (e.g., chlorpromazine, thioridazine), antibiotics (e.g., gentamicin, moxifloxacin), or any other class of medications known to prolong the QTc interval. Paliperidone should also be avoided in patients with congenital long QT syndrome and in patients with a history of cardiac arrhythmias. Certain circumstances may increase the risk of the occurrence of torsade de pointes and/or sudden death in association with the use of drugs that prolong the QTc interval, including (1) bradycardia; (2) hypokalemia or hypomagnesemia; (3) concomitant use of other drugs that prolong the QTc interval; and (4) presence of congenital prolongation of the QT interval. The effects of paliperidone on the QT interval were evaluated in a double-blind, active-controlled (moxifloxacin 400 mg single dose), multicenter QT study in adults with schizophrenia and schizoaffective disorder, and in three placebo- and active-controlled 6-week, fixed-dose efficacy trials in adults with schizophrenia. In the QT study (n = 141), the 8 mg dose of immediate-release oral paliperidone (n=44) showed a mean placebo-subtracted increase from baseline in QTcD of 12.3 msec (90% CI: 8.9; 15.6) on Day 8 at 1.5 hours post-dose. The mean steady-state peak plasma concentration for this 8 mg dose of paliperidone immediate-release was more than twice the exposure observed with the maximum recommended 12 mg dose of INVEGA™ (C<sub>max</sub> = 113 and 45 ng/mL, respectively, when administered with a standard breakfast). In this same study, a 4 mg dose of the immediate-release oral formulation of paliperidone, for which C<sub>max</sub> = 35 ng/mL, showed an increased placebo-subtracted QTcD of 6.8 msec (90% CI: 3.6; 10.1) on day 2 at 1.5 hours post-dose. None of the subjects had a change exceeding 60 msec or a QTcD exceeding 500 msec at any time during this study. For the three fixed-dose efficacy studies, electrocardiogram (ECG) measurements taken at various time points showed only one subject in the INVEGA™ 12 mg group had a change exceeding 60 msec at one time-point on Day 6 (increase of 62 msec). No subject receiving INVEGA™ had a QTcD exceeding 500 msec at any time in any of these three studies. **Neuroleptic Malignant Syndrome:** A potentially fatal symptom complex sometimes referred to as Neuroleptic Malignant Syndrome (NMS) has been reported with antipsychotic drugs. Clinical manifestations of NMS are hyperreflexia, muscle rigidity, altered mental status, and evidence of autonomic instability. Other signs may include elevated creatine phosphokinase, myoglobinuria (rhabdomyolysis), and acute renal failure. Management should include: discontinuation of the antipsychotic and other drugs not essential to therapy; intensive symptomatic treatment and medical monitoring; and treatment of other serious medical problems. If a patient requires antipsychotic drugs after recovery from NMS, the reintroduction of drug therapy should be carefully considered. The patient should be carefully monitored, since recurrences have been reported. **Tardive Dyskinesia:** A syndrome of potentially irreversible, involuntary, dyskinetic movements may develop in patients treated with antipsychotic drugs. The risk of developing and likelihood that it will become irreversible are believed to increase with the duration of treatment and the total cumulative dose. However, tardive dyskinesia can develop after brief treatment periods at low doses. There is no known treatment for established cases of tardive dyskinesia, although it may remit, partially or completely, if the antipsychotic is withdrawn. Prescribing should be in a manner to minimize the occurrence. In patients who require chronic treatment, the smallest dose and the shortest duration of treatment producing a satisfactory clinical response should be sought. The need for continued treatment should be reassessed periodically. If signs and symptoms should appear, drug discontinuation should be considered. **Hyperglycemia and Diabetes Mellitus:** Hyperglycemia, in some cases extreme and associated with ketacidosis or hyperosmolar coma or death, has been reported in patients treated with atypical antipsychotics. Patients with an established diagnosis of diabetes mellitus who are started on atypical antipsychotics should be monitored regularly for worsening of glucose control. Patients with risk factors for diabetes mellitus (e.g., obesity, family history of diabetes) who are starting treatment with atypical antipsychotics should undergo fasting blood glucose testing at the beginning of treatment and periodically during treatment. **Gastrointestinal:** Because the INVEGA™ tablet is non-deformable and does not appreciably change in shape in the gastrointestinal tract, INVEGA™ should ordinarily not be administered to patients with pre-existing severe gastrointestinal narrowing (pathologic or iatrogenic, for example: esophageal motility disorders, small bowel inflammatory disease, "short gut" syndrome due to adhesions or decreased transit time, past history of peritonitis, cystic fibrosis, chronic intestinal pseudoobstruction, or Meckel's diverticulum). There have been rare reports of obstructive symptoms in patients with known strictures in association with the ingestion of drugs in non-deformable controlled-release formulations. Because of the controlled-release design of the tablet, INVEGA™ should only be used in patients who are able to swallow the tablet whole (see PRECAUTIONS: Information for Patients). A decrease in transit time, e.g., as seen with diarrhea, would be expected to decrease bioavailability and an increase in transit time, e.g., as seen with gastrointestinal neuropathy, diabetic gastroparesis, or other causes, would be expected to increase bioavailability. These changes in bioavailability are more likely when the changes in transit time occur in the upper GI tract.

**Cerebrovascular Adverse Events, Including Stroke, in Elderly Patients With Dementia-Related Psychosis:** In placebo-controlled trials with risperidone, aripiprazole, and olanzapine in elderly subjects with dementia, there was a higher incidence of cerebrovascular adverse events (cerebrovascular accidents and transient ischemic attacks) including fatalities compared to placebo-treated subjects. INVEGA™ was not marketed at the time these studies were performed. INVEGA™ is not approved for the treatment of patients with dementia-related psychosis (see also Boxed WARNING, WARNINGS: Increased Mortality in Elderly Patients with Dementia-Related Psychosis).

### PRECAUTIONS

**General: Orthostatic Hypotension and Syncope:** Paliperidone can induce orthostatic hypotension and syncope in some patients because of its alpha-blocking activity. In pooled results of the three placebo-controlled, 6-week, fixed-dose trials, syncope was reported in 0.8% (7/850) of subjects treated with INVEGA™ (3, 6, 9, 12 mg) compared to 0.3% (1/355) of subjects treated with placebo. INVEGA™ should be used with caution in patients with known cardiovascular disease (e.g., heart failure, history of myocardial infarction or ischemia, conduction abnormalities), cerebrovascular disease, or conditions that predispose the patient to hypotension (dehydration, hypovolemia, and treatment with antihypertensive medications). Monitoring of orthostatic vital signs should be considered in patients who are vulnerable to hypotension. **Seizures:** Like other antipsychotic drugs, INVEGA™ should be used cautiously in patients with a history of seizures or other conditions that potentially lower the seizure threshold. **Hyperprolactinemia:** Like other drugs that antagonize dopamine D<sub>2</sub> receptors, paliperidone elevates prolactin levels and the elevation persists during chronic administration. Paliperidone has a prolactin-elevating effect similar to that seen with risperidone, a drug that is associated with higher levels of prolactin than other antipsychotic drugs. Galactorrhea, amenorrhea, gynecomastia, and impotence have been reported in patients receiving prolactin-elevating compounds. An increase in the incidence of pituitary gland, mammary gland, and pancreatic islet cell neoplasia (mammary adenocarcinomas, pituitary and pancreatic adenomas) was observed in the risperidone carcinogenicity studies conducted in mice and rats (see PRECAUTIONS: Carcinogenesis, Mutagenesis, Impairment of Fertility). Neither clinical studies nor epidemiologic studies conducted to date have shown an association between chronic administration of this class of drugs and tumorigenesis in humans, but the available evidence is too limited to be conclusive. **Dysphagia:** Esophageal dysmotility and aspiration have been associated with antipsychotic drug use. Aspiration pneumonia is a common cause of morbidity and mortality in patients with advanced Alzheimer's dementia. INVEGA™ and other antipsychotic drugs should be used cautiously

in patients at risk for aspiration pneumonia. **Suicide:** The possibility of suicide attempt is inherent in psychotic illnesses, and close supervision of high-risk patients should accompany drug therapy. **Potential for Cognitive and Motor Impairment:** Somnolence and sedation were reported in subjects treated with INVEGA™ (see ADVERSE REACTIONS). Antipsychotics, including INVEGA™, have the potential to impair judgment, thinking, or motor skills. Patients should be cautioned about performing activities requiring mental alertness, such as operating hazardous machinery or operating a motor vehicle, until they are reasonably certain that paliperidone therapy does not adversely affect them. **Priapism:** No cases of priapism have been reported in clinical trials with INVEGA™. **Thrombotic Thrombocytopenia Purpura (TTP):** No cases of TTP were observed during clinical studies with paliperidone. Although cases of TTP have been reported in association with risperidone administration, the relationship to risperidone therapy is unknown. **Body Temperature Regulation:** Disruption of the body's ability to reduce core body temperature has been attributed to antipsychotic agents. Appropriate care is advised when prescribing INVEGA™ to patients who will be experiencing conditions which may contribute to an elevation in core body temperature. **Antiemetic Effect:** An antiemetic effect was observed in preclinical studies with paliperidone. This effect, if it occurs in humans, may mask the signs and symptoms of overdose with certain drugs or conditions such as intestinal obstruction, Rye's syndrome, and brain tumor. **Use in Patients with Concomitant Illnesses:** Clinical experience with INVEGA™ in patients with certain concomitant illnesses is limited (see CLINICAL PHARMACOLOGY: Pharmacokinetics: Special Populations). **Hepatic Impairment and Renal Impairment (see CLINICAL PHARMACOLOGY: Pharmacokinetics: Special Populations):** Hepatic Impairment and Renal Impairment (see CLINICAL PHARMACOLOGY: Pharmacokinetics: Special Populations). **Patients with Lewy Bodies** are reported to have an increased sensitivity to antipsychotic medication. Manifestations of this increased sensitivity include confusion, obtundation, postural instability with frequent falls, extrapyramidal symptoms, and clinical features consistent with the neuroleptic malignant syndrome. INVEGA™ has not been evaluated or used to any appreciable extent in patients with a recent history of myocardial infarction or unstable heart disease. Patients with these diagnoses were excluded from premarketing clinical trials. Because of the risk of orthostatic hypotension with INVEGA™, caution should be observed in patients with known cardiovascular disease (see PRECAUTIONS: General: Orthostatic Hypotension and Syncope). **Information for Patients:** Physicians are advised to discuss the following issues with patients for whom they prescribe INVEGA™. **Orthostatic Hypotension:** Patients should be advised that there is risk of orthostatic hypotension, particularly at the time of initiating treatment, re-initiating treatment, or increasing the dose. **Interference With Cognitive and Motor Performance:** As INVEGA™ has the potential to impair judgment, thinking, or motor skills, patients should be cautioned about operating hazardous machinery, including automobiles, until they are reasonably certain that INVEGA™ therapy does not affect them adversely. **Pregnancy:** Patients should be advised to notify their physician if they become pregnant or intend to become pregnant during treatment with INVEGA™. **Nursing:** Patients should be advised not to breast-feed an infant if they are taking INVEGA™. **Concomitant Medication:** Patients should be advised to inform their physicians if they are taking, or plan to take, any prescription or over-the-counter drugs, as there is a potential for interactions. **Alcohol:** Patients should be advised to avoid alcohol while taking INVEGA™. **Heat Exposure and Dehydration:** Patients should be advised regarding appropriate care in avoiding overheating and dehydration. **Administration:** Patients should be informed that INVEGA™ should be swallowed whole with the aid of liquids. Tablets should not be chewed, divided, or crushed. The medication is contained within a nonabsorbable shell designed to release the drug at a controlled rate. The tablet shell, along with insoluble core components, is eliminated from the body; patients should not be concerned if they occasionally notice something that looks like a tablet in their stool. **Drug Interactions: Potential for INVEGA™ to Affect Other Drugs –** Paliperidone is not expected to cause clinically important pharmacokinetic interactions with drugs that are metabolized by cytochrome P450 isozymes. *In vitro* studies in human liver microsomes showed that paliperidone does not substantially inhibit the metabolism of drugs metabolized by cytochrome P450 isozymes, including CYP1A2, CYP2A6, CYP2C8/9/10, CYP2D6, CYP2E1, CYP3A4, and CYP3A5. Therefore, paliperidone is not expected to inhibit clearance of drugs that are metabolized by these metabolic pathways in a clinically relevant manner. Paliperidone is also not expected to have enzyme inducing properties. At therapeutic concentrations, paliperidone did not inhibit P-glycoprotein. Paliperidone is therefore not expected to inhibit P-glycoprotein-mediated transport of other drugs in a clinically relevant manner. Given the primary CNS effects of paliperidone (see ADVERSE REACTIONS), INVEGA™ should be used with caution in combination with other centrally acting drugs and alcohol. Paliperidone may antagonize the effect of levodopa and other dopamine agonists. Because of its potential for inducing orthostatic hypotension, an additive effect may be observed when INVEGA™ is administered with other therapeutic agents that have this potential (see PRECAUTIONS: General: Orthostatic Hypotension and Syncope). **Potential for Other Drugs to Affect INVEGA™ –** Paliperidone is not a substrate of CYP1A2, CYP2A6, CYP2C9, and CYP2C19, so that an interaction with inhibitors or inducers of these isozymes is unlikely. While *in vitro* studies indicate that CYP2D6 and CYP3A4 may be minimally involved in paliperidone metabolism, *in vivo* studies do not show decreased elimination by these isozymes and they contribute to only a small fraction of total body clearance. **Carcinogenesis, Mutagenesis, Impairment of Fertility: Carcinogenesis:** Carcinogenicity studies of paliperidone have not been performed. Carcinogenicity studies of risperidone, which is extensively converted to paliperidone in rats, mice, and humans, were conducted in Swiss albino mice and Wistar rats. Risperidone was administered in the diet at daily doses of 0.63, 2.5, and 10 mg/kg for 18 months to mice and for 25 months to rats. A maximum tolerated dose was not achieved in male mice. There were statistically significant increases in pituitary gland adenomas, endocrine pancreas adenomas, and mammary gland adenocarcinomas. The no-effect dose for these tumors was less than or equal to the maximum recommended human dose of risperidone on a mg/m<sup>2</sup> basis (see risperidone package insert). An increase in mammary, pituitary, and endocrine pancreas neoplasms has been found in rodents after chronic administration of other antipsychotic drugs and is considered to be mediated by prolonged dopamine D<sub>2</sub> antagonism and hyperprolactinemia. The relevance of these tumor findings in rodents in terms of human risk is unknown (see PRECAUTIONS: General: Hyperprolactinemia). **Mutagenesis:** No evidence of genotoxic potential for paliperidone was found in the Ames reverse mutation test, the mouse lymphoma assay, or the *in vivo* rat micronucleus test. **Impairment of Fertility:** In a study of fertility, the percentage of treated female rats that became pregnant was not affected at oral doses of paliperidone of up to 2.5 mg/kg/day. However, pre- and post-implantation loss was increased, and the number of live embryos was slightly decreased, at 2.5 mg/kg, a dose that also caused slight maternal toxicity. These parameters were not affected at a dose of 0.63 mg/kg, which is half of the maximum recommended human dose on a mg/m<sup>2</sup> basis. The fertility of male rats was not affected at oral doses of paliperidone of up to 2.5 mg/kg/day, although sperm count and sperm viability studies were not conducted with paliperidone. In a subchronic study in Beagle dogs with risperidone, which is extensively converted to paliperidone in dogs and humans, all doses tested (0.31-5.0 mg/kg) resulted in decreases in serum testosterone and in sperm motility and concentration. Serum testosterone and sperm parameters partially recovered, but remained decreased after the last observation (two months after treatment was discontinued). **Pregnancy: Pregnancy Category C:** In studies in rats and rabbits in which paliperidone was given orally during the period of organogenesis, there were no increases in fetal abnormalities up to the highest doses tested (10 mg/kg/day in rats and 5 mg/kg/day in rabbits, which are 8 times the maximum recommended human dose on a mg/m<sup>2</sup> basis). In rat reproduction studies with risperidone, which is extensively converted to paliperidone in rats and humans, increases in pup deaths were seen at oral doses which are less than the maximum recommended human dose of risperidone on a mg/m<sup>2</sup> basis (see risperidone package insert). Use of first generation antipsychotic drugs during the last trimester of pregnancy has been associated with extrapyramidal symptoms in the neonate. These symptoms are usually self-limited. It is not known whether paliperidone, when taken near the end of pregnancy, will lead to similar neonatal signs and symptoms. There are no adequate and well controlled studies of INVEGA™ in pregnant women. INVEGA™ should be used during pregnancy only if the potential benefit justifies the potential risk to the fetus. **Labor and Delivery:** The effect of INVEGA™ on labor and delivery in humans is unknown. **Nursing Mothers:** In animal studies with paliperidone and in human studies with risperidone, paliperidone was excreted in the milk. Therefore, women receiving INVEGA™ should not breast-feed infants. **Pediatric Use:** Safety and effectiveness of INVEGA™ in patients < 18 years of age have not been established. **Geriatric Use:** The safety, tolerability, and efficacy of INVEGA™ were evaluated in a 6-week placebo-controlled study of 114 elderly subjects with schizophrenia (65 years of age and older, of whom 21 were 75 years of age and older). In this study, subjects received flexible doses of INVEGA™ (3 to 12 mg once daily). In addition, a small number of subjects 65 years of age and older were included in the 6-week placebo-controlled studies which adult schizophrenic subjects received fixed doses of INVEGA™ (3 to 15 mg once daily, see CLINICAL PHARMACOLOGY: Clinical Trials in full PI). Overall, of the total number of subjects in clinical studies of INVEGA™ (n = 1796), including those who received INVEGA™ or placebo, 125 (7.0%) were 65 years of age and older and 22 (1.2%) were 75 years of age and older. No overall differences in safety or effectiveness were observed between these subjects and younger subjects, and other reported clinical experience has not identified differences in response between the elderly and younger patients, but greater sensitivity of some older individuals cannot be ruled out. This drug is known to be substantially excreted by the kidney and clearance is decreased in patients with moderate to severe renal impairment (see CLINICAL PHARMACOLOGY: Pharmacokinetics: Special Populations: Renal Impairment in full PI), who should be given reduced doses. Because elderly patients are more likely to have decreased renal function, care should be taken in dose selection, and it may be useful to monitor renal function (see DOSAGE AND ADMINISTRATION: Dosing in Special Populations in full PI).

### ADVERSE REACTIONS

The information below is derived from a clinical trial database for INVEGA™ consisting of 2720 patients and/or normal subjects exposed to one or more doses of INVEGA™ for the treatment of schizophrenia. Of these 2720 patients, 2054 were patients who received INVEGA™ while participating in multiple dose, effectiveness trials. The conditions and duration of treatment with INVEGA™ varied greatly and included (in overlapping categories) open-label and double-blind phases of studies, inpatients and outpatients, fixed-dose and flexible-dose studies, and



short-term and longer-term exposure. Adverse events were assessed by collecting adverse events and performing physical examinations, vital signs, weights, laboratory analyses and ECGs. Adverse events during exposure were obtained by general inquiry and recorded by clinical investigators using their own terminology. Consequently, to provide a meaningful estimate of the proportion of individuals experiencing adverse events, events were grouped in standardized categories using MedDRA terminology. The stated frequencies of adverse events represent the proportions of individuals who experienced a treatment-emergent adverse event of the type listed. An event was considered treatment emergent if it occurred for the first time or worsened while receiving therapy following baseline evaluation. **Adverse Events Observed in Short-Term, Placebo-Controlled Trials of Subjects with Schizophrenia** The information presented in these sections were derived from pooled data from the three placebo-controlled, 6-week, fixed-dose studies based on subjects with schizophrenia who received INVEGA™ at daily doses within the recommended range of 3 to 12 mg (n = 850). Adverse Events Occurring at an Incidence of 2% or More Among INVEGA™-Treated Patients with Schizophrenia and More Frequent on Drug than Placebo Table 1 enumerates the pooled incidences of treatment-emergent adverse events that were spontaneously reported in the three placebo-controlled, 6-week, fixed-dose studies, listing those events that occurred in 2% or more of subjects treated with INVEGA™ in any of the dose groups, and for which the incidence in INVEGA™-treated subjects in any of the dose groups was greater than the incidence in subjects treated with placebo.

**Treatment-Emergent Adverse Events in Short-Term, Fixed-Dose, Placebo-Controlled Trials in Adult Subjects with Schizophrenia: Body System or Organ Class (Dictionary-derived Term)** Percentage of Patients Reporting Event INVEGA™ Placebo (N=355) first, INVEGA™ dosage once daily 3 mg (N=127) second, 6 mg (N=235) third, 9 mg (N=246) fourth, 12 mg (N=242) fifth. **Total no. subjects with adverse events** 66, 72, 66, 70, 76. **Cardiac disorders:** Atrioventricular block first degree 1, 2, 0, 2, 1; Bundle branch block 2, 3, 1, 3, <1; Sinus arrhythmia 0, 2, 1, 1, <1; Tachycardia 7, 14, 12, 12, 14; **Eye disorders:** Vision blurred 1, 1, <1, 0, 2; **Gastrointestinal disorders:** Abdominal pain upper 1, 1, 3, 2, 2; Dry mouth 1, 2, 3, 1, 3; Dyspepsia 4, 2, 3, 2, 5; Nausea 5, 6, 4, 4, 4; Salivary hypersecretion <1, 0, <1, 1, 4; **General disorders:** Asthenia 1, 2, <1, 2; Fatigue 1, 2, 1, 2, 2; Pyrexia 1, 1, <1, 2; **Investigations:** Blood insulin increased 1, 2, 1, 1, <1; Blood pressure increased 1, 2, <1, <1, 1; Electrocardiogram QT corrected interval prolonged 3, 3, 4, 3, 5; Electrocardiogram T wave abnormal 1, 2, 1, 2, 1; **Musculoskeletal and connective tissue disorders:** Back pain 1, 1, 1, 1, 1, 2; Pain in extremity 1, 0, 1, 0, 2; **Nervous system disorders:** Akathisia 4, 4, 3, 8, 10; Dizziness 4, 6, 5, 4, 5; Dystonia 1, 1, 1, 5, 4; Extrapyrmidial disorder 2, 5, 2, 7, 7; Headache 12, 11, 12, 14, 14; Hypertonia 1, 2, 1, 4, 3; Parkinsonism 0, 0, <1, 2, 1; Somnolence 7, 6, 9, 10, 11; Tremor 3, 3, 3, 4, 3; **Psychiatric disorders:** Anxiety 8, 9, 7, 6, 5; **Respiratory, thoracic and mediastinal disorders:** Cough 1, 3, 2, 3, 2; **Vascular disorders:** Orthostatic hypotension 1, 2, 1, 2, 4; \*Table includes adverse events that were reported in 2% or more of subjects in any of the INVEGA™ dose groups and which occurred at greater incidence than in the placebo group. Data are pooled from three studies; one included once-daily INVEGA™ doses of 3 and 9 mg, the second study included 6, 9, and 12 mg, and the third study included 6 and 12 mg (see CLINICAL PHARMACOLOGY: Clinical Trials in full PI). Events for which the INVEGA™ incidence was equal to or less than placebo are not listed in the table, but included the following: constipation, diarrhea, vomiting, nasopharyngitis, agitation, and insomnia. **Dose-Related Adverse Events in Clinical Trials:** Based on the pooled data from the three placebo-controlled, 6-week, fixed-dose studies, adverse events that occurred with a greater than 2% incidence in the subjects treated with INVEGA™, the incidences of the following adverse events increased with dose: somnolence, orthostatic hypotension, salivary hypersecretion, akathisia, dystonia, extrapyramidal disorder, hypertonia and Parkinsonism. For most of these, the increased incidence was seen primarily at the 12 mg, and in some cases the 9 mg dose. **Common and Drug-Related Adverse Events in Clinical Trials** Adverse events reported in 5% or more of subjects treated with INVEGA™ and at least twice the placebo rate for at least one dose included: akathisia and extrapyramidal disorder. **Extrapyramidal Symptoms (EPS) in Clinical Trials:** Pooled data from the three placebo-controlled, 6-week, fixed-dose studies provided information regarding treatment-emergent EPS. Several methods were used to measure EPS: (1) the Simpson-Angus global score (mean change from baseline) which broadly evaluates Parkinsonism; (2) the Barnes Akathisia Rating Scale global clinical rating score (mean change from baseline) which evaluates akathisia; (3) use of anticholinergic medications to treat emergent EPS; and (4) incidence of spontaneous reports of EPS. For the Simpson-Angus Scale, spontaneous EPS reports and use of anticholinergic medications, there was a dose-related increase observed for the 9 mg and 12 mg doses. There was no difference observed between placebo and INVEGA™ 3 mg and 6 mg doses for any of these EPS measures. **Percentage of Patients INVEGA™ Placebo (N=355) first, INVEGA™ dosage once daily 3 mg (N=127) second, 6 mg (N=235) third, 9 mg (N=246) fourth, 12 mg (N=242) fifth. EPS Group:** Parkinsonism \* 9, 11, 3, 15, 14; Akathisia † 6, 4, 7, 9; Use of anticholinergic medications \* 10, 10, 9, 22, 22. \* For Parkinsonism, percent of patients with Simpson-Angus global score > 0.3 (Global score defined as total sum of items score divided by the number of items). † For Akathisia, percent of patients with Barnes Akathisia Rating Scale global score ≥ 2. ‡ Percent of patients who received anticholinergic medications to treat emergent EPS. **Percentage of Patients INVEGA™ Placebo (N=355) first, INVEGA™ dosage once daily 3 mg (N=127) second, 6 mg (N=235) third, 9 mg (N=246) fourth, 12 mg (N=242) fifth. EPS Group:** Overall percentage of patients with EPS-related AE 11.0, 12.6, 10.2, 25.2, 26.0; Dyskinesia 4.7, 2.6, 7.7, 8.7; Dystonia 1.1, 0.8, 1.3, 5.3, 4.5; Hyperkinesia 3.9, 3.9, 3.0, 8.1, 9.9; Parkinsonism 2.3, 3.1, 2.6, 7.3, 6.2; Tremor 3.4, 3.1, 2.6, 4.5, 3.3; Dyskinesia group includes: Dyskinesia, Extrapyrmidial disorder, Muscle twitching, Tardive dyskinesia Dystonia group includes: Dystonia, Muscle spasms, Oculogyration, Trismus. Hyperkinesia group includes: Akathisia, Hyperkinesia, Parkinsonism group includes: Bradycardia, Cogwheel rigidity, Drooling, Hypertonia, Hypokinesia, Muscle rigidity, Musculoskeletal stiffness, Parkinsonism, Tremor group includes: Tremor. **Adverse Events Associated with Discontinuation of Treatment in Controlled Clinical Studies:** Overall, there was no difference in the incidence of discontinuation due to adverse events between INVEGA™-treated (5%) and placebo-treated (5%) subjects. The types of adverse events that led to discontinuation were similar for the INVEGA™- and placebo-treated subjects, except for Nervous System Disorders events which were more common among INVEGA™-treated subjects than placebo-treated subjects (2% and 0%, respectively), and Psychiatric Disorders events which were more common among placebo-treated subjects than INVEGA™-treated subjects (3% and 1%, respectively). **Demographic Differences in Adverse Reactions in Clinical Trials:** An examination of population subgroups in the three placebo-controlled, 6-week, fixed-dose studies did not reveal any evidence of differences in safety on the basis of age, gender or race (see PRECAUTIONS: Geriatric Use). **Laboratory Test Abnormalities in Clinical Trials:** In the pooled data from the three placebo-controlled, 6-week, fixed-dose studies, between-group comparisons revealed no medically important differences between INVEGA™ and placebo in the proportions of subjects experiencing potentially clinically significant changes in routine hematology, urinalysis, or serum chemistry, including mean changes from baseline in fasting glucose, insulin, c-peptide, triglyceride, HDL, LDL, and total cholesterol measurements. Similarly, there were no differences between INVEGA™ and placebo in the incidence of discontinuations due to changes in hematology, urinalysis, or serum chemistry. However, INVEGA™ was associated with increases in serum prolactin (see PRECAUTIONS: General: Hyperprolactinemia). **Weight Gain in Clinical Trials:** In the pooled data from the three placebo-controlled, 6-week, fixed-dose studies, the proportions of subjects having a weight gain of ≥ 7% of body weight were similar for INVEGA™ 3 mg and 6 mg (7% and 6%, respectively) and placebo (5%), but there was a higher incidence of weight gain for INVEGA™ 9 mg and 12 mg (9% and 9%, respectively). **Other Events Observed During the Premarketing Evaluation of INVEGA™:** The following list contains all serious and non-serious treatment-emergent adverse events reported at any time by individuals taking INVEGA™ during any phase of a trial within the premarketing database (n = 2720), except (1) those listed in Table 1 above or elsewhere in labeling, (2) those for which a causal relationship to INVEGA™ use was considered remote, and (3) those occurring in only one subject treated with INVEGA™ and that were not acutely life-threatening. Events are classified within body system categories using the following definitions: *very frequent* adverse events are defined as those occurring on one or more occasions in at least 1/10 subjects, *frequent* adverse events are defined as those occurring on one or more occasions in at least 1/100 subjects, *infrequent* adverse events are those occurring on one or more occasions in 1/100 to 1/1000 subjects, and *rare* events are those occurring on one or more occasions in less than 1/1000 subjects. **Blood and Lymphatic System Disorders:** rare: thrombocytopenia; **Cardiac Disorders:** frequent: palpitations; *infrequent:* bradycardia; **Gastrointestinal Disorders:** frequent: abdominal pain; *infrequent:* swollen tongue; **General Disorders:** *infrequent:* edema; **Immune Disorder:** rare: anaphylactic reaction; **Nervous System Disorders:** rare: coordination abnormal; **Psychiatric Disorders:** *infrequent:* confusional state; **Respiratory, Thoracic and Mediastinal Disorders:** frequent: dyspnea; rare: pulmonary embolus; **Vascular Disorders:** rare: ischemia, venous thrombosis; **Adverse Events Reported With Risperidone:** Paliperidone is the major active metabolite of risperidone. Adverse events reported with risperidone can be found in the ADVERSE REACTIONS section of the risperidone package insert.

#### DRUG ABUSE AND DEPENDENCE

**Controlled Substance:** INVEGA™ (paliperidone) is not a controlled substance.

**For more information on symptoms and treatment of overdose, see full Prescribing Information.**

101059005

Issued: December 2006

© Janssen, L.P. 2006

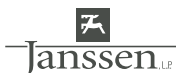

01JN217B

## RISPERDAL® (RISPERIDONE) TABLETS/ORAL SOLUTION

## RISPERDAL® M-TAB® (RISPERIDONE) ORALLY DISINTEGRATING TABLETS

**Brief Summary of Full Prescribing Information for Schizophrenia and Bipolar Mania. CLINICAL STUDIES FOR OTHER INDICATIONS WILL HAVE DIFFERING ADVERSE EVENTS AND SAFETY CONCERNS. PLEASE SEE FULL PI FOR THIS INFORMATION REGARDING RISPERDAL® FOR AUTISM.**

#### Increased Mortality in Elderly Patients with Dementia-Related Psychosis

Elderly patients with dementia-related psychosis treated with atypical antipsychotic drugs are at an increased risk of death compared to placebo. Analyses of seventeen placebo controlled trials (modal duration of 10 weeks) in these patients revealed a risk of death in the drug-treated patients of between 1.6 to 1.7 times that seen in placebo-treated patients. Over the course of a typical 10 week controlled trial, the rate of death in drug-treated patients was about 4.5%, compared to a rate of about 2.6% in the placebo group. Although the causes of death were varied, most of the deaths appeared to be either cardiovascular (e.g., heart failure, sudden death) or infectious (e.g., pneumonia) in nature. RISPERDAL® (risperidone) is not approved for the treatment of patients with Dementia-Related Psychosis.

**INDICATIONS AND USAGE:** RISPERDAL® (risperidone) is indicated for the treatment of schizophrenia. **Monotherapy:** RISPERDAL® is indicated for the short-term treatment of acute manic or mixed episodes associated with Bipolar I Disorder. **Combination Therapy:** The combination of RISPERDAL® with lithium or valproate is indicated for the short-term treatment of acute manic or mixed episodes associated with Bipolar I Disorder.

**CONTRAINDICATIONS:** RISPERDAL® (risperidone) is contraindicated in patients with a known hypersensitivity to the product.

**WARNINGS: Increased Mortality in Elderly Patients with Dementia-Related Psychosis:** Elderly patients with dementia-related psychosis treated with atypical antipsychotic drugs are at an increased risk of death compared to placebo. RISPERDAL® (risperidone) is not approved for the treatment of dementia-related psychosis (see Boxed Warning). **Neuroleptic Malignant Syndrome (NMS):** A potentially fatal symptom complex sometimes referred to as Neuroleptic Malignant Syndrome (NMS) has been reported with antipsychotic drugs. Clinical manifestations of NMS are hyperreflexia, muscle rigidity, altered mental status, and evidence of autonomic instability. Other signs may include elevated creatinine phosphokinase, myoglobinuria (rhabdomyolysis), and acute renal failure. Management should include: discontinuation of the antipsychotic and other drugs not essential to therapy; intensive symptomatic treatment and medical monitoring; and treatment of other serious medical problems. If a patient requires antipsychotic drugs after recovery from NMS, the reintroduction of drug therapy should be carefully considered. The patient should be carefully monitored, since recurrences have been reported. **Tardive Dyskinesia:** A syndrome of potentially irreversible, involuntary, dyskinetic movements may develop in patients treated with antipsychotic drugs. The risk of developing and likelihood that it will become irreversible are believed to increase with the duration of treatment and the total cumulative dose. However, tardive dyskinesia can develop after brief treatment periods at low doses. There is no known treatment for established cases of tardive dyskinesia, although it may remit, partially or completely, if the antipsychotic is withdrawn. Prescribing should be in a manner to minimize the occurrence. In patients who require chronic treatment, the smallest dose and the shortest duration of treatment producing a satisfactory clinical response should be sought. The need for continued treatment should be reassessed periodically. If signs and symptoms should appear drug discontinuation should be considered. **Cerebrovascular Adverse Events, Including Stroke, in Elderly Patients With Dementia-Related Psychosis:** Cerebrovascular adverse events (e.g., stroke, transient ischemic attack), including fatalities, were reported in patients (mean age 85 years; range 73-97) in trials of risperidone in elderly patients with dementia-related psychosis. In placebo-controlled trials, there was a significantly higher incidence of cerebrovascular adverse events in patients treated with risperidone compared to patients treated with placebo. RISPERDAL® is not approved for the treatment of patients with dementia-related psychosis. (See also Boxed Warning.)

**WARNING: WARNINGS: Increased Mortality in Elderly Patients with Dementia-Related Psychosis.)** **Hyperglycemia and Diabetes Mellitus:** Hyperglycemia, in some cases extreme and associated with ketoacidosis or hyperosmolar coma or death, has been reported in patients treated with atypical antipsychotics including RISPERDAL®. Patients with an established diagnosis of diabetes mellitus who are started on atypical antipsychotics should be monitored regularly for worsening of glucose control. Patients with risk factors for diabetes mellitus (e.g., obesity, family history of diabetes) who are starting treatment with atypical antipsychotics should undergo fasting blood glucose testing at the beginning of treatment and periodically during treatment.

**PRECAUTIONS: General: Orthostatic Hypotension:** RISPERDAL® (risperidone) may induce orthostatic hypotension associated with dizziness, tachycardia, and in some patients, syncope, especially during the initial dose-titration period, probably reflecting its alpha-adrenergic antagonistic properties. Syncope was reported in 0.2% (6/2607) of RISPERDAL®-treated patients in Phase 2 and 3 studies. The risk of orthostatic hypotension and syncope may be minimized by limiting the initial dose to 2 mg total (either QD or 1 mg BID) in normal adults and 0.5 mg BID in the elderly and patients with renal or hepatic impairment (see DOSAGE AND ADMINISTRATION in full PI). Monitoring of orthostatic vital signs should be considered in patients for whom this is of concern. A dose reduction should be considered if hypotension occurs. RISPERDAL® should be used with particular caution in patients with known cardiovascular disease (history of myocardial infarction or ischemia, heart failure, or conduction abnormalities), cerebrovascular disease, and conditions which would predispose patients to hypotension, e.g., dehydration and hypovolemia. Clinically significant hypotension has been observed with concomitant use of RISPERDAL® and antihypertensive medication. **Seizures:** RISPERDAL® should be used cautiously in patients with a history of seizures. **Dyspnea:** Esophageal dysmotility and aspiration have been associated with antipsychotic drug use. Aspiration pneumonia is a common cause of morbidity and mortality in patients with advanced Alzheimer's dementia. RISPERDAL® and other antipsychotic drugs should be used cautiously in patients at risk for aspiration pneumonia. (See also Boxed WARNING.)

**WARNING: Increased Mortality in Elderly Patients with Dementia-Related Psychosis.)** **Hyperprolactinemia:** As with other drugs that antagonize dopamine D<sub>2</sub> receptors, risperidone elevates prolactin levels and the elevation persists during chronic administration. Risperidone is associated with higher levels of prolactin elevation than other antipsychotic agents. Galactorrhea, amenorrhea, gynecostasia, and impotence have been reported in patients receiving prolactin-elevating compounds. An increase in pituitary gland, mammary gland, and pancreatic islet cell neoplasia (mammary adenocarcinomas, pituitary and pancreatic adenomas) was observed in the risperidone carcinogenicity studies conducted in mice and rats (see PRECAUTIONS - Carcinogenesis, Mutagenesis, Impairment of Fertility). Neither clinical studies nor epidemiologic studies conducted to date have shown an association between chronic administration of this class of drugs and tumorigenesis in humans; the available evidence is considered too limited to be conclusive at this time. **Potential for Cognitive and Motor Impairment:** Somnolence was a commonly reported adverse event associated with RISPERDAL® treatment, especially when ascertained by direct questioning of patients. This adverse event is dose-related. Patients should be cautioned about operating hazardous machinery, including automobiles, until they are reasonably certain that RISPERDAL® therapy does not affect them adversely. **Priapism:** Rare cases of priapism have been reported. **Thrombotic Thrombocytopenic Purpura (TTP):** A single case of TTP was reported in a 28 year-old female patient receiving RISPERDAL® in a large, open premarketing experience (approximately 1300 patients). She experienced jaundice, fever, and bruising, but eventually recovered after receiving plasmapheresis. The relationship to RISPERDAL® therapy is unknown. **Antiemetic Effect:** Risperidone has an antiemetic effect in animals; this effect may also occur in humans, and may mask signs and symptoms of overdose with certain drugs or of conditions such as intestinal obstruction, Reye's syndrome, and brain tumor. **Body Temperature Regulation:** Disruption of body temperature regulation has been attributed to antipsychotic agents. Caution is advised when prescribing for patients who will be exposed to temperature extremes. **Suicide:** The possibility of a suicide attempt is inherent in patients with schizophrenia and bipolar mania, including children and adolescent patients, and close supervision of high-risk patients should accompany drug therapy. **Use in Patients With Concomitant Illness:** Clinical experience with RISPERDAL® in patients with certain concomitant systemic illnesses is limited. Patients with Parkinson's Disease or Dementia with Lewy Bodies who receive antipsychotics, including RISPERDAL®, are reported to have an increased sensitivity to antipsychotic medications. Manifestations of this increased sensitivity have been reported to include confusion, obtundation, postural instability with frequent falls, extrapyramidal symptoms, and clinical features consistent with the neuroleptic malignant syndrome. Caution is advisable in using RISPERDAL® in patients with diseases or conditions that could affect metabolism or hemodynamic responses. Increased plasma concentrations of risperidone and 9-hydroxyrisperidone occur in patients with severe renal impairment and in patients with severe hepatic impairment. A lower starting dose should be used in such patients. **Information for Patients:** Physicians are advised to discuss the following issues with patients for whom they prescribe RISPERDAL®. **Orthostatic Hypotension:** Patients should be advised of the risk of orthostatic hypotension, especially during the period of initial dose titration. **Interference With Cognitive and Motor Performance:** Since RISPERDAL® has the potential to impair judgment, thinking, or motor skills, patients should be cautioned about operating hazardous machinery, including automobiles, until they are reasonably certain that RISPERDAL® therapy does not affect them adversely. **Pregnancy:** Patients should be advised to notify their physician if they become pregnant or intend to become pregnant during therapy. **Nursing:** Patients should be advised not to breast-feed an infant if they are taking RISPERDAL®. **Concomitant Medication:** Patients should be advised to inform their physicians if they are taking, or plan to take, any prescription or over-the-counter drugs, since there is a potential for interactions. **Alcohol:** Patients should be advised to avoid alcohol while taking RISPERDAL®. **Phenylethanolamines:** Phenylethanolamine is a component of aspartame. Each 4 mg RISPERDAL® M-TAB® Orally Disintegrating Tablet contains 0.84 mg phenylethanolamine; each 3 mg RISPERDAL® M-TAB® Orally Disintegrating Tablet contains 0.63 mg phenylethanolamine; each 2 mg RISPERDAL® M-TAB®

Orally Disintegrating Tablet contains 0.42 mg phenylalanine; each 1 mg RISPERDAL<sup>®</sup> M-TAB<sup>®</sup> Orally Disintegrating Tablet contains 0.28 mg phenylalanine; and each 0.5 mg RISPERDAL<sup>®</sup> M-TAB<sup>®</sup> Orally Disintegrating Tablet contains 0.14 mg phenylalanine. **Drug Interactions:** The interactions of RISPERDAL<sup>®</sup> and other drugs have not been systematically evaluated. Given the primary CNS effects of risperidone, caution should be used when RISPERDAL<sup>®</sup> is taken in combination with other centrally acting drugs and alcohol. Because of its potential for inducing hypotension, RISPERDAL<sup>®</sup> may enhance the hypotensive effects of other therapeutic agents with this potential. RISPERDAL<sup>®</sup> may antagonize the effects of levodopa and dopamine agonists. Chronic administration of clozapine with risperidone may decrease the clearance of risperidone. **Carbamazepine and Other Enzyme Inducers:** In a drug interaction study in schizophrenic patients, 11 subjects received risperidone titrated to 6 mg/day for 3 weeks, followed by concurrent administration of carbamazepine for an additional 3 weeks. During co-administration, the plasma concentrations of risperidone and its pharmacologically active metabolite, 9-hydroxyrisperidone, were decreased by about 50%. Plasma concentrations of carbamazepine did not appear to be affected. The dose of risperidone may need to be titrated accordingly for patients receiving carbamazepine, particularly during initiation or discontinuation of carbamazepine therapy. Co-administration of other known enzyme inducers (e.g., phenytoin, rifampin, and phenobarbital) with risperidone may cause similar decreases in the combined plasma concentrations of risperidone and 9-hydroxyrisperidone, which could lead to decreased efficacy of risperidone treatment. **Fluoxetine and Paroxetine:** Fluoxetine (20 mg QD) and paroxetine (20 mg QD) have been shown to increase the plasma concentration of risperidone 2.5-2.8 fold and 3-9 fold respectively. Fluoxetine did not affect the plasma concentration of 9-hydroxyrisperidone. Paroxetine lowered the concentration of 9-hydroxyrisperidone by about 10%. When either concomitant fluoxetine or paroxetine is initiated or discontinued, the physician should re-evaluate the dosing of RISPERDAL<sup>®</sup>. The effects of discontinuation of concomitant fluoxetine or paroxetine therapy on the pharmacokinetics of risperidone and 9-hydroxyrisperidone have not been studied. **Lithium:** Repeated oral doses of risperidone (3 mg BID) did not affect the exposure (AUC) or peak plasma concentrations (C<sub>max</sub>) of lithium (n=13). **Valproate:** Repeated oral doses of risperidone (4 mg QD) did not affect the pre-dose or average plasma concentrations and exposure (AUC) of valproate (1000 mg/day in three divided doses) compared to placebo (n=21). However, there was a 20% increase in valproate peak plasma concentration (C<sub>max</sub>) after concomitant administration of risperidone. **Digoxin:** RISPERDAL<sup>®</sup> (0.25 mg BID) did not show a clinically relevant effect on the pharmacokinetics of digoxin. **Drugs That Inhibit CYP 2D6 and Other CYP Isozymes:** Risperidone is metabolized to 9-hydroxyrisperidone by CYP 2D6, an enzyme that is polymorphic in the population and that can be inhibited by a variety of psychotropic and other drugs (see CLINICAL PHARMACOLOGY in full PI). Drug interactions that reduce the metabolism of risperidone to 9-hydroxyrisperidone would increase the plasma concentrations of risperidone and lower the concentrations of 9-hydroxyrisperidone. Analysis of clinical studies involving a modest number of poor metabolizers (n=70) does not suggest that poor and extensive metabolizers have different rates of adverse effects. No comparison of effectiveness in the two groups has been made. *In vitro* studies showed that drugs metabolized by other CYP isozymes, including 1A1, 1A2, 2C9, 2C19, and 3A4, are not weak inhibitors of risperidone metabolism. There were no significant interactions between risperidone and erythromycin (see CLINICAL PHARMACOLOGY in full PI). **Drugs Metabolized by CYP 2D6:** *In vitro* studies indicate that risperidone is a relatively weak inhibitor of CYP 2D6. Therefore, RISPERDAL<sup>®</sup> is not expected to substantially inhibit the clearance of drugs that are metabolized by this enzymatic pathway. In drug interaction studies, risperidone did not significantly affect the pharmacokinetics of donepezil and galantamine, which are metabolized by CYP 2D6. **Carcinogenesis, Mutagenesis, Impairment of Fertility; Carcinogenesis:** Carcinogenicity studies were conducted in Swiss albino mice and Wistar rats. Risperidone was administered in the diet at dosages of 0.63, 2.5, and 10 mg/kg for 18 months to mice and for 25 months to rats. These doses are equivalent to 2.4, 9.4, and 37.5 times the maximum recommended human dose (MRHD) for schizophrenia (16 mg/day) on a mg/kg basis, and 0.2, 0.75, and 3 times the MRHD (mice) or 0.4, 1.5, and 6 times the MRHD (rats) on a mg/m<sup>2</sup> basis. A maximum tolerated dose was not achieved in male mice. There were statistically significant increases in pituitary gland adenomas, endocrine pancreas adenomas, and mammary gland adenocarcinomas. These findings are considered to be prolactin-mediated. The relevance for human risk of the findings of prolactin-mediated endocrine tumors in rodents is unknown (see PRECAUTIONS, General - Hyperprolactinemia). **Mutagenesis:** No evidence of mutagenic potential for risperidone was found. **Impairment of Fertility:** Risperidone (0.16 to 5 mg/kg) was shown to impair mating, but not fertility, in Wistar rats in three reproductive studies at doses 0.1 to 3 times the maximum recommended human dose (MRHD) on a mg/m<sup>2</sup> basis. **Pregnancy; Pregnancy Category C:** The teratogenic potential of risperidone was studied in three Segment II studies in Sprague-Dawley and Wistar rats (0.63-10 mg/kg or 0.4 to 6 times the maximum recommended human dose [MRHD] on a mg/m<sup>2</sup> basis) and in one Segment II study in New Zealand rabbits (0.31-5 mg/kg or 0.4 to 6 times the MRHD on a mg/m<sup>2</sup> basis). The incidence of malformations was not increased compared to control in offspring of rats or rabbits given 0.4 to 6 times the MRHD on a mg/m<sup>2</sup> basis. In three reproductive studies in rats (two Segment III and one multigenerational study), there was an increase in pup deaths during the first 4 days of lactation at doses of 0.16-5 mg/kg or 0.1 to 3 times the MRHD on a mg/m<sup>2</sup> basis. It is not known whether these deaths were due to a direct effect on the fetuses or pups or to effects on the dams. There was no no-effect dose for increased rat pup mortality. In one Segment III study, there was an increase in stillborn rat pups at a dose of 2.5 mg/kg or 1.5 times the MRHD on a mg/m<sup>2</sup> basis. In a cross-fostering study in Wistar rats, toxic effects on the fetus or pups, as evidenced by a decrease in the number of live pups and an increase in the number of dead pups at birth (Day 0), and a decrease in birth weight in pups of drug-treated dams were observed. In addition, there was an increase in deaths by Day 1 among pups of drug-treated dams, regardless of whether or not the pups were cross-fostered. Risperidone also appeared to impair maternal behavior in that pup body weight gain and survival (from Day 1 to 4 of lactation) were reduced in pups born to control but reared by drug-treated dams. These effects were all noted at one dose of risperidone tested, i.e., 5 mg/kg or 3 times the MRHD on a mg/m<sup>2</sup> basis. Placental transfer of risperidone occurs in rat pups. There is no adequate and well-controlled studies in pregnant women. However, there was one report of a case of agenesis of the corpus callosum in an infant exposed to risperidone *in utero*. The causal relationship to RISPERDAL<sup>®</sup> therapy is unknown. Reversible extrapyramidal symptoms in the neonate were observed following postmarketing use of risperidone during the last trimester of pregnancy. RISPERDAL<sup>®</sup> should be used during pregnancy only if the potential benefit justifies the potential risk to the fetus. **Labor and Delivery:** The effect of RISPERDAL<sup>®</sup> on labor and delivery in humans is unknown. **Nursing Mothers:** In animal studies, risperidone and 9-hydroxyrisperidone are excreted in milk. Risperidone and 9-hydroxyrisperidone are also excreted in human breast milk. Therefore, women receiving risperidone should not breast-feed. **Pediatric Use:** The safety and effectiveness of RISPERDAL<sup>®</sup> in pediatric patients with schizophrenia or bipolar mania have not been established. **Tardive Dyskinesia:** In clinical trials in 1885 children and adolescents with autistic disorder or other psychiatric disorders treated with risperidone, 2 (0.1%) patients were reported to have tardive dyskinesia, which resolved on discontinuation of risperidone treatment (see WARNINGS - Tardive Dyskinesia). **Weight Gain:** In long-term, open-label trials (studies in patients with autistic disorder or other psychiatric disorders), a mean increase of 7.5 kg after 12 months of RISPERDAL<sup>®</sup> treatment was observed, which was higher than the expected normal weight gain (approximately 3 to 3.5 kg per year adjusted for age, based on Centers for Disease Control and Prevention normative data). The majority of that increase occurred within the first 6 months of exposure to RISPERDAL<sup>®</sup>. The average percentiles at baseline and 12 months, respectively, were 49 and 60 for weight, 48 and 53 for height, and 50 and 62 for body mass index. When treating patients with RISPERDAL<sup>®</sup>, weight gain should be assessed against that expected with normal growth. (See also ADVERSE REACTIONS.) **Somnolence:** Somnolence was frequently observed in placebo-controlled clinical trials of pediatric patients with autistic disorder. Most cases were mild or moderate in severity. These events were most often of early onset with peak incidence occurring during the first two weeks of treatment, and transient with a median duration of 16 days. (See also ADVERSE REACTIONS.) Patients experiencing persistent somnolence may benefit from a change in dosing regimen. **Hyperprolactinemia, Growth, and Sexual Maturation:** Risperidone has been shown to elevate prolactin levels in children and adolescents as well as in adults (see PRECAUTIONS - Hyperprolactinemia). In double-blind, placebo-controlled studies of up to 8 weeks duration in children and adolescents (aged 5 to 17 years), 49% of patients who received risperidone had elevated prolactin levels compared to 2% of patients who received placebo. In clinical trials in 1885 children and adolescents with autistic disorder or other psychiatric disorders treated with risperidone, galactorrhea was reported in 0.8% of risperidone-treated patients and gynecomastia was reported in 2.3% of risperidone-treated patients. The long-term effects of risperidone on growth and sexual maturation have not been fully evaluated. **Geriatric Use:** Clinical studies of RISPERDAL<sup>®</sup> in the treatment of schizophrenia did not include sufficient numbers of patients aged 65 and over to determine whether or not they respond differently than younger patients. Other reported clinical experience has not identified differences in responses between elderly and younger patients. In general, a lower starting dose is recommended for an elderly patient, reflecting a decreased pharmacokinetic clearance in the elderly, as well as a greater frequency of decreased hepatic, renal, or cardiac function, and of concomitant disease or other drug therapy (see CLINICAL PHARMACOLOGY and DOSAGE AND ADMINISTRATION in full PI). While elderly patients exhibit a greater tendency to orthostatic hypotension, its risk in the elderly may be minimized by limiting the initial dose to 0.5 mg BID followed by careful titration (see PRECAUTIONS). Monitoring of orthostatic vital signs should be considered in patients for whom this is of concern. This drug is substantially excreted by the kidneys, and the risk of toxic reactions to this drug may be greater in patients with impaired renal function. Because elderly patients are more likely to have decreased renal function, care should be taken in dose selection, and it may be useful to monitor renal function (see DOSAGE AND ADMINISTRATION in full PI). **Concomitant use with Furosemide in Elderly Patients with Dementia-Related Psychosis:** In placebo-controlled trials in elderly patients with dementia-related psychosis, a higher incidence of mortality was observed in patients treated with furosemide plus risperidone when compared to patients treated with risperidone alone or with placebo plus furosemide. No pathological mechanism has been identified to explain this finding, and no consistent pattern for cause of death was observed. An increase of mortality in elderly patients with dementia-related psychosis was seen with the use of RISPERDAL<sup>®</sup> regardless of concomitant use with furosemide. RISPERDAL<sup>®</sup> is not approved for the treatment of patients with dementia-related psychosis. (See Boxed WARNING, WARNINGS: Increased Mortality in Elderly Patients with Dementia-Related Psychosis.)

**ADVERSE REACTIONS: Associated With Discontinuation of Treatment: Bipolar Mania:** In the US placebo-controlled trial with risperidone as monotherapy, approximately 8% (10/134) of RISPERDAL<sup>®</sup>-treated patients discontinued treatment due to an adverse event, compared with approximately 6% (7/125) of placebo-treated patients. The adverse events associated with discontinuation and considered to be possibly, probably, or very likely drug-related included paranoia, somnolence, dizziness, extrapyramidal disorder, and muscle contractions involuntary. Each of these events occurred in one RISPERDAL<sup>®</sup>-treated patient (0.7%) and in no placebo-treated patients (0%). In the US placebo-controlled trial with risperidone as adjunctive therapy to mood stabilizers, there was no overall difference in the incidence of discontinuation due to adverse events (4% for RISPERDAL<sup>®</sup> vs. 4% for placebo). **Incidence in Controlled Trials: Commonly Observed Adverse Events in Controlled Clinical Trials: Bipolar Mania:** In the US placebo-controlled trial with risperidone as monotherapy, the most commonly observed adverse events associated with the use of RISPERDAL<sup>®</sup> (incidence of 5% or greater and at least twice that of placebo) were somnolence, dystonia, akathisia, dyspepsia, nausea, parkinsonism, vision abnormal, and saliva increased. In the US placebo-controlled trial with risperidone as adjunctive therapy to mood stabilizers, the most commonly observed adverse events associated with the use of RISPERDAL<sup>®</sup> were somnolence, dizziness, parkinsonism, saliva increased, akathisia, abdominal pain, and urinary incontinence. *Adverse Events Occurring at an Incidence of 2% or More Among RISPERDAL<sup>®</sup>-Treated Patients - Bipolar Mania:* Adverse events that occurred at an incidence of 2% or more, and were more frequent among patients treated with flexible doses of RISPERDAL<sup>®</sup> (1-6 mg daily as monotherapy and as adjunctive therapy to mood stabilizers, respectively) than among patients treated with placebo. Reported adverse events were classified using the World Health Organization preferred terms. *Incidence of Treatment-Emergent Adverse Events in a 3-Week, Placebo-Controlled Trial-Monotherapy in Bipolar Mania.* **Body System/Preferred Term: Central & peripheral nervous system:** Dystonia, Akathisia, Dizziness, Parkinsonism, Hypoaesthesia **Psychiatric:** Somnolence, Agitation, Manic reaction, Anxiety, Concentration impaired **Gastrointestinal system:** Dyspepsia, Nausea, Saliva increased, Mouth dry **Body as a whole - general:** Pain, Fatigue, Injury **Respiratory system:** Sinusitis, Rhinitis, Coughing **Skin and appendages:** Acne, Pruritus **Musculo-Skeletal:** Myalgia, Skeletal pain **Metabolic and nutritional:** Weight increase **Vision disorders:** Vision abnormal **Cardiovascular, general:** Hypertension, Hypotension **Heart rate and rhythm:** Tachycardia. *Incidence of Treatment-Emergent Adverse Events in a 3-Week, Placebo-Controlled Trial - Adjunctive Therapy in Bipolar Mania.* **Body System/Preferred Term:** **Gastrointestinal system:** Saliva increased, Diarrhea, Abdominal pain, Constipation, Mouth dry, Tooth ache, Tooth disorder **Central & peripheral nervous system:** Dizziness, Parkinsonism, Akathisia, Dystonia **Psychiatric:** Somnolence, Anxiety, Confusion **Respiratory system:** Rhinitis, Pharyngitis, Coughing **Body as a whole - general:** Asthenia **Urinary system:** Urinary incontinence **Heart rate and rhythm:** Tachycardia **Metabolic and nutritional:** Weight increase **Skin and appendages:** Rash, **Dose Dependency of Adverse Events:** Data from two fixed-dose trials provided evidence of dose-relatedness for extrapyramidal symptoms associated with risperidone treatment. These symptoms include: sleepiness, increased duration of sleep, accommodation disturbances, orthostatic dizziness, palpitations, weight gain, erectile dysfunction, ejaculatory dysfunction, orgasmic dysfunction, asthenia/litude/increased fatigability, and increased pigmentation. *Vital Sign Changes:* RISPERDAL<sup>®</sup> is associated with orthostatic hypotension and tachycardia (see PRECAUTIONS). *Weight Changes:* A statistically significantly greater incidence of weight gain for RISPERDAL<sup>®</sup> (18%) compared to placebo (9%). *Laboratory Changes:* A between-group comparison for 6- to 8-week placebo-controlled trials revealed no statistically significant RISPERDAL<sup>®</sup>/placebo differences in the proportions of patients experiencing potentially important changes in routine serum chemistry, hematology, or urinalysis parameters. Similarly, there were no RISPERDAL<sup>®</sup>/placebo differences in the incidence of discontinuations for changes in serum chemistry, hematology, or urinalysis. However, RISPERDAL<sup>®</sup> administration was associated with increases in serum prolactin (see PRECAUTIONS). *ECG Changes:* Between-group comparisons for pooled placebo-controlled trials revealed no statistically significant differences between risperidone and placebo in mean changes from baseline in ECG parameters, including QT, QTc, and PR intervals, and heart rate. When all RISPERDAL<sup>®</sup> doses were pooled from randomized controlled trials in several indications, there was a mean increase in heart rate of 1 beat per minute compared to no change for placebo patients. In short-term schizophrenia trials, higher doses of risperidone (8-16 mg/day) were associated with a higher mean increase in heart rate compared to placebo (4-6 beats per minute). **Adverse Events and Other Safety Measures in Pediatric Patients With Autistic Disorder:** In the two 8-week, placebo-controlled trials in pediatric patients treated for irritability associated with autistic disorder (n=156), two patients (one treated with RISPERDAL<sup>®</sup> and one treated with placebo) discontinued treatment due to an adverse event. *Incidence of Treatment-Emergent Adverse Events in Two 8-Week, Placebo-Controlled Trials in Pediatric Patients with Autistic Disorder.* **Body System Preferred Term: Psychiatric:** Somnolence, Appetite increased, Confusion **Gastrointestinal:** Saliva increased, Constipation, Dry mouth **Body as a whole - general:** Fatigue **Central & peripheral nervous system:** Tremor, Dystonia, Dizziness, Automatism, Dyskinesia, Parkinsonism **Respiratory:** Upper respiratory tract infection **Metabolic and nutritional:** Weight increase **Heart rate and rhythm:** Tachycardia **Other Events Observed During the Premarketing Evaluation of RISPERDAL<sup>®</sup>:** During its premarketing assessment, multiple doses of RISPERDAL<sup>®</sup> were administered to 2607 adult patients with schizophrenia and 1923 pediatric patients in Phase 2 and 3 studies and the following reactions were reported: (Note: frequent adverse events are those occurring in at least 1/100 patients; infrequent adverse events are those occurring in 1/100 to 1/1000 patients. It is important to emphasize that, although the events reported occurred during treatment with RISPERDAL<sup>®</sup>, they were not necessarily caused by it). Serious adverse reactions experienced by the pediatric population were similar to those seen in the adult population (see WARNINGS, PRECAUTIONS, and ADVERSE REACTIONS). **Psychiatric Disorders:** *Frequent:* increased dream activity\*, diminished sexual desire\*, nervousness. *Infrequent:* impaired concentration, depression, apathy, catatonic reaction, euphoria, increased libido, amnesia. **Rare:** emotional lability, nightmares, delirium, withdrawal syndrome, yawning. **Central and Peripheral Nervous System Disorders:** *Frequent:* increased sleep duration\*, *Infrequent:* dysarthria, fatigue, stupor, paraesthesia, confusion. **Rare:** aphasia, cholinergic syndrome, hypoaesthesia, tongue paralysis, leg cramps, torticollis, hypotonia, coma, migraine, hyperreflexia, choreoathetosis. **Gastrointestinal Disorders:** *Frequent:* anorexia, reduced salivation\*. *Infrequent:* flatulence, diarrhea, increased appetite, stomatitis, melena, dysphagia, hemorrhoids, gastritis. **Rare:** fecal incontinence, eructation, gastroesophageal reflux, gastroenteritis, esophagitis, tongue discoloration, cholelithiasis, tongue edema, diverticulitis, gingivitis, discolored feces, GI hemorrhage, hematemesis. **Body as a Whole/General Disorders:** *Frequent:* fatigue. *Infrequent:* edema, rigors, malaise, influenza-like symptoms. **Rare:** pain, enlarged abdomen, allergic reaction, ascites, sarcoidosis, flushing. **Respiratory System Disorders:** *Infrequent:* hyperventilation, bronchospasm, pneumonia, stridor. **Rare:** asthma, increased sputum, aspiration. **Skin and Appendage Disorders:** *Frequent:* increased pigmentation\*, photosensitivity\*. *Infrequent:* increased sweating, acne, decreased sweating, alopecia, hyperkeratosis, pruritus, skin exfoliation. **Rare:** bullous eruption, skin ulceration, aggravated psoriasis, furunculosis, verruca, dermatitis lichenoid, hypertrichosis, genital pruritus, urticaria. **Cardiovascular Disorders:** *Infrequent:* palpitation, hypertension, hypertension, AV block, myocardial infarction. **Rare:** ventricular tachycardia, angina pectoris, premature atrial contractions, T wave inversions, ventricular extrasystoles, ST depression, myocarditis. **Vision Disorders:** *Infrequent:* abnormal accommodation, xerophthalmia. **Rare:** diplopia, eye pain, blepharitis, photopsia, photophobia, abnormal lacrimation. **Metabolic and Nutritional Disorders:** *Infrequent:* hyponatremia, weight increase, creatine phosphokinase increase, thirst, weight decrease, diabetes mellitus. **Rare:** decreased serum iron, cachexia, dehydration, hypokalemia, hypoproteinemia, hyperphosphatemia, hypertriglyceridemia, hyperuricemia, hypoglycemia. **Urinary System Disorders:** *Frequent:* polyuria/polydipsia\*. *Infrequent:* urinary incontinence, hematuria, dysuria. **Rare:** urinary retention, cystitis, renal insufficiency. **Musculo-Skeletal System Disorders:** *Infrequent:* myalgia. **Rare:** arthrosis, synostosis, bursitis, arthritis, skeletal pain. **Reproductive Disorders, Female:** *Frequent:* menorrhagia\*, orgasmic dysfunction\*, dry vagina\*. *Infrequent:* nonneoplastic lactation, amenorrhea, female breast pain, leukorrhea, mastitis, dysmenorrhea, female perineal pain, intermenstrual bleeding, vaginal hemorrhage. **Liver and Biliary System Disorders:** *Infrequent:* increased SGOT, increased SGPT. **Rare:** hepatic failure, cholestatic hepatitis, cholestyils, cholelithiasis, hepatitis, hepatocellular damage. **Platelet, Bleeding, and Clotting Disorders:** *Infrequent:* epistaxis, purpura. **Rare:** hemorrhage, superficial phlebitis, thrombophlebitis, thrombocytopenia. **Hearing and Vestibular Disorders:** **Rare:** tinnitus, hyperacusis, decreased hearing. **Red Blood Cell Disorders:** *Infrequent:* anemia, hypochromic anemia. **Rare:** normocytic anemia. **Reproductive Disorders, Male:** *Frequent:* erectile dysfunction\*. *Infrequent:* ejaculation failure. **White Cell and Resistance Disorders:** *Infrequent:* granulocytopenia. **Rare:** leukocytosis, lymphadenopathy, leucopenia, Pelger-Huet anomaly. **Endocrine Disorders:** **Rare:** gynecomastia, male breast pain, antidiuretic hormone disorder. **Special Senses:** **Rare:** bitter taste. *Incidence based on elicited reports.* **Postintroduction Reports:** Adverse events reported since market introduction which were temporally (but not necessarily causally) related to RISPERDAL<sup>®</sup> therapy include the following: anaphylactic reaction, angioedema, apnea, atrial fibrillation, cerebrovascular disorder, including cerebrovascular accident, diabetes mellitus aggravated, including diabetic ketoacidosis, hypoglycemia, hyperglycemia, intestinal obstruction, jaundice, mania, pancreatitis, Parkinson's disease aggravated, pituitary adenomas, pulmonary embolism, precocious puberty, and QT prolongation. There have been rare reports of sudden death and/or cardiopulmonary arrest in patients receiving RISPERDAL<sup>®</sup>. A causal relationship with RISPERDAL<sup>®</sup> has not been established. It is important to note that sudden and unexpected death may occur in psychotic patients whether they remain untreated or whether they are treated with other antipsychotic drugs.

**DRUG ABUSE AND DEPENDENCE**

**Controlled Substance Class:** RISPERDAL<sup>®</sup> (risperidone) is not a controlled substance.

For more information on symptoms and treatment of overdose, see full Prescribing Information.

7503235SB

Revised December 2006

© Janssen 2003

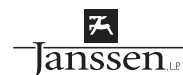

**Visit Booth #1303 at APA's 2007  
Annual Meeting in San Diego to learn about  
LIFETRACK**

LIFETRACK is an exciting new approach to therapy that generates a complete graphic record of every patient. Developed and tested by Dr. Yukio Ishizuka for over 30 years in his private practice, LIFETRACK is made possible through dramatic plots with the speed, accuracy, and convenience of the Internet.

Each day patients complete subjective self-rating graphs on 41 parameters, which encompass the three spheres of personality: Self, Intimacy and Achievement. These graphs document dynamic changes in the patients' psychological state and personality, charting their progress in therapy.

Stop by Booth #1303 at APA's San Diego meeting to learn about free LIFETRACK TeleSeminars and CD testimonials. Sign up for the LIFETRACK Newsletter. Read articles on therapeutic results on 1,170 cases. See LIFETRACK manuals, patient tracking sheets and DVDs. LIFETRACK therapist training TeleWorkshops are also available.

*For information please contact:*

**Yukio Ishizuka M.D.**  
dri@lifetrack.com      www.lifetrack.com  
500 Purchase St., Rye, NY 10580  
Tel: 914-967-6210      Fax: 914-967-5275

Come to LIFETRACK Booth #1303 at APA 2007 Annual Meeting in San Diego to see how LIFETRACK may benefit your practice.

**Osler Institute 116<sup>th</sup> to 122<sup>nd</sup>  
Psychiatry Review Courses**

*approved for AMA/PRA category 1 credit*

**for Written Exams**

May 2-6, 2007 – New York

June 4-8 – Indianapolis

September 5-9 – Milwaukee

**for Oral Boards**

Optional didactic day & 3-day mock orals

May 2 & 3-5 – New York

June 4 & 5-7 – Indianapolis

September 5 & 6-8 – Milwaukee

**for Child and Adolescent**

May 3-6, 2007 – New York

***New – Best of Psych Audio***

**Call Today: (800) 356-7537**

**www.osler.org/y74a**

APA 2007 Annual Meeting Sponsored by the American Psychiatric Association

**WEIGHING THE RISKS AND BENEFITS  
OF ATYPICAL ANTIPSYCHOTICS:**

**CAN WE HAVE OUR CAKE AND EAT IT TOO?**

**SUNDAY, MAY 20, 2007**

**Dinner: 6:30–7:00 PM  
Symposium: 7:00–10:00 PM**

**Manchester Grand Hyatt San Diego  
Douglas Pavilion C/D  
One Market Place  
San Diego, California**

**Agenda**

- 7:00 PM **Opening Remarks**  
*Henry A. Nasrallah, MD – Chairman • University of Cincinnati College of Medicine*
- 7:05 **High Morbidity and Mortality in Schizophrenia and Bipolar Disorder: What, Why, and How?\***  
*Quinton E. Moss, MD • University of Cincinnati College of Medicine*
- 7:35 **Metabolic Complications in the Context of Antipsychotic Effectiveness:  
Lessons from the CATIE Schizophrenia Trial\***  
*Donald C. Goff, MD • Harvard Medical School*
- 8:05 **The Dual Health Jeopardy in Schizophrenia: Highly Prevalent Metabolic Disorders  
and Low Access to Medical Treatment\***  
*Henry A. Nasrallah, MD*
- 8:35 **Lessons From ATP III, the ADA, and the APA Workgroup on Antipsychotics and Metabolic Risk\***  
*John W. Newcomer, MD • Washington University School of Medicine*
- 9:05 **Patient, Provider, and System Approaches to Reducing Risk of Poor Health in  
Patients Receiving Antipsychotics\***  
*Lisa B. Dixon, MD, MPH • University of Maryland School of Medicine, VA Capitol Health Care Network MIRECC*
- 9:35 **Question and Answer**
- 10:00 **Closing Remarks**

**Educational Objectives**

- At the end of this educational activity participants should be able to
1. Review the epidemiological studies demonstrating high rates of morbidity and mortality in schizophrenia and bipolar disorder patients.
  2. Discuss the high prevalence of the metabolic syndrome in the Clinical Antipsychotic Trials of Intervention Effectiveness (CATIE) sample and the low rates of treatment for it.
  3. Compare and contrast the metabolic profiles of antipsychotics in the CATIE study.
  4. Identify potential patient, provider and system level interventions to improve metabolic outcomes among patients treated with antipsychotic medications.

**Accreditation/Support**

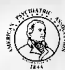

The American Psychiatric Association (APA) is accredited by the Accreditation Council for Continuing Medical Education to provide continuing medical education for physicians.

The APA designates this educational activity of a maximum of 3 *AMA PRA Category 1 Credits*<sup>SM</sup>. Physicians should only claim credit commensurate with the extent of their participation in the activity.

Attendees must be registered for the APA Annual Meeting to attend this symposium. Seating is limited and will be on a first-come, first-served basis. For more information about the meeting, please visit the APA web site at [www.psych.org](http://www.psych.org) or contact the APA toll free at 1-888-357-7924 (within the US or Canada) or 703-907-7300.

Registered conference participants and registered guests may attend an industry supported symposium at the APA meeting.

Co-supported by an educational grant from

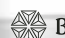

**Bristol-Myers Squibb**

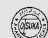

**OTSUKA AMERICA PHARMACEUTICAL, INC.**

\*Each presentation will include 5 minutes for audience questions.

# A POWERFUL SSRI that's well tolerated

#1  
PRESCRIBED  
SRI  
BY PSYCHIATRISTS\*

For **DEPRESSION**  
and **ANXIETY**

**UP TO 90%** of depressed patients  
present with symptoms of anxiety<sup>2</sup>

**PROVEN EFFICACY** for Major Depressive Disorder  
and Generalized Anxiety Disorder<sup>3</sup>

**Lexapro**  
escitalopram oxalate   
**POWER TO ENJOY LIFE™**

**IMPORTANT SAFETY INFORMATION** – Depression is a serious condition that can lead to suicidal thoughts and behavior. Antidepressants increased the risk of suicidal thinking and behavior (2% to 4%) in short-term studies of 9 antidepressant drugs in children and adolescents with major depressive disorder (MDD) and other psychiatric disorders. Patients started on therapy should be observed closely for clinical worsening, suicidality, or unusual changes in behavior, especially at the beginning of therapy or at the time of dose changes. This risk may persist until significant remission occurs. Families and caregivers should be advised of the need for close observation and communication with the prescriber. **Lexapro is not approved for use in pediatric patients.**

Lexapro is contraindicated in patients taking monoamine oxidase inhibitors (MAOIs), pimozone (see DRUG INTERACTIONS – Pimozone and Celexa), or in patients with hypersensitivity to escitalopram oxalate. As with other SSRIs, caution is indicated in the coadministration of tricyclic antidepressants (TCAs) with Lexapro. As with other psychotropic drugs that interfere with serotonin reuptake, patients should be cautioned regarding the risk of bleeding associated with the concomitant use of Lexapro with NSAIDs, aspirin, or other drugs that affect coagulation. The most common adverse events with Lexapro versus placebo (approximately 5% or greater and approximately 2x placebo) were nausea, insomnia, ejaculation disorder, somnolence, increased sweating, fatigue, decreased libido, and anorgasmia.

**References:** 1. IMS National Prescription Audit. Twelve-month rolling average. November 2006. 2. Sadock BJ, Sadock VA. *Kaplan and Sadock's Synopsis of Psychiatry: Behavioral Sciences/Clinical Psychiatry*. 9th ed. Philadelphia, Pa: Lippincott Williams & Wilkins; 2003:552. 3. LEXAPRO [package insert]. St Louis, Mo: Forest Pharmaceuticals, Inc.; 2006.

Please see brief summary of prescribing information for LEXAPRO on following page.



# KNOW THE FACTS

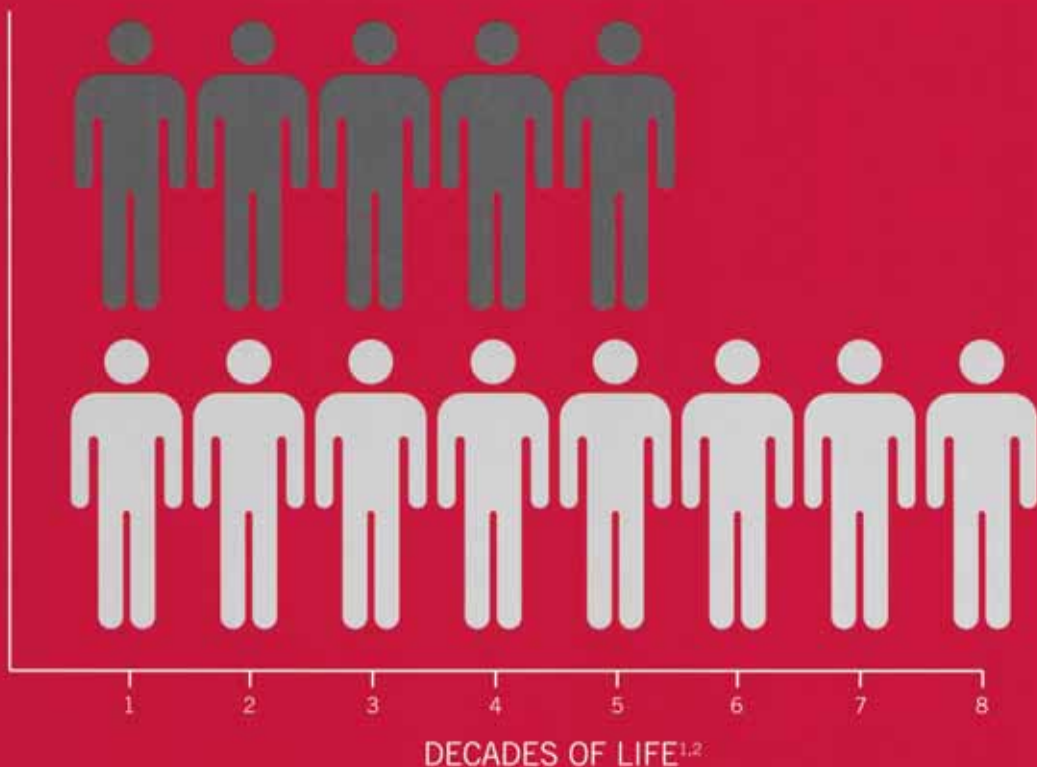

**People with severe mental illness die up to 3 decades earlier, on average, than the general population.<sup>1,2</sup>**

Be aware.  
Screen and monitor your patients.  
Make a difference.

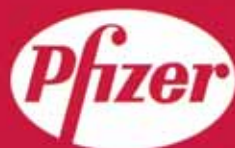

# KNOW THE FACTS

Heart disease is a leading cause of death in patients with severe mental illness.<sup>1,2</sup>

Major risk factors include<sup>3</sup>

- Weight gain
- Diabetes
- High blood pressure
- High cholesterol
- Smoking

Be aware.

Screen and monitor your patients.  
Make a difference.

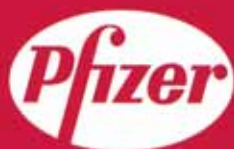

**References:** 1. Colton CW, Manderscheid RW. Congruencies in increased mortality rates, years of potential life lost, and causes of death among public mental health clients in eight states. *Prev Chronic Dis* [serial online]. 2006 April;3(2). Available at: [http://www.cdc.gov/pccd/issues/2006/apr/05\\_0180.htm](http://www.cdc.gov/pccd/issues/2006/apr/05_0180.htm). Accessed December 7, 2006. 2. Miller BJ, Paschall CB III, Svendsen DP. Mortality and medical comorbidity among patients with serious mental illness. *Psychiatr Serv*. 2006;57:1482-1487. 3. *Third Report of the National Cholesterol Education Program (NCEP) Expert Panel on Detection, Evaluation, and Treatment of High Blood Cholesterol in Adults (Adult Treatment Panel III) Executive Summary*. Bethesda, Md: National Institutes of Health, National Heart, Lung, and Blood Institute; 2001. NIH publication 01-3670.

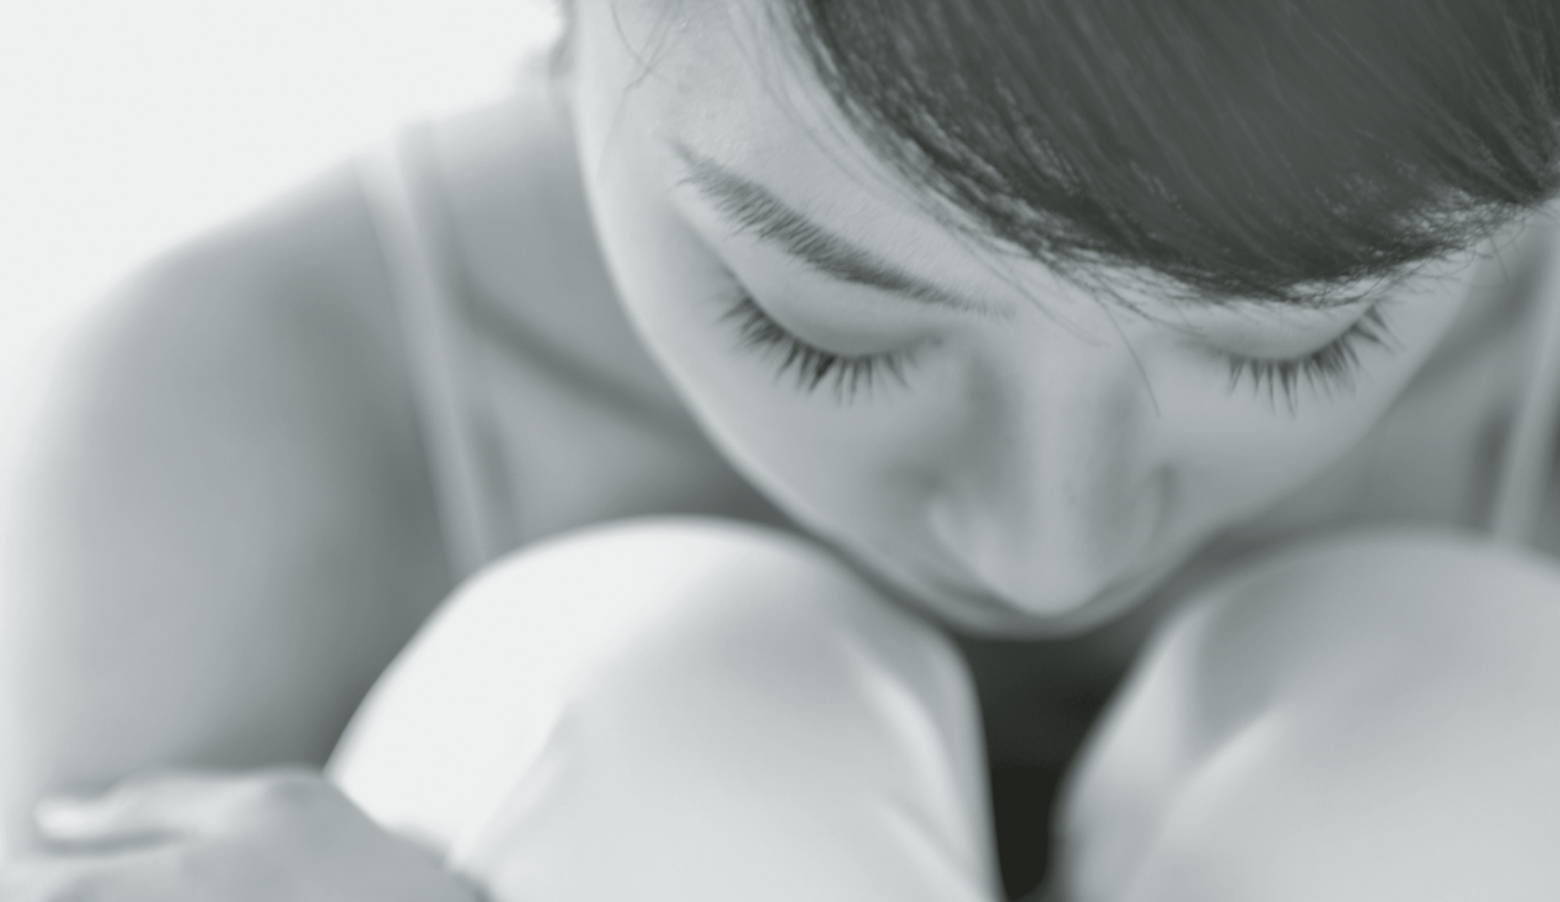

## Our best minds are focused on new treatments in psychiatry.

Knowledge transforms, illuminates, and unlocks the door to the science of mental illness. Over the past 30 years, UPMC's Western Psychiatric Institute and Clinic (WPIC) has set the standard for innovative clinical care including pioneering short- and long-term treatment approaches. We have incorporated both pharmacologic and psychotherapeutic regimens that are standards of care in behavioral health today. As the number one recipient of federal psychiatric research funding and with a history of clinical advances, our psychiatrists' findings have informed their colleagues' practices across the country. WPIC clinicians and researchers have shed light on mental illness across the lifespan and have created new tools for managing pervasive developmental disorders, addictions, mood and anxiety disorders, geriatric psychiatry, and eating disorders. Our specialized clinical programs tackle the most complex cases, with teams who specialize in psychiatry, psychopharmacology, clinical psychology, and neurology assessing and crafting complete, individualized procedure plans. WPIC psychiatrists provide treatment based on current scientific advances so those with mental illness can live healthier and more productive lives.

# UPMC

Affiliated with the **University of Pittsburgh**, UPMC is ranked among the nation's best hospitals by *U.S. News & World Report*.  
[www.upmc.com](http://www.upmc.com) | 1-800-533-UPMC



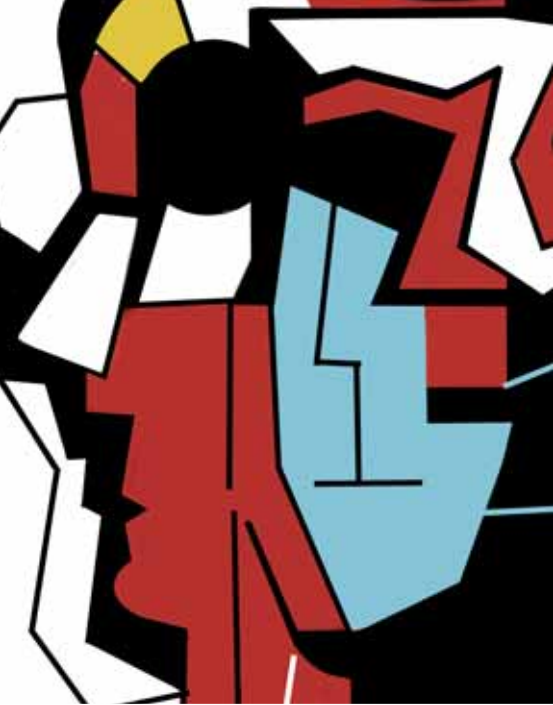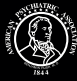

Sponsored by the American  
Psychiatric Association

Supported by an  
educational grant from  
**AstraZeneca**

This program will be conducted on May 20, 2007, during the APA 2007 Annual Meeting

# RETHINKING BIPOLAR DISORDER: IMPLICATIONS OF COMORBIDITIES

**SUNDAY, MAY 20, 2007**

Lunch: 1:00–1:30 PM • Symposium: 1:30–4:30 PM

Elizabeth Ballroom A–E, Second Level • Manchester Grand Hyatt San Diego  
**SAN DIEGO, CALIFORNIA**

## AGENDA

1:00–1:30 PM Lunch

1:30–1:40 PM Welcome and Introductions  
**GARY S. SACHS, MD (CHAIRPERSON)**  
Massachusetts General Hospital

1:40–2:10 PM Medical Comorbidities With Bipolar Disorder  
**GARY S. SACHS, MD**  
Massachusetts General Hospital

2:10–2:40 PM Comorbid Substance Abuse in Bipolar Disorder  
**MICHAEL J. OSTACHER, MD, MPH**  
Massachusetts General Hospital

2:40–3:10 PM Suicidality as a Component of Bipolar Disorder  
**LAUREN B. MARANGELL, MD**  
Baylor College of Medicine

3:10–3:40 PM Posttraumatic Stress Disorder and Bipolar  
Disorder: Critical Overlaps and Possible Links  
in Pathology and Treatment  
**LORI L. DAVIS, MD**  
University of Alabama School of Medicine

3:40–4:10 PM Neuroimaging of Dual Diagnoses  
**STEPHEN M. STRAKOWSKI, MD**  
University of Cincinnati College of Medicine

4:10–4:30 PM Question and Answer Session  
**ALL FACULTY**

4:30 PM Adjourn

Each presentation will conclude with  
a 5-minute panel discussion.

## LEARNING OBJECTIVES

After attending this symposium, participants  
should be able to:

- Understand the general medical comorbidities associated with bipolar disorder, in particular the association of inflammatory markers in bipolar disorder
- Understand the significance of high rates of comorbidity between bipolar disorder and alcohol and substance abuse and emerging data on treatment strategies
- Be aware of the assessment techniques for evaluation of suicide in bipolar disorder and evidence-based treatment options
- Recognize the many potential relationships between trauma and bipolar disorder and the prognostic significance of posttraumatic stress disorder in bipolar patients
- Examine the findings in brain regions of interest related to bipolar disorder and common comorbidities

## CME STATEMENT

This symposium will be conducted on May 20, 2007, during the APA 2007 Annual Meeting. The American Psychiatric Association (APA) is accredited by the Accreditation Council for Continuing Medical Education to provide continuing medical education for physicians.

The APA designates this educational activity for a maximum of 3 *AMA PRA Category 1 Credits*<sup>™</sup>. Physicians should only claim credit commensurate with the extent of their participation in the activity. Attendees must be registered for the APA 2007 Annual Meeting to attend this symposium. Seating is limited and will be based on first-come, first-served. For more information about the meeting, please visit the APA Web site at [www.psych.org](http://www.psych.org) or contact the APA toll free at 1-888-357-7924 (within the US or Canada) or 703-907-7300.

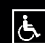

If any participant in this educational activity is in need of accommodations, please call 860-434-1650 by May 1, 2007, in order to receive service.

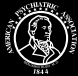

Sponsored by the American  
Psychiatric Association

Supported by an  
educational grant from  
**AstraZeneca** 

This program will be conducted on May 21 and 22, 2007 during the APA 2007 Annual Meeting

# TREATING THE SPECTRUM OF BIPOLAR DISORDERS: AN INTERACTIVE CASE DISCUSSION

**MONDAY, MAY 21 AND TUESDAY, MAY 22, 2007**

Breakfast: 6:30–7:00 AM • Symposium: 7:00–8:30 AM

Elizabeth Ballroom A–E, Second Level • Manchester Grand Hyatt San Diego  
**SAN DIEGO, CALIFORNIA**

## AGENDA

### MONDAY, MAY 21, 2007

- 6:30–7:00 AM Breakfast
- 7:00–7:05 AM Welcome and Introductions  
**MICHAEL E. THASE, MD  
(CHAIRPERSON)**  
University of Pennsylvania School of Medicine
- 7:05–7:20 AM Psychotherapy and Bipolar Disorder:  
Does Talking Make a Difference?  
**HOLLY A. SWARTZ, MD**  
University of Pittsburgh
- 7:20–7:35 AM Case Scenario Discussion with  
Audience Interaction  
**ALL FACULTY**
- 7:35–7:50 AM Antidepressants in Bipolar Depression:  
A Two-Sided Story  
**MICHAEL E. THASE, MD**
- 7:50–8:05 AM Case Scenario Discussion with  
Audience Interaction  
**ALL FACULTY**
- 8:05–8:30 AM Question and Answer Session  
**ALL FACULTY**
- 8:30 AM Adjourn

### TUESDAY, MAY 22, 2007

- 6:30–7:00 AM Breakfast
- 7:00–7:05 AM Welcome and Introductions  
**MICHAEL E. THASE, MD  
(CHAIRPERSON)**
- 7:05–7:20 AM Beyond Antidepressants: Treatment  
Options for Bipolar Depression  
**ROGER S. McINTYRE, MD**  
University of Toronto
- 7:20–7:35 AM Case Scenario Discussion with  
Audience Interaction  
**ALL FACULTY**
- 7:35–7:50 AM Treating and Preventing Mania  
**LAUREN B. MARANGELL, MD**  
Baylor College of Medicine
- 7:50–8:05 AM Case Scenario Discussion with  
Audience Interaction  
**ALL FACULTY**
- 8:05–8:30 AM Question and Answer Session  
**ALL FACULTY**
- 8:30 AM Adjourn

## LEARNING OBJECTIVES

After attending this symposium, participants should be able to:

- Examine the role of psychotherapy in the management of patients with bipolar disorder with an emphasis on empirical data demonstrating its efficacy as adjunctive treatment for bipolar depression
- Review the implications of antidepressants in bipolar depression and the importance of differential diagnosis in patients with bipolar disorder with regard to treatment
- Identify and evaluate current and future treatment options and the optimal approach in the pharmacotherapy of patients with bipolar depression
- Formulate management strategies for the treatment of mania and discuss successful methods of intervention aimed at preventing mania

## CME STATEMENT

This symposium will be conducted on May 21, 2007 and May 22, 2007, during the APA 2007 Annual Meeting. The American Psychiatric Association (APA) is accredited by the Accreditation Council for Continuing Medical Education to provide continuing medical education for physicians.

The APA designates this educational activity for a maximum of 3 *AMA PRA Category 1 Credits*<sup>™</sup>. Physicians should only claim credit commensurate with the extent of their participation in the activity. Attendees must be registered for the APA 2007 Annual Meeting to attend this symposium. Seating is limited and will be based on first-come, first-served. For more information about the meeting, please visit the APA Web site at [www.psych.org](http://www.psych.org) or contact the APA toll free at 1-888-357-7924 (within the US or Canada) or 703-907-7300.

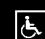

If any participant in this educational activity is in need of accommodations, please call 860-434-1650 by May 1, 2007, in order to receive service.

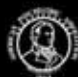

Sponsored by the American  
Psychiatric Association

Supported by an  
educational grant from  
**AstraZeneca**

This program will be conducted on May 21, 2007, during the APA 2007 Annual Meeting

# WHEN ENDOCRINOLOGY AND PSYCHIATRY COLLIDE:

WHAT THE CLINICIAN NEEDS TO KNOW ABOUT  
ANTIPSYCHOTIC-INDUCED ENDOCRINE  
DISTURBANCES

**MONDAY, MAY 21, 2007**

Dinner: 6:30–7:00 PM • Symposium: 7:00–10:00 PM

Elizabeth Ballroom A–E, Second Level • Manchester Grand Hyatt San Diego  
**SAN DIEGO, CALIFORNIA**

## AGENDA

- 6:30–7:00 PM Dinner
- 7:00–7:10 PM Welcome and Introductions  
**PETER F. BUCKLEY, MD (CHAIRPERSON)**  
Medical College of Georgia
- 7:10–7:35 PM Increasing Global Burden of Cardiovascular  
Disease in General Populations and Patients  
with Schizophrenia  
**CHARLES H. HENNEKENS,  
MD, PhD, MPH, MS**  
Florida Atlantic University
- 7:35–8:00 PM Diabetes and the Metabolic Syndrome:  
From Soup to Nuts  
**RAMACHANDIRAN COOPAN,  
MBChB, FRCP, FACE**  
Harvard Medical School
- 8:00–8:25 PM Antipsychotics, Diabetes, and the Metabolic  
Syndrome: What Is the Strength of These  
Relationships?  
**JOHN W. NEWCOMER, MD**  
Washington University School of Medicine
- 8:25–8:50 PM Prolactin Elevation and Antipsychotic Therapy:  
What to Tell Patients About Risks to Bones and  
Sexual Functioning  
**MEERA NARASIMHAN, MD**  
University of South Carolina School of Medicine
- 8:50–9:15 PM Guidelines for the Management of Metabolic  
and Endocrine Side Effects: Confusion or  
Consensus?  
**PETER F. BUCKLEY, MD**
- 9:15–10:00 PM Panel Discussion  
**ALL FACULTY**
- 10:00 PM Adjourn

## LEARNING OBJECTIVES

After attending this symposium, participants should be able to:

- Discuss the epidemiologic relationship between cardiovascular disease and schizophrenia, and the importance of the aggressive management of cardiovascular disease risk factors in this population group
- Employ the current state of medical knowledge about diabetes mellitus and the metabolic syndrome
- Complete risk analysis for diabetes and the metabolic syndrome during antipsychotic therapy
- Describe the clinical impact of raised prolactin, both upon sexual functioning and also the longer term risk for osteoporosis during antipsychotic therapy
- Develop management strategies as well as emergent new lifestyle behavioral approaches to minimize the risk of antipsychotic-induced endocrine adverse effects and to deal with these effectively when they emerge during treatment

## CME STATEMENT

This symposium will be conducted on May 21, 2007, during the APA 2007 Annual Meeting. The American Psychiatric Association (APA) is accredited by the Accreditation Council for Continuing Medical Education to provide continuing medical education for physicians.

The APA designates this educational activity for a maximum of 3 AMA PRA Category 1 Credits™. Physicians should only claim credit commensurate with the extent of their participation in the activity. Attendees must be registered for the APA 2007 Annual Meeting to attend this symposium. Seating is limited and will be based on first-come, first-served. For more information about the meeting, please visit the APA Web site at [www.psych.org](http://www.psych.org) or contact the APA toll free at 1-888-357-7924 (within the US or Canada) or 703-907-7300.

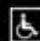

If any participant in this educational activity is in need of accommodations, please call 860-434-1650 by May 1, 2007, in order to receive service.

# **METABOLIC CONCERNS: You Can Make A Difference**

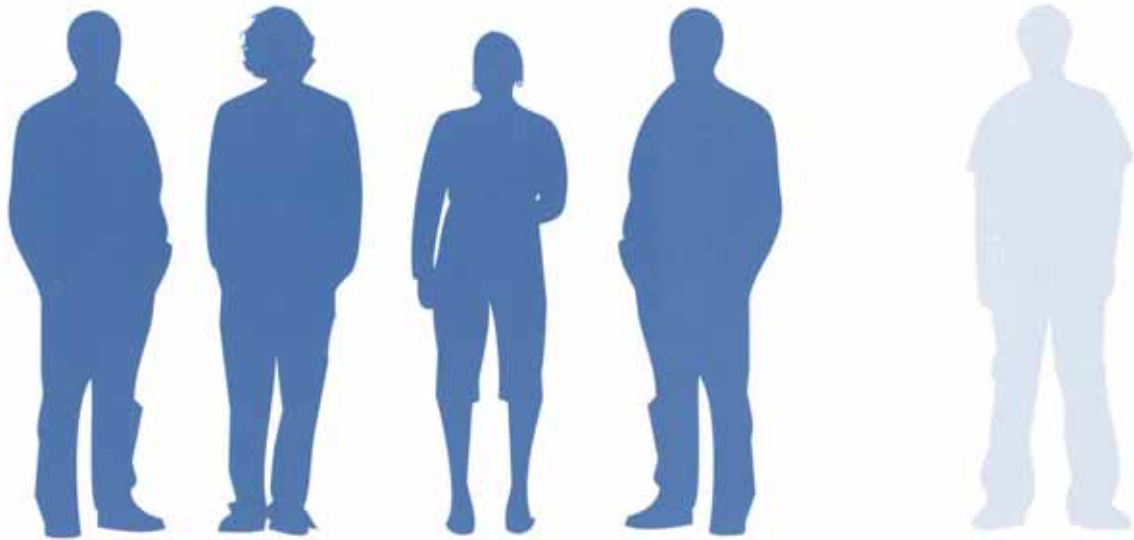

**In the landmark CATIE  
schizophrenia study, diabetes  
was 4 times more common  
in patients at baseline than  
in the general population.<sup>1</sup>**

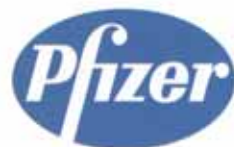

# IN SCHIZOPHRENIA...

# Choose GEODON—treat

## CHOOSE COMPARABLE POWER...

*Consistent results in acute head-to-head studies<sup>2-4</sup>*

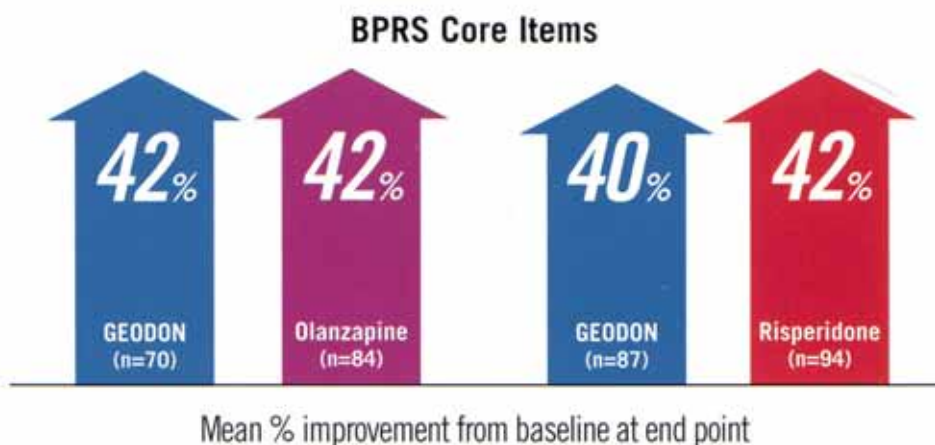

A 6-week, double-blind, randomized study of GEODON vs olanzapine and an 8-week, double-blind, randomized study of GEODON vs risperidone.

- BPRS core items include hallucinatory behavior, unusual thought content, conceptual disorganization, and suspiciousness
- Comparable efficacy was maintained in double-blind extension studies
  - up to 1 year vs risperidone<sup>2</sup>
  - up to 6 months vs olanzapine<sup>5</sup>

GEODON is indicated for the treatment of schizophrenia.

**Elderly patients with dementia-related psychosis treated with atypical antipsychotic drugs are at an increased risk of death compared to placebo. GEODON is not approved for the treatment of patients with dementia-related psychosis.**

**GEODON is contraindicated in patients with a known history of QT prolongation, recent acute myocardial infarction, or uncompensated heart failure, and should not be used with other QT-prolonging drugs. GEODON has a greater capacity to prolong the QT<sub>C</sub> interval than several antipsychotics. In some drugs, QT prolongation has been associated with torsade de pointes, a potentially fatal arrhythmia. In many cases this would lead to the conclusion that other drugs should be tried first.**

Hyperglycemia-related adverse events, sometimes serious, have been reported in patients treated with atypical antipsychotics. There have been few reports of hyperglycemia or diabetes in patients treated with GEODON, and it is not known if GEODON is associated with these events. Patients treated with an atypical antipsychotic should be monitored for symptoms of hyperglycemia.

In short-term schizophrenia trials, 10% of GEODON-treated patients experienced a weight gain of  $\geq 7\%$  of body weight vs 4% for placebo. In the same short-term trials, the most common adverse events were somnolence (14%) and respiratory tract infection (8%).

# with the body in mind

...WITHOUT COMPROMISING METABOLIC PARAMETERS

*Significant results in switch studies after 1 year<sup>2,6</sup>*

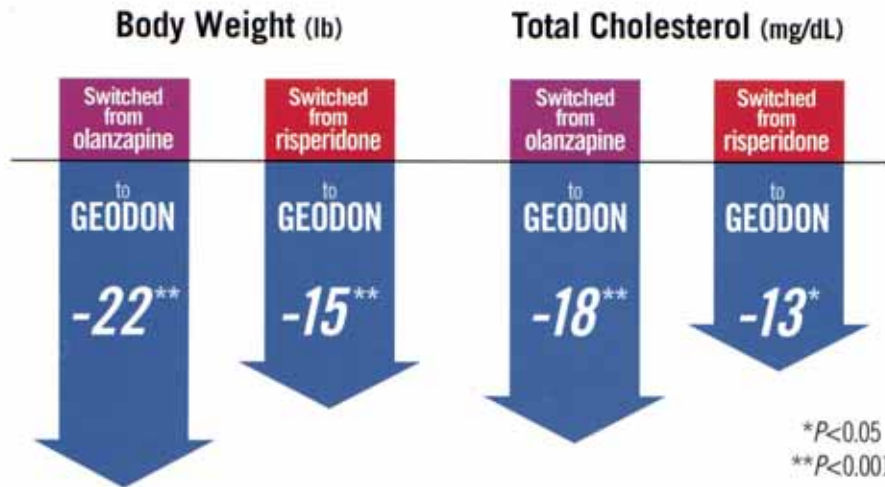

Two 1-year open-label extensions of 6-week, open-label switch studies in patients suboptimally controlled due to partial response or poor tolerability.

- Patients switching to GEODON from olanzapine and risperidone also experienced reductions in triglycerides<sup>6</sup>

*In the acute head-to-head studies...*

- In the GEODON vs olanzapine study, olanzapine significantly increased body weight (8 lb vs 2 lb for GEODON,  $P<0.0001$ )<sup>2,3</sup>
- In the GEODON vs risperidone study, risperidone increased body weight (2 lb vs 0 lb for GEODON,  $P<0.01$ )<sup>2,4</sup>

**GEODON**<sup>®</sup>  
(ziprasidone HCl) **Oral Capsules**

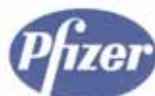

*Please see brief summary of prescribing information on adjacent page.*



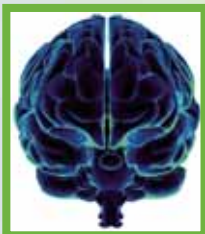

# CARING for OUR MOST CHALLENGING PATIENTS with DEPRESSION: *An Interactive Forum on Novel Treatments*

PRESENTED AT THE APA 2007 ANNUAL MEETING IN SAN DIEGO, CA

Sunday, May 20, 2007 • 1:30 p.m.– 4:30 pm  
Manchester Grand Hyatt, Manchester Ballroom, Second Level

## CREDIT DESIGNATION

The APA designates this educational activity for a maximum of 3 AMA PRA Category 1 Credits™. Physicians should only claim credit commensurate with the extent of their participation in the activity.

## ACCREDITATION STATEMENT

The American Psychiatric Association (APA) is accredited by the Accreditation Council for Continuing Medical Education to provide continuing medical education for physicians.

## REGISTRATION

Attendees must be registered for the APA Annual Meeting to attend this symposium. Seating is limited and will be based on first-come, first-served. For more information about the meeting, please visit the APA website at [www.psych.org](http://www.psych.org) or contact the APA toll-free at 1-888-357-7924 (within the U.S. or Canada) or 703-907-7300.

## PROGRAM AGENDA

- 1:00 p.m. **Lunch**
- 1:30 p.m. **Introduction**  
Charles B. Nemeroff, MD, PhD (Chair)  
*Emory University School of Medicine*
- 1:45 p.m. **Mechanism of Action of Vagus Nerve Stimulation (VNS)**  
Charles B. Nemeroff, MD, PhD  
*Emory University School of Medicine*
- 2:15 p.m. **Assessing the Efficacy of VNS in Patients with TRD**  
Paul Holtzheimer, MD  
*Emory University School of Medicine*
- 2:45 p.m. **Efficacy of Repetitive Transcranial Magnetic Stimulation (rTMS) and Magnetic Seizure Therapy (MST)**  
Thomas E. Schlaepfer, MD  
*University of Bern*  
*Johns Hopkins Medical School*
- 3:15 p.m. **Mechanism of Action and Efficacy of Deep Brain Stimulation**  
Helen Mayberg, MD  
*Emory University School of Medicine*
- 3:45 p.m. **Panel Discussion/Q&A**
- 4:30 p.m. **Conclusion**

## LEARNING OBJECTIVES

At the conclusion of this symposium, the participant should be able to:

1. Identify criteria used to recognize patients with treatment-resistant depression (TRD).
2. Compare and contrast somatic interventions for TRD.
3. Recognize the neurobiological substrates of investigational treatments for refractory depression.

Supported by an educational grant from

**Cyberonics®**

Sponsored by the American Psychiatric Association

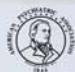



The effect of  
Agitation...

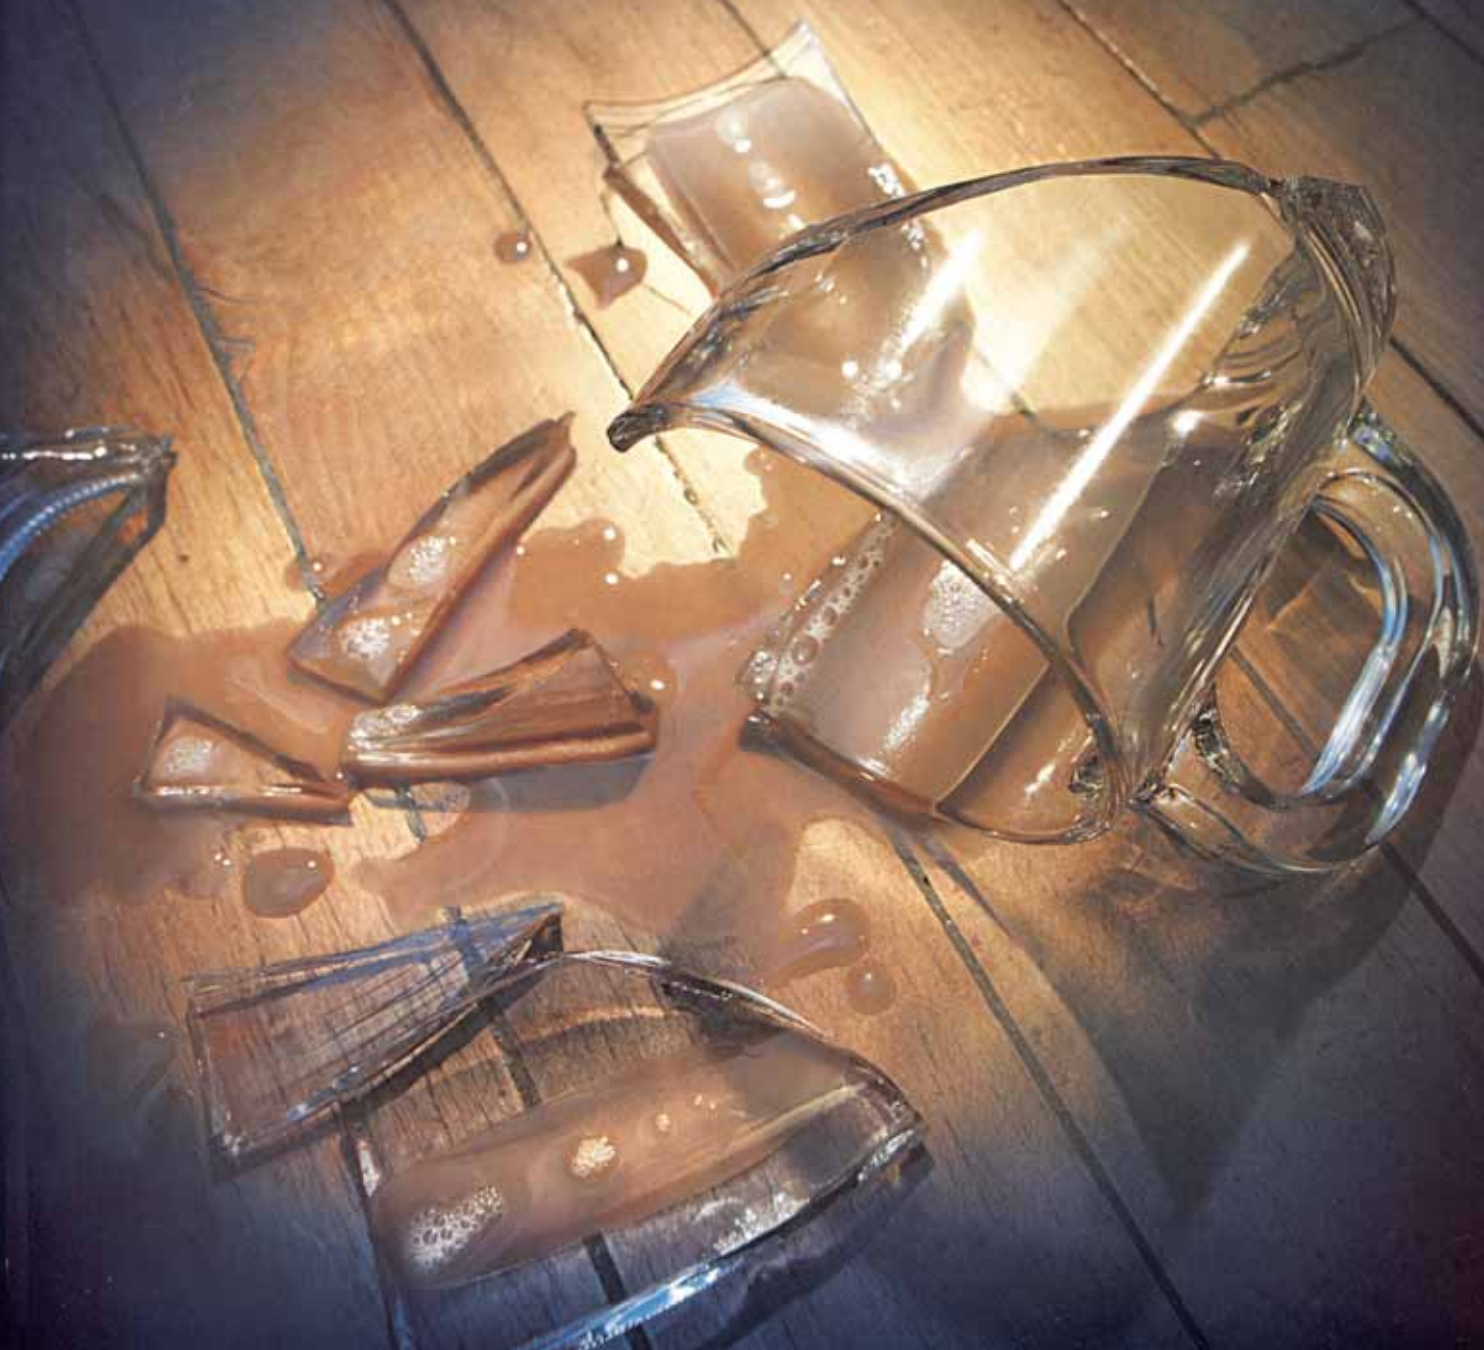

A man and a woman are seated at a dark wooden table, engaged in conversation. The man, on the right, is wearing a dark sweater and looking towards the woman. The woman, on the left, has long dark hair and is wearing a blue top. On the table are several glasses of coffee and a glass of milk. In the background, a large window looks out onto a bright, sunny landscape with green hills, trees, and a blue sky. A large, stylized blue letter 'A' is superimposed on the landscape, with a blue path leading towards it.

# The effect of a start toward long-term symptom control

Physicians who elect to use ABILIFY for extended periods should periodically re-evaluate the long-term usefulness of the drug for the individual patient.

In schizophrenia or bipolar mania

# ABILIFY® (aripiprazole) Injection Rapidly Controls Agitation<sup>1</sup>

Significant reduction in symptoms of agitation in schizophrenia  
as measured by PANSS™-EC score\*

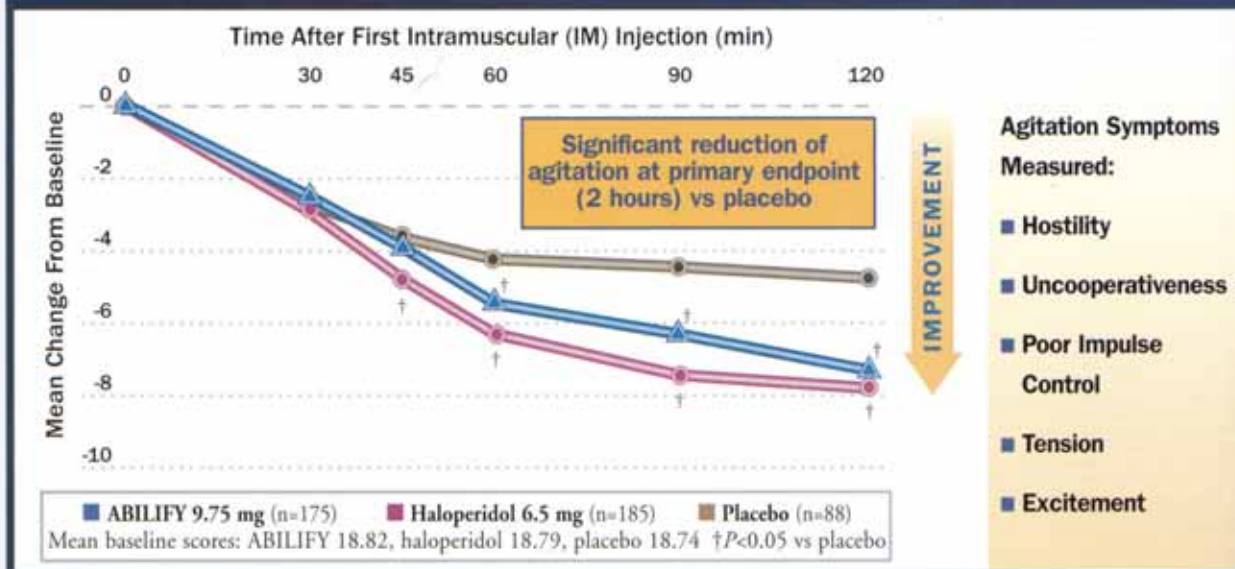

Adapted from Andrezina et al. *Psychopharmacology (Berl)*. 2006.

\*Last observation carried forward.

See study description on next page.

PANSS™-EC=Positive and Negative Syndrome Scale Excited Component.

PANSS™ is a trademark of Multi-Health Systems, Inc.

ABILIFY Injection is indicated for the treatment of agitation associated with schizophrenia or bipolar mania

ABILIFY is also indicated for the treatment of schizophrenia including maintaining stability in patients who had been symptomatically stable on other antipsychotic medications for periods of 3 months or longer and observed for relapse during a period of up to 26 weeks.

Elderly patients with dementia-related psychosis treated with atypical antipsychotic drugs are at an increased risk (1.6 to 1.7 times) of death compared to placebo (4.5% vs 2.6%, respectively). ABILIFY is not approved for the treatment of patients with dementia-related psychosis.

Please see IMPORTANT SAFETY INFORMATION, including **Boxed WARNING**, on next page.

  
ABILIFY®  
(aripiprazole)  
INJECTION 9.75 mg/1.3 mL

HELP ILLUMINATE THE PERSON WITHIN

## IMPORTANT SAFETY INFORMATION for ABILIFY® (aripiprazole)

Elderly patients with dementia-related psychosis treated with atypical antipsychotic drugs are at an increased risk (1.6 to 1.7 times) of death compared to placebo (4.5% vs 2.6%, respectively). ABILIFY is not approved for the treatment of patients with dementia-related psychosis (see Boxed WARNING).

- **Neuroleptic malignant syndrome (NMS)**—As with all antipsychotic medications, a rare and potentially fatal condition known as NMS has been reported with ABILIFY. NMS can cause hyperpyrexia, muscle rigidity, diaphoresis, tachycardia, irregular pulse or blood pressure, cardiac dysrhythmia, and altered mental status. If signs and symptoms appear, immediate discontinuation is recommended.
- **Tardive dyskinesia (TD)**—The risk of developing TD and the potential for it to become irreversible may increase as the duration of treatment and the total cumulative dose increase. Prescribing should be consistent with the need to minimize TD. If signs and symptoms appear, discontinuation should be considered since TD may remit, partially or completely.
- **Cerebrovascular adverse events** (eg, stroke, transient ischemic attack), including fatalities, have been reported at an increased incidence in clinical trials of elderly patients with dementia-related psychosis treated with ABILIFY.

- **Hyperglycemia and diabetes mellitus**—Hyperglycemia, in some cases associated with ketoacidosis, coma, or death, has been reported in patients treated with atypical antipsychotics including ABILIFY. Patients with diabetes should be monitored for worsening of glucose control; those with risk factors for diabetes should undergo baseline and periodic fasting blood glucose testing. Patients who develop symptoms of hyperglycemia should also undergo fasting blood glucose testing. There have been few reports of hyperglycemia with ABILIFY.

### Treatment-emergent adverse events reported with: ABILIFY Oral

In short-term trials of patients with schizophrenia (up to 6 weeks) or bipolar disorder (up to 3 weeks), the following were reported at an incidence  $\geq 10\%$  and greater than placebo, respectively: headache (30% vs 25%), anxiety (20% vs 17%), insomnia (19% vs 14%), nausea (16% vs 12%), vomiting (12% vs 6%), dizziness (11% vs 8%), constipation (11% vs 7%), dyspepsia (10% vs 8%), and akathisia (10% vs 4%).

### ABILIFY Injection

In short-term (24 hour) trials, the following were reported at an incidence  $\geq 5\%$  and greater than placebo, respectively: headache (12% vs 7%), nausea (9% vs 3%), dizziness (8% vs 5%), and somnolence (7% vs 4%).

## ABILIFY® (aripiprazole) offers your patients:

- Rapid control of agitation\*<sup>1</sup>
- Early and sustained symptom control
- Low potential of unwanted sedation
- Favorable weight and lipid profile
  - In a 52-week schizophrenia trial, the percentage of patients with  $\geq 7\%$  increase in baseline body weight was 30% for those with BMI  $< 23$ , 19% for those with BMI 23 to 27, and 8% for those with BMI  $> 27$ .

\*With ABILIFY Injection at primary endpoint (2 hours).

Physicians who elect to use ABILIFY for extended periods should periodically re-evaluate the long-term usefulness of the drug for the individual patient.

#### Study Description:

Double-blind, placebo-controlled, randomized, multicenter study conducted with 448 patients. If needed, concomitant benzodiazepine (lorazepam [4 mg/day] or equivalent) could be administered at least 60 minutes after the second injection. After completing the 24-hour IM phase, patients received blinded oral tablet study medication corresponding to their initial treatment arm for 4 days. Patients randomized to aripiprazole or placebo during the 24-hour IM phase received 15-mg aripiprazole oral tablets (with the option of decreasing to 10-mg aripiprazole based on clinical judgment).

#### References:

1. Andrezina R, Josiassen RC, Marcus RN, et al. Intramuscular aripiprazole for the treatment of acute schizophrenia or schizoaffective disorder: a double-blind, placebo-controlled comparison with intramuscular haloperidol. *Psychopharmacology (Berl)*. 2006;188:281-292.

Please see accompanying Brief Summary of FULL PRESCRIBING INFORMATION, including Boxed WARNING, for ABILIFY on following pages.

 Bristol-Myers Squibb  Otsuka America Pharmaceutical, Inc.

©2007 Otsuka America Pharmaceutical, Inc., Rockville, MD

570US07AB00102 February 2007 AP444K70/02-07 Printed in USA  Printed on recycled paper.

**ABILIFY® (aripiprazole) TABLETS**  
**ABILIFY® (aripiprazole) ORAL SOLUTION**  
**ABILIFY® DISCMELT™ (aripiprazole) Orally Disintegrating Tablets**  
**ABILIFY® (aripiprazole) INJECTION FOR INTRAMUSCULAR USE ONLY**  
**BRIEF SUMMARY: PLEASE CONSULT PACKAGE INSERT FOR COMPLETE PRESCRIBING INFORMATION.**

Rx only

**INCREASED MORTALITY IN ELDERLY PATIENTS WITH DEMENTIA-RELATED PSYCHOSIS**

Elderly patients with dementia-related psychosis treated with atypical antipsychotic drugs are at an increased risk of death compared to placebo. Analyses of seventeen placebo-controlled trials (modal duration of 10 weeks) in these patients revealed a risk of death in the drug-treated patients of between 1.6 to 1.7 times that seen in placebo-treated patients. Over the course of a typical 10-week controlled trial, the rate of death in drug-treated patients was about 4.5%, compared to a rate of about 2.6% in the placebo group. Although the causes of death were varied, most of the deaths appeared to be either cardiovascular (eg, heart failure, sudden death) or infectious (eg, pneumonia) in nature. ABILIFY is not approved for the treatment of patients with dementia-related psychosis.

**CONTRAINDICATIONS:** Known hypersensitivity to aripiprazole

**WARNINGS: Increased Mortality in Elderly Patients With Dementia-Related Psychosis** - Elderly patients with dementia-related psychosis treated with atypical antipsychotic drugs are at an increased risk of death compared to placebo. ABILIFY (aripiprazole) is not approved for the treatment of patients with dementia-related psychosis (see **Boxed WARNING**).

**Neuroleptic Malignant Syndrome (NMS):** Potentially fatal NMS has been reported in association with administration of antipsychotic drugs, including ABILIFY. Clinical manifestations of NMS are hyperreflexia, muscle rigidity, altered mental status, and evidence of autonomic instability (irregular pulse or blood pressure, tachycardia, diaphoresis, and cardiac dysrhythmia). Additional signs may include elevated creatine phosphokinase, myoglobinuria (rhabdomyolysis), and acute renal failure. If signs and symptoms appear, immediate discontinuation is recommended (see **Full Prescribing Information** for additional information on management of NMS). Patients requiring antipsychotic drug treatment after recovery from NMS should be carefully monitored since recurrences of NMS have been reported.

**Tardive Dyskinesia (TD):** Potentially irreversible TD may develop in patients treated with antipsychotic drugs. Although the prevalence of TD appears to be highest among the elderly, especially elderly women, it is impossible to predict which patients are more likely to develop the syndrome. The risk of developing TD and the potential for it to become irreversible may increase as the duration of treatment and the total cumulative dose increase. Prescribing should be consistent with the need to minimize TD. If signs and symptoms appear, discontinuation should be considered since TD may remit, partially or completely. Antipsychotic treatment, itself, may suppress (or partially suppress) the signs and symptoms of the syndrome and, thereby, may possibly mask the underlying process. Chronic antipsychotic treatment should generally be reserved for patients who suffer from a chronic illness that (1) is known to respond to antipsychotic drugs, and (2) for whom alternative, equally effective, but potentially less harmful treatments are not available or appropriate. The need for continued treatment should be reassessed periodically.

**Cerebrovascular Adverse Events, Including Stroke, in Elderly Patients with Dementia-Related Psychosis:** In placebo-controlled clinical studies (two flexible-dose and one fixed-dose study) of dementia-related psychosis, there was an increased incidence of cerebrovascular adverse events (eg, stroke, transient ischemic attack), including fatalities, in aripiprazole-treated patients. In the fixed-dose study, there was a statistically significant dose response relationship for cerebrovascular adverse events in patients treated with aripiprazole. ABILIFY is not approved for the treatment of patients with dementia-related psychosis. (See also **Boxed WARNING, WARNINGS and PRECAUTIONS** in **Full Prescribing Information**.)

**Hyperglycemia and Diabetes Mellitus:** Hyperglycemia, in some cases associated with ketoacidosis, hyperosmolar coma or death, has been reported in patients treated with atypical antipsychotics including ABILIFY. Assessment of the relationship between atypical antipsychotic use and glucose abnormalities is complicated by the possibility of an increased background risk of diabetes mellitus in patients with schizophrenia and the increasing incidence of diabetes mellitus in the general population. Patients diagnosed with diabetes who are started on atypical antipsychotics should be monitored regularly for worsening of glucose control; patients with risk factors for diabetes should undergo baseline and periodic fasting blood glucose (FBG) testing. Any patient being treated with an atypical antipsychotic should be monitored for symptoms of hyperglycemia and those who develop symptoms of hyperglycemia should also undergo FBG testing.

**PRECAUTIONS: General:**

**Orthostatic Hypotension:** ABILIFY may be associated with orthostatic hypotension, perhaps due to its  $\alpha_1$ -adrenergic receptor antagonism. The incidence of orthostatic hypotension-associated events from five short-term, placebo-controlled trials in schizophrenia (n=926) on oral ABILIFY included: orthostatic hypotension (1.9%), postural dizziness (0.8%), and syncope (0.6%). The incidence of orthostatic hypotension-associated events from short-term, placebo-controlled trials in bipolar mania (n=597) on oral ABILIFY included: orthostatic hypotension (0.7%), postural dizziness (0.5%), and syncope (0.3%). The incidence of orthostatic hypotension-associated events from short-term, placebo-controlled trials in agitation associated with schizophrenia or bipolar mania (n=501) on ABILIFY injection included: orthostatic hypotension (0.6%), postural dizziness (0.2%), and syncope (0.4%). The incidence of a significant orthostatic change in blood pressure (defined as a decrease of at least 30 mmHg in systolic blood pressure when changing from a supine to standing position) for aripiprazole was not statistically different from placebo in trials in patients with schizophrenia, bipolar mania, or agitation associated with schizophrenia or bipolar mania. ABILIFY should be used with caution in patients with known cardiovascular disease (history of myocardial infarction or ischemic heart disease, heart failure or conduction abnormalities), cerebrovascular disease, or conditions which would predispose patients to hypotension (dehydration, hypovolemia, and treatment with antihypertensive medications). If parenteral benzodiazepine therapy is deemed necessary in addition to ABILIFY injection treatment, patients should be monitored for excessive sedation and for orthostatic hypotension.

**Seizures:** In short-term trials, seizures/convulsions occurred in 0.1% (1/926) of oral aripiprazole-treated patients with schizophrenia, in 0.3% (2/597) of oral aripiprazole-treated patients with bipolar mania, and in 0.2% (1/501) of aripiprazole injection-treated patients with agitation associated with schizophrenia or bipolar mania. Use cautiously in patients with a history of seizures or with conditions that lower the seizure threshold. Conditions that lower the seizure threshold may be more prevalent in a population of 65 years or older.

**Potential for Cognitive and Motor Impairment:** Despite the relatively modest increased incidence of somnolence compared to placebo, ABILIFY, like other antipsychotics, may have the potential to impair judgment, thinking, or motor skills. In short-term trials, somnolence (including sedation) was reported in 10% of patients with schizophrenia on oral ABILIFY compared to 8% of patients on placebo; 14% of patients with bipolar mania on oral ABILIFY compared to 7% of patients on placebo; and in 9% of patients with agitation associated with schizophrenia or bipolar mania on ABILIFY injection compared to 6% of patients on placebo. Patients should be cautioned about operating hazardous machinery, including automobiles, until they are reasonably certain that therapy with ABILIFY does not affect them adversely.

**Body Temperature Regulation:** Disruption of body temperature regulation has been attributed to antipsychotic agents. Use appropriate care when prescribing aripiprazole for patients who will be experiencing conditions that may contribute to an elevation in core body temperature.

**Dysphagia:** Esophageal dysmotility and aspiration have been associated with antipsychotic drug use, including ABILIFY. Aspiration pneumonia is a common cause of morbidity and mortality in patients with advanced Alzheimer's disease. ABILIFY and other antipsychotic drugs should be used cautiously in patients at risk for aspiration pneumonia.

**Suicide:** The possibility of a suicide attempt is inherent in psychotic illnesses and bipolar disorder, and close supervision of high-risk patients should accompany drug therapy. Prescriptions for ABILIFY should be written for the smallest quantity consistent with good patient management.

**Use in Patients with Concomitant Illness:** Clinical experience with ABILIFY in patients with certain concomitant systemic illnesses is limited. ABILIFY has not been evaluated or used to any appreciable extent in patients with a recent history of myocardial infarction or unstable heart disease.

In three, 10-week, placebo-controlled studies of aripiprazole in elderly patients with psychosis associated with Alzheimer's disease (n=938), the treatment-emergent adverse events that were reported at an incidence of  $\geq 3\%$  and aripiprazole incidence at least twice that for placebo were lethargy, somnolence (including sedation), incontinence (primarily, urinary incontinence), excessive salivation, and lightheadedness. ABILIFY is not approved for treatment of patients with dementia-related psychosis. If the prescriber elects to treat such patients with ABILIFY, vigilance should be exercised, particularly for the emergence of difficulty swallowing or excessive somnolence, which could predispose to accidental injury or aspiration (See **Boxed WARNING, WARNINGS and CLINICAL PHARMACOLOGY: Special Populations in Full Prescribing Information**.)

**Information for Patients:** Physicians are advised to discuss the following issues with patients for whom they prescribe ABILIFY (aripiprazole). See Full Prescribing Information for the complete information to discuss with patients taking ABILIFY.

**Interference with Cognitive and Motor Performance:** Patients should be cautioned about operating hazardous machinery, including automobiles, until they are reasonably certain that ABILIFY does not affect them adversely.

**Pregnancy:** Patients should be advised to notify their physician if they become pregnant or intend to become pregnant during therapy with ABILIFY.

**Nursing:** Patients should be advised not to breast-feed an infant if they are taking ABILIFY.

**Concomitant Medication:** Patients should be advised to inform their physicians if they are taking, or plan to take, any prescription or over-the-counter drugs, since there is a potential for interactions.

**Heat Exposure and Dehydration:** Patients should be advised regarding appropriate care in avoiding overheating and dehydration.

**Phenylketonurics:** Phenylalanine is a component of aspartame. Each ABILIFY DISCMELT orally disintegrating tablet contains the following amounts: 10 mg - 1.12 mg phenylalanine and 15 mg - 1.68 mg phenylalanine.

**Sugar Content:** Patients should be advised that each mL of ABILIFY oral solution contains 400 mg of sucrose and 200 mg of fructose.

**Drug Interactions:** Use caution when ABILIFY is taken in combination with other centrally acting drugs and alcohol. ABILIFY may enhance the effect of certain antihypertensive agents. ABILIFY is unlikely to cause clinically important drug interactions mediated by the enzymes CYP1A1, CYP1A2, CYP2A6, CYP2B6, CYP2C8, CYP2C9, CYP2C19, or CYP2E1 enzymes. *In vivo* studies using 10- to 30-mg/day doses of aripiprazole had no significant effect on metabolism by CYP2D6 (dextromethorphan), CYP2C9 (warfarin), CYP2C19 (omeprazole, warfarin), and CYP3A4 (dextromethorphan) substrates. No clinically significant effect of famotidine, valproate, or lithium was seen on the pharmacokinetics of aripiprazole.

**Inducers of CYP3A4** (eg, carbamazepine) could cause an increase in aripiprazole clearance and lower blood levels. When a CYP3A4 inducer is added to ABILIFY, the dose of ABILIFY should be doubled. Additional dose increases should be based on clinical evaluation. When the CYP3A4 inducer is withdrawn from combination therapy, the ABILIFY dose should be reduced.

**Carbamazepine:** Coadministration of carbamazepine (200 mg BID) with ABILIFY (30 mg QD) resulted in an approximate 70% decrease in  $C_{max}$  and AUC values of aripiprazole and its active metabolite, dehydro-aripiprazole.

**Inhibitors of CYP3A4** (eg, ketoconazole) or **CYP2D6** (eg, quinidine, fluoxetine, or paroxetine) can inhibit the elimination of aripiprazole and cause increased blood levels. When a strong CYP3A4 or CYP2D6 inhibitor is added to ABILIFY, the dose of ABILIFY should be reduced to one-half of the usual dose. When the CYP3A4 or CYP2D6 inhibitor is withdrawn from the combination therapy, the ABILIFY dose should then be increased.

**Ketoconazole:** Coadministration of ketoconazole (200 mg/day for 14 days) with a 15-mg single dose of ABILIFY increased the AUC of aripiprazole and its active metabolite by 63% and 77%, respectively.

**Quinidine:** Coadministration of a 10-mg single dose of ABILIFY with quinidine (166 mg/day for 13 days) increased the AUC of aripiprazole by 112% but decreased the AUC of its active metabolite, dehydro-aripiprazole, by 35%.

**Alcohol:** There was no significant difference between aripiprazole coadministered with ethanol and placebo coadministered with ethanol on performance of gross motor skills or stimulus response in healthy subjects. As with most psychoactive medications, patients should be advised to avoid alcohol while taking ABILIFY.

**Carcinogenesis, Mutagenesis, Impairment of Fertility, Carcinogenesis:** Carcinogenicity studies were conducted in ICR mice and in Sprague-Dawley (SD) and F344 rats. Aripiprazole was administered for 2 years in the diet at doses of 1, 3, 10, and 30 mg/kg/day to ICR mice and at 10, 20, 40, 60 mg/kg/day (3 to 19 times the maximum recommended human dose (MRHD) based on  $mg/m^2$ ) to SD rats and 1, 3, and 10 mg/kg/day to F344 rats (0.2 to 5 and 0.3 to 3 times the MRHD based on  $mg/m^2$ , respectively). In addition, SD rats were dosed orally for 2 years. Aripiprazole did not induce tumors in male mice or rats. In female mice, the incidences of pituitary gland adenomas and mammary gland adenocarcinomas and adenocarcinomas were increased at dietary doses of 3 to 30 mg/kg/day (0.1 to 0.9 times human exposure at MRHD based on AUC and 0.5 to 5 times the MRHD based on  $mg/m^2$ ). In female rats, the incidence of mammary gland fibroadenomas was increased at a dietary dose of 10 mg/kg/day (0.1 times human exposure at MRHD based on AUC and 3 times the MRHD based on  $mg/m^2$ ) and the incidences of adrenocortical carcinomas and combined adrenocortical adenomas/carcinomas were increased at an oral dose of 60 mg/kg/day (14 times human exposure at MRHD based on AUC and 19 times the MRHD based on  $mg/m^2$ ). These findings are considered to be prolactin-mediated. Increases in serum prolactin were observed in a 13-week dietary study in female mice at doses used in the carcinogenicity study. Serum prolactin was not increased in a 4- and 13-week dietary study in female rats. The relevance for human risk of prolactin-mediated endocrine tumors in rodents is unknown. **Mutagenesis:** Aripiprazole and a metabolite (2,3-DCPP) were clastogenic in the *in vitro* chromosomal aberration assay in Chinese hamster lung (CHL) cells, with and without metabolic activation. The metabolite, 2,3-DCPP, produced increases in numerical aberrations in the *in vitro* assay in CHL cells in the absence of metabolic activation. A positive response was obtained in the *in vivo* micronucleus assay in mice; however, the response was shown to be due to a mechanism not considered relevant to humans. **Impairment of Fertility:** Female rats were treated with oral doses of 2, 6, and 20 mg/kg/day (0.6, 2, and 6 times the MRHD on an  $mg/m^2$  basis) of aripiprazole from 2 weeks prior to mating through day 7 of gestation. Estrus cycle irregularities and increased corpora lutea were seen at all doses, but no impairment of fertility was seen. Increased pre-implantation loss was seen at 6 and 20 mg/kg, and decreased fetal weight was seen at 20 mg/kg. Male rats were treated with oral doses of 20, 40, and 60 mg/kg/day (6, 13, and 19 times the MRHD on an  $mg/m^2$  basis) of aripiprazole from 9 weeks prior to mating through mating. Disturbances in spermatogenesis were seen at 60 mg/kg, and prostate atrophy was seen at 40 and 60 mg/kg, but no impairment of fertility was seen.

**Pregnancy Category C:** There are no adequate and well-controlled studies in pregnant women. Aripiprazole should be used in pregnancy only if the potential benefit justifies the potential risk to the fetus. In animal studies, aripiprazole demonstrated developmental toxicity, including possible teratogenic effects in rats and rabbits.

**Labor and Delivery:** The effect of aripiprazole on labor and delivery in humans is unknown.

**Nursing Mothers:** Aripiprazole was excreted in milk of rats during lactation. It is not known whether aripiprazole or its metabolites are excreted in human milk. It is recommended that women receiving aripiprazole should not breast-feed.

**Pediatric Use:** Safety and effectiveness in pediatric and adolescent patients have not been established.

**Geriatric Use:** Placebo-controlled studies of oral aripiprazole in schizophrenia or bipolar mania did not include sufficient numbers of subjects aged 65 and over to determine whether they respond differently from younger subjects. There was no effect of age on the pharmacokinetics of a single 15-mg dose of aripiprazole. Aripiprazole clearance was decreased by 20% in elderly subjects ( $\geq 65$  years) compared to younger adult subjects (18 to 64 years), but there was no detectable effect of age in the population pharmacokinetic analysis in schizophrenia patients. Studies of elderly patients with psychosis associated with Alzheimer's disease have suggested that there may be a different tolerability profile in this population compared to younger patients with schizophrenia. (See also **Boxed WARNING, WARNINGS and PRECAUTIONS** in **Full Prescribing Information**.)

**ADVERSE REACTIONS**

Aripiprazole has been evaluated for safety in 8456 patients who participated in multiple-dose, clinical trials in schizophrenia, bipolar mania, and dementia of the Alzheimer's type, and who had approximately 5635 patient-years of exposure to oral aripiprazole and 749 patients with exposure to aripiprazole injection. A total of 2442 patients were treated with oral aripiprazole for at least 180 days and 1667 patients treated with oral aripiprazole had at least 1 year of exposure.

**Adverse Events Associated with Discontinuation of Treatment:** Overall, there was little difference in the incidence of discontinuation due to adverse events in placebo-controlled oral aripiprazole trials (aripiprazole vs placebo: schizophrenia, 7% vs 9%; bipolar mania, 11% vs 9%; or in placebo-controlled intramuscular aripiprazole injection trials (aripiprazole injection, 0.8%; placebo 0.5%). The types of adverse events that led to discontinuation were similar between the oral aripiprazole and placebo-treated patients.

**Commonly Observed Adverse Events:**  $\geq 5\%$  incidence and at a rate at least twice that of placebo for ABILIFY vs placebo, respectively: In 4- to 6-week, placebo-controlled, schizophrenia trials (2 to 30 mg/day), the one commonly observed adverse event associated with the use of oral aripiprazole was: akathisia (8%, 4%). In 3-week, placebo-controlled, bipolar mania trials (15 or 30 mg/day), the most common adverse events associated with oral aripiprazole were: akathisia (15%, 3%), constipation (13%, 6%), sedation (8%, 3%), tremor (7%, 3%), restlessness (6%, 3%), extrapyramidal disorder (6%, 2%). In 24-hour placebo-controlled trials of intramuscular aripiprazole injection for agitation associated with schizophrenia or bipolar mania, nausea was the one adverse event observed (9%, 3%).

**Adverse Events with an Incidence  $\geq 2\%$  in Oral Aripiprazole Trials:** The following treatment-emergent

events were reported at an incidence of  $\geq 2\%$  with oral aripiprazole (doses  $\geq 2$  mg/d), and at a greater incidence with aripiprazole than with placebo in short-term placebo-controlled trials (aripiprazole *N*=1523, placebo *N*=849), respectively, were: headache (30%, 25%), anxiety (20%, 17%), insomnia (19%, 14%), nausea (16%, 12%), vomiting (12%, 6%), dizziness (11%, 8%), constipation (11%, 7%), dyspepsia (10%, 8%), akathisia (10%, 4%), sedation (7%, 4%), fatigue (6%, 5%), extrapyramidal disorder (6%, 4%), somnolence (5%, 4%), dry mouth (5%, 4%), arthralgia (5%, 4%), tremor (5%, 3%), restlessness (5%, 3%), pharyngolaryngeal pain (4%, 3%), pain in extremity (4%, 2%), cough (3%, 2%), nasal congestion (3%, 2%), abdominal discomfort (3%, 2%), stomach discomfort (3%, 2%), pain (3%, 2%), vision blurred (3%, 1%), salivary hypersecretion (2%, 1%), peripheral edema (2%, 1%), hypertension (including blood pressure increased) (2%, 1%). The following events were reported by patients treated with oral aripiprazole with an incidence equal to or less than placebo: diarrhoea, toothache, upper abdominal pain, abdominal pain, musculoskeletal stiffness, back pain, myalgia, agitation, psychotic disorder, dysmenorrhoea (percentage based on gender total), and rash.

**Adverse Events with an Incidence  $\geq 1\%$  in Intramuscular Aripiprazole Injection Trials:** The following treatment-emergent adverse events were reported at an incidence  $\geq 1\%$  with intramuscular aripiprazole injection (doses  $\geq 5.25$  mg/day) and at an incidence greater than placebo in 24-hour, placebo-controlled trials (aripiprazole injection *N*=501, placebo *N*=220) in agitated patients with schizophrenia or bipolar mania, respectively, include: headache (2%, 7%), nausea (9%, 3%), dizziness (8%, 5%), somnolence (7%, 4%), sedation (3%, 2%), vomiting (3%, 1%), fatigue (2%, 1%), tachycardia (2%, <1%), akathisia (2%, 0%), dyspepsia (1%, <1%), dry mouth (1%, <1%), blood pressure increased (1%, <1%), musculoskeletal stiffness (1%, <1%). The following events were reported by patients treated with aripiprazole injection with an incidence equal to or less than placebo: injection site pain, injection site burning, insomnia, agitation.

**Dose-Related Adverse Events:** Dose response relationships for the incidence of treatment-emergent adverse events were evaluated from four trials in patients with schizophrenia comparing various fixed doses (2, 5, 10, 15, 20, and 30 mg/day) of oral aripiprazole to placebo. The one adverse event to have a possible dose response relationship was somnolence (including sedation) which was most prominent at the 30 mg/day dose (placebo, 7.1%; 10 mg, 8.5%; 15 mg, 8.7%; 20 mg, 7.5%; 30 mg, 12.6%).

**Extrapyramidal Symptoms:** In the short-term, placebo-controlled trials of schizophrenia, the incidence of reported EPS-related events, excluding events related to akathisia was (oral aripiprazole 13%, placebo 12%) and the incidence of akathisia-related events was (oral aripiprazole 8%, placebo 4%). In the short-term, placebo-controlled trials in bipolar mania, the incidence of reported EPS-related events, excluding events related to akathisia was (oral aripiprazole 15%, placebo 8%) and the incidence of akathisia-related events was (oral aripiprazole 15%, placebo 4%). In the placebo-controlled trials in patients with agitation associated with schizophrenia or bipolar mania, the incidence of reported EPS-related events excluding events related to akathisia was (aripiprazole injection 2%, placebo 2%) and the incidence of akathisia-related events was (aripiprazole injection 2%, placebo 0%).

**Laboratory Test Abnormalities:** A between group comparison for 3- to 6-week, placebo-controlled trials revealed no medically important differences between the aripiprazole and placebo groups in the proportions of patients experiencing potentially clinically significant changes in routine serum chemistry, hematology, or urinalysis parameters. Similarly, there were no aripiprazole/placebo differences in the incidence of discontinuations for changes in serum chemistry, hematology, or urinalysis. In a long-term (26-week), placebo-controlled trial there were no medically important differences between the aripiprazole and placebo patients in the mean change from baseline in prolactin, fasting glucose, triglyceride, HDL, LDL, and total cholesterol measurements.

**Weight Gain:** In 4- to 6-week trials in schizophrenia, there was a slight difference in mean weight gain between aripiprazole and placebo patients (+0.7 kg vs -0.05 kg, respectively), and also a difference in the proportion of patients meeting a weight gain criterion of  $\geq 7\%$  of body weight [aripiprazole (8%) compared to placebo (3%)]. In 3-week trials in mania, the mean weight gain for aripiprazole and placebo patients was 0.0 kg vs -0.2 kg, respectively. The proportion of patients meeting a weight gain criterion of  $\geq 7\%$  of body weight was aripiprazole (3%) compared to placebo (2%). In a 26-week schizophrenia trial, weight change, respectively, for ABILIFY (aripiprazole)- and placebo-treated patients was -0.5 kg and -0.5 kg for those with BMI  $<23$ , -1.3 kg and -0.6 kg for those with BMI 23 to 27, and -2.1 kg and -1.5 kg for those with BMI  $\geq 27$ . The percentage of ABILIFY- and placebo-treated patients, respectively, with  $\geq 7\%$  increase in baseline body weight was 6.8% and 3.7% for those with BMI  $<23$ , 5.1% and 4.2% for those with BMI 23 to 27, and 5.7% and 4.1% for those with BMI  $\geq 27$ . In a 52-week schizophrenia trial, weight change for ABILIFY-treated patients was 2.6 kg for those with BMI  $<23$ , 1.4 kg for those with BMI 23 to 27, and -1.2 kg for those with BMI  $\geq 27$ . The percentage of ABILIFY-treated patients with  $\geq 7\%$  increase in baseline body weight was 30% for those with BMI  $<23$ , 19% for those with BMI 23 to 27, and 8% for those with BMI  $\geq 27$ .

**ECG Changes:** Pooled analysis of placebo-controlled trials in patients with schizophrenia or bipolar mania treated with intramuscular aripiprazole injection, revealed no significant differences between aripiprazole and placebo of potentially important changes in ECG parameters. Oral aripiprazole was associated with a median increase in heart rate of 5 beats per minute compared to a 1 beat per minute increase among placebo patients.

#### **Adverse Events in Long-Term, Double-Blind, Placebo-Controlled Trials**

The adverse events reported in a 26-week, double-blind trial comparing oral ABILIFY and placebo in patients with schizophrenia or bipolar mania were generally consistent with those reported in the short-term, placebo-controlled trials, except for a higher incidence of tremor (ABILIFY 8% vs placebo 2%).

#### **Other Adverse Events Observed During the Premarketing Evaluation of Oral Aripiprazole**

The following adverse events were reported with oral aripiprazole at multiple doses  $\geq 2$  mg/day in clinical trials (8456 patients, 5365 patient-years of exposure). This list may not include events previously listed elsewhere in the labeling, those events for which a drug cause was remote, those terms which were so general as to be uninformative, and those events reported with an incidence of  $\leq 0.05\%$  and which did not have a substantial probability of being acutely life-threatening. **Frequent events** are those occurring in at least 1/100 patients; **infrequent events** are those occurring in 1/100 to 1/1000 patients; **rare events** are those occurring in fewer than 1/1000 patients. **Blood and Lymphatic System Disorders:** *Infrequent:* anaemia, lymphadenopathy, leukopenia (including agranulocytosis, neutropenia); *Rare:* leukocytosis, thrombocytopenia, idiopathic thrombocytopenic purpura, thrombocythemia. **Cardiac Disorders:** *Frequent:* tachycardia (including ventricular, supraventricular, sinus); *Infrequent:* bradycardia, palpitations, cardiac failure (including congestive and acute), myocardial infarction, cardiac arrest, atrial fibrillation, atrioventricular block (including first degree and complete), extrasystoles (including ventricular and supraventricular), angina pectoris, cyanosis, bundle branch block (including left, right), myocardial infarction; *Rare:* atrial flutter, cardiomegaly, cardiomyopathy, cardiopulmonary failure. **Ear and Labyrinth Disorders:** *Infrequent:* ear pain, vertigo, tinnitus; *Rare:* deafness. **Endocrine Disorders:** *Infrequent:* hypothyroidism; *Rare:* goitre, hyperparathyroidism, hyperthyroidism. **Eye Disorders:** *Frequent:* conjunctivitis; *Infrequent:* eye redness, eye irritation, dry eye, blepharospasm, visual disturbance, eye pain, eye discharge, blepharitis, cataract, lacrimation increased; *Rare:* eyelid function disorder, oculogyration, eyelid edema, photophobia, diplopia, eyelid ptosis, eye haemorrhage. **Gastrointestinal Disorders:** *Frequent:* loose stools; *Infrequent:* flatulence, dysphagia, gastroesophageal reflux disease, gastritis, haemorrhoids, abdominal distention, faecal incontinence, haematochezia, gingival pain, rectal haemorrhage, abdominal pain lower, oral pain, rectal itching, faecaloma, gastrointestinal haemorrhage, ulcer (including gastric, duodenal, peptic), tooth fracture, gingivitis, lip dry; *Rare:* abdominal tenderness, chapped lips, periodontitis, argyria, gastrointestinal pain, hypoaesthesia oral, inguinal hernia, swollen tongue, colitis, haematemesis, hyperchlorhydria, irritable bowel syndrome, oesophagitis, faeces hard, gingival bleeding, glossodynia, mouth ulceration, reflux oesophagitis, cheilitis, intestinal obstruction, pancreatitis, eructation, gastric ulcer haemorrhage, melana, glossitis, stomatitis. **General Disorders and Administration Site Conditions:** *Frequent:* asthenia, pyrexia, chest pain, gait disturbance; *Infrequent:* malaise, oedema, influenza-like illness, chills, general physical health deterioration, feeling jittery, mobility decreased, thirst, feeling cold, difficulty in walking, facial pain, sluggishness, condition aggravated; *Rare:* inflammation localized, swelling, energy increased, inflammation, abasia, xerosis, feeling hot, hyperthermia, hypothermia. **Hepatobiliary Disorders:** *Infrequent:* cholecystitis (including acute and chronic); *Rare:* cholelithiasis, hepatitis. **Immune System Disorders: *Infrequent:* hypersensitivity. **Infections and Infestations:** *Frequent:* respiratory tract infection (including upper and lower), pneumonia; *Infrequent:* cellulitis, dental caries, vaginitis, vaginal infection, cystitis, vaginal mycosis, eye infection, gastroenteritis, onychomycosis, vaginal candidiasis, otitis media, folliculitis, candidiasis, otitis externa, pyelonophthitis, rash pustular; *Rare:* appendicitis, septic shock. **Injury, Poisoning, and Procedural Complications:** *Frequent:* fall, skin laceration, contusion, fracture; *Infrequent:* blister, scratch, joint sprain, burn, muscle strain, periorbital haematoma, arthropod bite/sting, head injury, sunburn; *Rare:* joint dislocation, alcohol poisoning, road traffic accident, self mutilation, injury penetration, injury asphyxiation, poisoning, heat exhaustion, heat stroke. **Investigations:** *Frequent:* weight decreased, blood creatine phosphokinase increased; *Infrequent:* blood glucose increased, heart rate increased, body temperature increased, alanine aminotransferase increased, blood cholesterol increased, white blood cell count increased, haemoglobin decreased, aspartate aminotransferase increased, blood urea increased, electrocardiogram ST segment abnormal (including depression, elevation), haematocrit decreased, hepatic enzyme increased, blood bilirubin increased, blood glucose decreased, blood creatinine increased, blood alkaline phosphatase increased, blood pressure decreased, blood potassium decreased, blood urine present, electrocardiogram QT corrected interval prolonged; *Rare:* transaminases increased, blood triglycerides increased, blood uric acid increased, cardiac murmur, eosinophil count increased, neutrophil**

count increased, platelet count increased, red blood cell count decreased, white blood cell count decreased, white blood cells urine positive, bacteria urine identified, blood lactate dehydrogenase increased, blood potassium increased, neutrophil count decreased, urine output decreased, blood creatine phosphokinase MB increased, ECG signs of myocardial ischaemia, electrocardiogram T-wave inversion, heart rate decreased, tuberculin test positive, glucose urine present, glycosylated haemoglobin increased, glucose tolerance decreased, glycosylated haemoglobin decreased, muscle enzyme increased.

**Metabolism and Nutrition Disorders:** *Frequent:* decreased appetite (including diet refusal, markedly reduced dietary intake), dehydration; *Infrequent:* anorexia, increased appetite, hypercholesterolaemia, hypokalaemia, hyperglycaemia, diabetes mellitus, hypoglycaemia, hyponatraemia, diabetes mellitus non-insulin-dependent, hyperlipidaemia, obesity (including overweight), polydipsia; *Rare:* hypertriglyceridaemia, gout, hypernatraemia, weight fluctuation, diabetes mellitus inadequate control.

**Musculoskeletal and Connective Tissue Disorders:** *Frequent:* musculoskeletal pain (including neck, jaw, chest wall, bone, buttock, groin, flank, musculoskeletal chest, pubic, and sacral), muscle rigidity, muscle cramp; *Infrequent:* muscle twitching, joint swelling, muscle spasms, muscle tightness, arthritis, osteoarthritis, muscular weakness, joint range of motion decreased, sensation of heaviness; *Rare:* tendonitis, osteoporosis, trismus, arthropathy, bursitis, exostosis, night cramps, corydymia, joint contracture, localised osteoarthritis, osteopenia, rhabdomyolysis, costochondritis, rheumatoid arthritis, torticollis. **Nervous System Disorders:** *Frequent:* lethargy, dyskinesia; *Infrequent:* disturbance in attention, parkinsonism, dystonia, drooling, cogwheel rigidity, dysarthria, paraesthesia, hypoaesthesia, loss of consciousness (including depressed level of consciousness), hypersomnia, psychomotor hyperactivity, balance disorder, cerebrovascular accident, hypokinesia, tardive dyskinesia, memory impairment, amnesia, ataxia, dementia, hypotonia, burning sensation, dysgeusia, restless leg syndrome, hypertonia, Parkinson's disease, akinesia, dysphasia, transient ischaemic attack, facial palsy, hemiparesis, myoclonus, sciatica; *Rare:* bradykinesia, coordination abnormal, cognitive disorder, syncope vasovagal, carpal tunnel syndrome, hyperreflexia, intention tremor, muscle contractions involuntary, sleep apnoea syndrome, dementia Alzheimer's type, epilepsy, hyperreflexia, mastication disorder, mental impairment, nerve compression, parkinsonian gait, tongue paralysis, aphasia, choreoathetosis, formication, masked facies, neuralgia, paraesthesia oral, parkinsonian rest tremor, cerebral haemorrhage, dizziness exertional, hyperaesthesia, haemorrhage intracranial, ischaemic stroke, judgment impaired, subarachnoid haemorrhage. **Psychiatric Disorders:** *Frequent:* schizophrenia (including schizoaffective disorder), depression (including depressive symptom), hallucination (including auditory, visual, tactile, mixed, olfactory, and somatic), mood altered (including depressed, euphoric, elevated, and mood swings), paranoia, irritability, suicidal ideation, confusional state, aggression, mania, delusion (including persecutory, perception, somatic, and grandeur); *Infrequent:* tension, nervousness, nightmare, excitability, panic attack (including panic disorder, panic disorder with agoraphobia, and panic reaction), abnormal dreams, apathy, libido decreased, hostility, suicide attempt, bipolar disorder (including bipolar I), libido increased, anger, delirium, acute psychosis, disorientation, bruxism, hypomania, obsessive-compulsive disorder (including obsessive thoughts), mental status changes, crying, dysphoria, completed suicide, flat affect, impulsive behaviour; *Rare:* blunted affect, cognitive deterioration, logorrhea, psychomotor agitation, social avoidant behaviour, psychomotor retardation, psychoses, affect lability, anorgasmia, fear, homicidal ideation, tic, premature ejaculation, dysphemia, bradyphrenia, derealisation, depersonalisation.

**Renal and Urinary Disorders:** *Infrequent:* pollakiuria, dysuria, haematuria, urinary retention, renal failure (including acute and chronic), urinary hesitation, enuresis, nephrolithiasis, micturition urgency, polyuria; *Rare:* nocturia, proteinuria, glycosuria, calculus urinary, azotemia. **Reproductive System and Breast Disorders:** *Infrequent:* erectile dysfunction, vaginal discharge, amenorrhoea, vaginal haemorrhage, menstruation irregular, menorrhagia, premenstrual syndrome, testicular pain, genital pruritus female, ovarian cyst, benign prostatic hyperplasia, prostatitis; *Rare:* gynaecostoma, priapism (including spontaneous penile erection), breast pain, pelvic pain, epididymitis, galactorrhoea, uterine haemorrhage. **Respiratory, Thoracic, and Mediastinal Disorders:** *Frequent:* dyspnoea (including exertional); *Infrequent:* sinus congestion, rhinorrhoea, wheezing, epistaxis, asthma, hiccups, productive cough, chronic obstructive airways disease (including exacerbated), rhinitis allergic, pneumonia aspiration, pulmonary congestion, sinus pain, respiratory distress, dry throat, hoarseness; *Rare:* bronchopneumopathy, haemoptysis, respiratory arrest, sneezing, hypoxia, pulmonary embolism, pulmonary oedema (including acute), respiratory failure, bronchospasm, nasal dryness, paranasal sinus hypersecretion, pharyngeal erythema, rhonchi, tonsillar hypertrophy, asphyxia, Mendelson's syndrome. **Skin and Subcutaneous Tissue Disorders:** *Infrequent:* hyperhidrosis, erythema, pruritus (including generalised), dry skin, decubitus ulcer, dermatitis (including allergic, seborrhoeic, acneiform, exfoliative, bullous, neurodermatitis), ecchymosis, skin ulcer, acne, eczema, hyperkeratosis, swelling face, skin discoloration, photosensitivity reaction, skin irritation, alopecia, rash maculopapular, cold sweat, scab, face edema, dermal cyst, psoriasis, night sweats, rash erythematous; *Rare:* rash scaly, urticaria, rash maculopapular, rosacea, seborrhoea, periorbital edema, rash vesicular. **Vascular Disorders:** *Infrequent:* hypotension; *Infrequent:* hot flush (including flushing), haematoma, deep vein thrombosis, phlebitis; *Rare:* pallor, petechiae, varicose vein, circulatory collapse, haemorrhage, thrombophlebitis, shock.

**Other Adverse Events Observed During the Premarketing Evaluation of Aripiprazole Injection**  
The following adverse events were reported with aripiprazole injection at doses  $\geq 1$  mg/day in clinical trials (749 patients). This list may not include events previously listed elsewhere in the labeling, those events for which a drug cause was remote, those terms which were so general as to be uninformative, and those events reported with an incidence of  $\leq 0.05\%$  and which did not have a substantial probability of being acutely life-threatening. **Frequent events** are those occurring in at least 1/100 patients; **infrequent events** are those occurring in 1/100 to 1/1000 patients; **rare events** are those occurring in fewer than 1/1000 patients. **Ear and Labyrinth Disorders:** *Infrequent:* hyperacusis. **General Disorders and Administration Site Conditions:** *Infrequent:* injection site stinging, abnormal feeling, injection site pruritus, injection site swelling, venipuncture site bruise. **Infections and Infestations:** *Infrequent:* bacteriuria, urinary tract infection, urepsis. **Investigations:** *Infrequent:* blood pressure abnormal, heart rate irregular, electrocardiogram T-wave abnormal. **Psychiatric Disorders:** *Infrequent:* intentional self-injury. **Respiratory, Thoracic, and Mediastinal Disorders:** *Infrequent:* pharyngolaryngeal pain, nasal congestion. **Vascular Disorders:** *Infrequent:* blood pressure fluctuation.

**Postintroduction Reports:** Reported since market introduction and temporally (not necessarily causally) related to aripiprazole therapy: allergic reaction (eg, anaphylactic reaction, angioedema, laryngospasm, oropharyngeal spasm, pruritus, or urticaria), grand mal seizure, and jaundice.

#### **DRUG ABUSE AND DEPENDENCE:** Aripiprazole is not a controlled substance.

**Abuse and Dependence:** Aripiprazole has not been systematically studied in humans for its potential for abuse, tolerance, or physical dependence. While the clinical trials did not reveal any tendency for any drug-seeking behavior, it is not possible to predict on the basis of this limited experience the extent to which a CNS-active drug will be misused, diverted, and/or abused once marketed. Patients should be evaluated carefully for a history of drug abuse and closely observed for signs of ABILIFY (aripiprazole) misuse or abuse.

**OVERDOSAGE:** 76 cases of deliberate or accidental overdose with oral ABILIFY alone or in combination with other substances were reported worldwide [44 cases with known outcome, 33 recovered without sequelae and one recovered with sequelae (mydriasis and feeling abnormal)]. Additionally, 10 of these cases were in children (age 12 and younger) involving oral aripiprazole ingestions up to 195 mg with no fatalities. The largest known acute ingestion was 1080 mg of oral aripiprazole (36 times maximum recommended daily dose) in a patient who fully recovered. Common adverse events (reported in at least 5% of all overdose cases) were vomiting, somnolence, and tremor. For more information on symptoms of overdose, see Full Prescribing Information.

**Management of Overdose:** No specific information is available on the treatment of overdose with aripiprazole. An electrocardiogram should be obtained in case of overdose and, if QTc interval prolongation is present, cardiac monitoring should be instituted. Otherwise, management of overdose should concentrate on supportive therapy, maintaining an adequate airway, oxygenation and ventilation, and management of symptoms. Close medical supervision and monitoring should continue until the patient recovers. **Charcoal:** In the event of an overdose of ABILIFY, an early charcoal administration may be useful in partially preventing the absorption of aripiprazole. Administration of 50 g of activated charcoal, one hour after a single 15-mg oral dose of aripiprazole, decreased the mean AUC and  $C_{max}$  of aripiprazole by 50%. **Hemodialysis:** Although there is no information on the effect of hemodialysis in treating an overdose with aripiprazole, hemodialysis is unlikely to be useful in overdose management since aripiprazole is highly bound to plasma proteins.

Tablets manufactured by Otsuka Pharmaceutical Co., Ltd., Tokyo, 101-8535 Japan or Bristol-Myers Squibb Company, Princeton, NJ 08543 USA

Orally Disintegrating Tablets, Oral Solution and Injection manufactured by Bristol-Myers Squibb Company, Princeton, NJ 08543 USA

Distributed and marketed by Otsuka America Pharmaceutical, Inc., Rockville, MD 20850 USA

Marketed by Bristol-Myers Squibb Company, Princeton, NJ 08543 USA

US Patent Nos: 5,006,528; 6,977,257; and 7,115,587

 Bristol-Myers Squibb Company

 Otsuka America Pharmaceutical, Inc.

Princeton, NJ 08543 U.S.A. Rockville, MD 20850 U.S.A.

D6-B0001C-10-06

Based on FPI Revised October 2006

© 2007, Otsuka Pharmaceutical Co., Ltd., Tokyo, 101-8535 Japan

# APA 2007 ANNUAL MEETING IN SAN DIEGO

## INSIGHTS FROM STAR\*D: ARE OUR PATIENTS' NEEDS BEING MET?

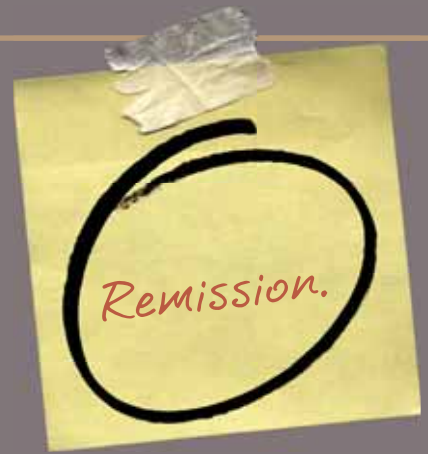

### LEARNING OBJECTIVES

At the conclusion of this symposium, the participant should be able to:

1. Identify the unmet needs of patients who are unlikely to achieve remission with any one treatment.
2. Evaluate strategies for partial or non-responders that include switching, augmentation, and combination strategies.
3. Design a treatment plan that utilizes non-pharmacologic and pharmacologic strategies to achieve remission.

### PROGRAM AGENDA

5:30–6:00 PM

**Dinner**

6:00–6:10 PM

**Introduction**

**Maurizio Fava, MD (Chair)**

Massachusetts General Hospital  
Harvard Medical School

6:10–6:35 PM

**Do Antidepressants Work in the Real World and for Whom?**

**Roy H. Perlis, MD**

Harvard Medical School  
Massachusetts General Hospital

6:35–7:00 PM

**Polypharmacy to Increase the Chances of Remission**

**Maurizio Fava, MD**

Massachusetts General Hospital  
Harvard Medical School

7:00–7:25 PM

**Switching Antidepressants: The STAR\*D Experience**

**Michael E. Thase, MD**

University of Pennsylvania

7:25–7:50 PM

**Augmentation and Combination Strategies in Treatment-Resistant Depression**

**Alan F. Schatzberg, MD**

Stanford University School of Medicine

7:50–8:15 PM

**The Role of Psychotherapy as Adjunctive Treatment in Depression**

**Amy Farabaugh, PhD**

Harvard Medical School  
Massachusetts General Hospital

8:15–9:00 PM

**Panel Discussion/Q&A**

### ACCREDITATION STATEMENT

The American Psychiatric Association (APA) is accredited by the Accreditation Council for Continuing Medical Education to provide continuing medical education for physicians.

### CREDIT DESIGNATION

The APA designates this educational activity for a maximum of 3 *AMA PRA Category 1 Credits*<sup>™</sup>. Physicians should only claim credit commensurate with the extent of their participation in the activity.

### REGISTRATION

Attendees must be registered for the APA Annual Meeting to attend this symposium. Seating is limited and will be based on first-come, first-served. For more information about the meeting, please visit the APA website at [www.psych.org](http://www.psych.org) or contact the APA toll-free at 1-888-357-7924 (within the U.S. or Canada) or 703-907-7300.

Supported by an educational grant from

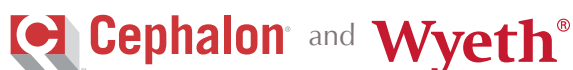

**Saturday, May 19, 2007**

**6:00–9:00 PM**

Marriott San Diego, Marriott Halls 1-4,  
North Tower, Lobby Level

Sponsored by the  
American Psychiatric  
Association

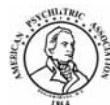

Saturday, May 19, 2007 || 6:00–9:00 pm  
Manchester Grand Hyatt, Manchester Ballroom, Second Level

SAN DIEGO, CA

# THE PREVAILING PREDOMINANT POLE OF BIPOLAR DEPRESSION

## PROGRAM AGENDA

- 5:30–6:00 pm **Dinner**
- 6:00–6:10 pm **Introduction**  
Mark A. Frye, MD (Session Chair)  
*Mayo Clinic Department of Psychiatry and Psychology*
- 6:10–6:35 pm **Neurobiology of Bipolar Depression: Implications for Treatment**  
Robert M. Post, MD  
*Penn State University College of Medicine  
Biological Collaborative Network*
- 6:35–7:00 pm **New Treatment Options for Bipolar Depression**  
Marcia L. Verduin, MD  
*Medical University of South Carolina*
- 7:00–7:25 pm **Clinical Correlates Associated with Treatment-Emergent Mania**  
Mark A. Frye, MD  
*Mayo Clinic Department of Psychiatry and Psychology*
- 7:25–7:50 pm **The Clinical Interface Between Obesity and Bipolar Depression**  
Susan L. McElroy, MD  
*University of Cincinnati*
- 7:50–8:15 pm **Clinical Challenges of Diagnosing and Treating Adolescents with Bipolar Depression**  
Kiki Chang, MD  
*Stanford University School of Medicine*
- 8:15–9:00 pm **Panel Discussion/Q&A**

## LEARNING OBJECTIVES

At the conclusion of this symposium, the participant should be able to:

1. Describe the neurobiology of bipolar depression.
2. Discuss current evidence-based medicine for the treatment of bipolar depression.
3. Realize the impact of obesity and bipolar depression, and the challenges of diagnosing and treating bipolar depression in adolescence.
4. Integrate these data into clinical practice.

## CREDIT DESIGNATION

The APA designates this educational activity for a maximum of 3 *AMA PRA Category 1 Credits™*. Physicians should only claim credit commensurate with the extent of their participation in the activity.

## ACCREDITATION STATEMENT

The American Psychiatric Association (APA) is accredited by the Accreditation Council for Continuing Medical Education to provide continuing medical education for physicians.

## REGISTRATION

Attendees must be registered for the APA Annual Meeting to attend this symposium. Seating is limited and will be based on first-come, first-served. For more information about the meeting, please visit the APA website at [www.psych.org](http://www.psych.org) or contact the APA toll-free at 1-888-357-7924 (within the U.S. or Canada) or 703-907-7300.

Supported by an  
educational grant from

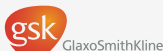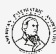

Sponsored by the American  
Psychiatric Association

PRESENTED  
AT THE  
APA 2007  
ANNUAL  
MEETING

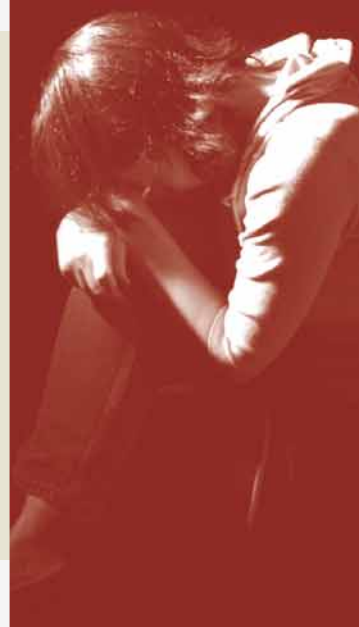



Now.

*Lilly*

# Now.

Because it's happening again.

The voices are back and they're  
telling me things that aren't right.

People are staring at me  
like they can read my thoughts.

I want to stay where I am.  
Living on my own.  
But this is bad.

If it doesn't stop, I'll end  
up back at the group home  
or in the hospital.  
I've worked too hard to get here.

I want to keep fighting,  
I just need help. Now.

**ZYPREXA**  
Olanzapine

For resources to help you help your patients with  
schizophrenia, visit [www.ToolsForTheFight.com](http://www.ToolsForTheFight.com)

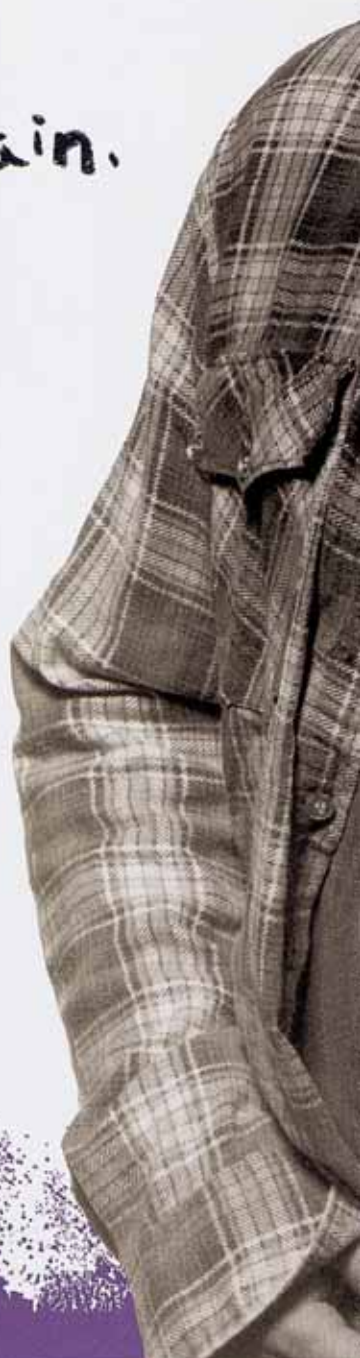

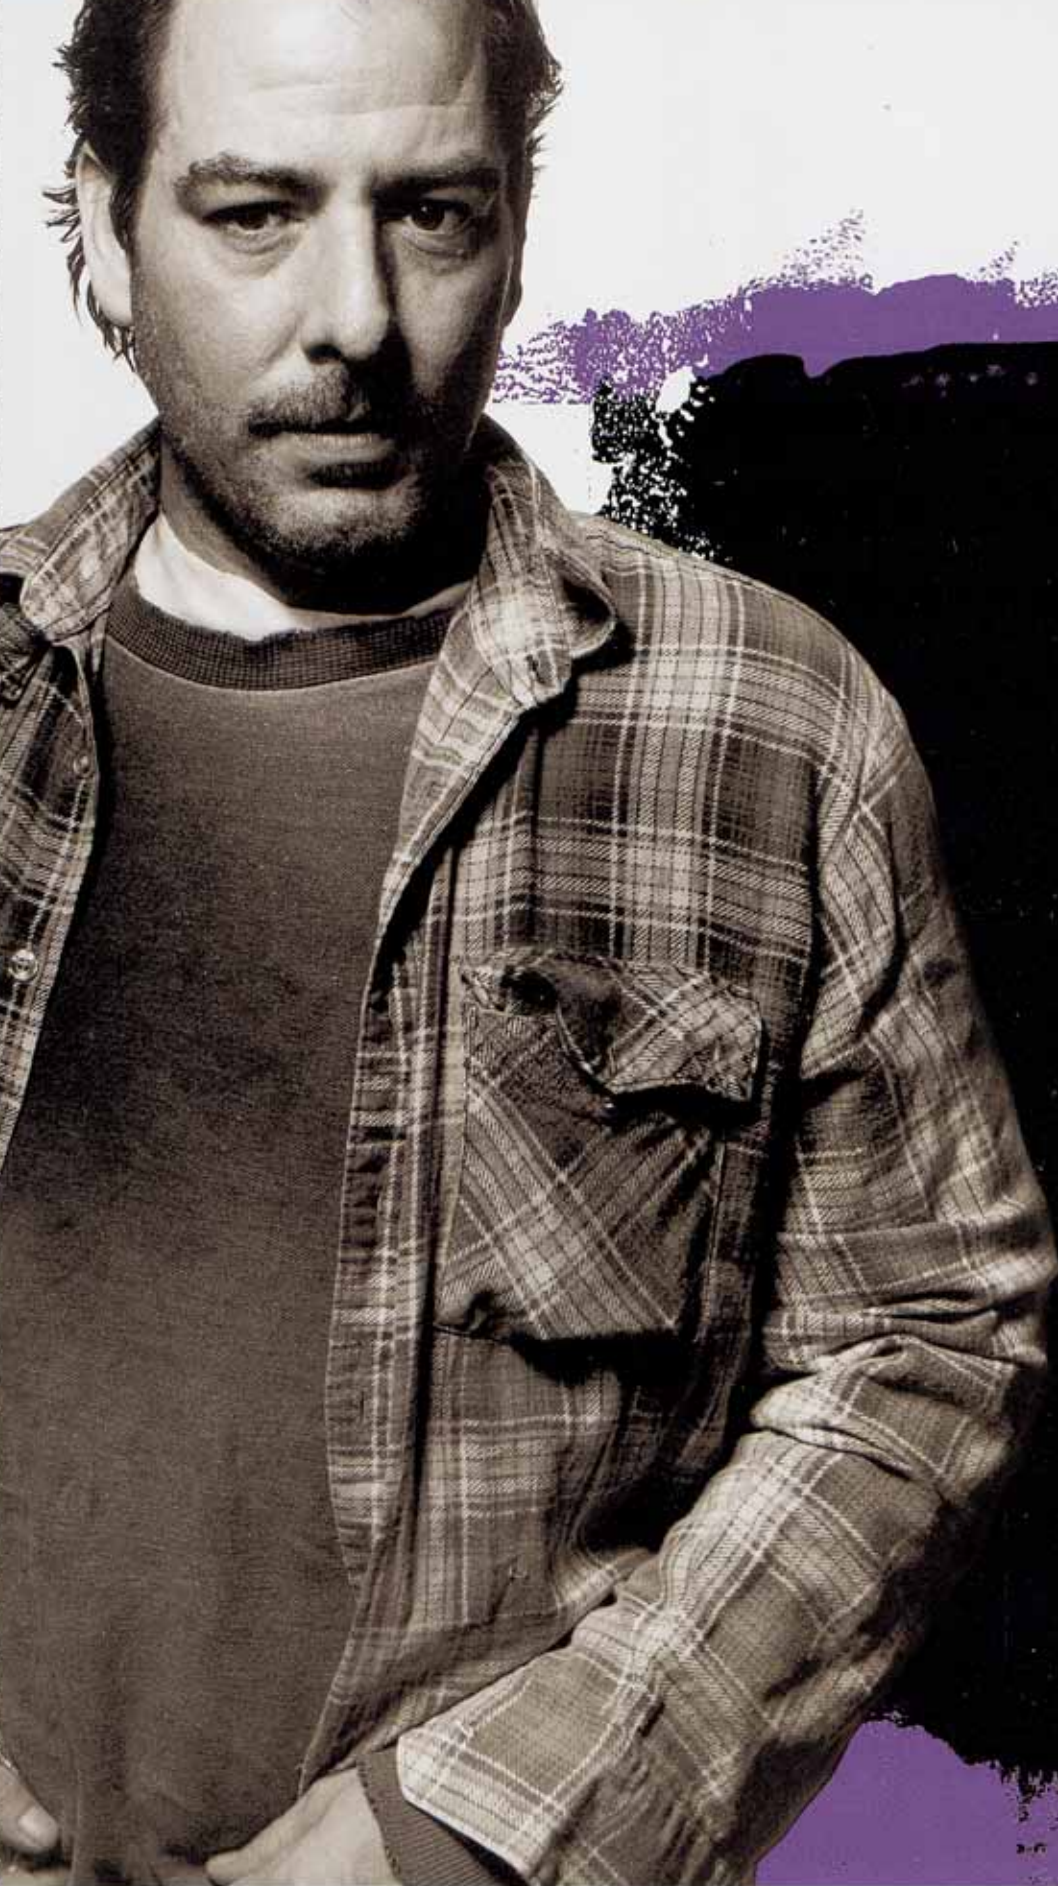

The labeling for ZYPREXA includes a boxed warning:

- Elderly patients with dementia-related psychosis treated with atypical antipsychotic drugs are at an increased risk of death compared to placebo.
- ZYPREXA is not approved for the treatment of elderly patients with dementia-related psychosis.

ZYPREXA is approved for the treatment of schizophrenia, acute bipolar mania, and for maintenance treatment in bipolar disorder.

For Important Safety Information, including boxed warning, see adjacent page and accompanying Brief Summary of Prescribing Information.

*Lilly*

## Important Safety Information for ZYPREXA® (Olanzapine)

### Increased Mortality in Elderly Patients with Dementia-Related Psychosis

Elderly patients with dementia-related psychosis treated with atypical antipsychotic drugs are at an increased risk of death compared to placebo. Analyses of seventeen placebo-controlled trials (modal duration of 10 weeks) in these patients revealed a risk of death in the drug-treated patients of between 1.6 to 1.7 times that seen in placebo-treated patients. Over the course of a typical 10-week controlled trial, the rate of death in drug-treated patients was about 4.5%, compared to a rate of about 2.6% in the placebo group. Although the causes of death were varied, most of the deaths appeared to be either cardiovascular (eg, heart failure, sudden death) or infectious (eg, pneumonia) in nature. ZYPREXA is not approved for the treatment of elderly patients with dementia-related psychosis.

**Cerebrovascular adverse events (CVAE), including stroke, in elderly patients with dementia**—Cerebrovascular adverse events (eg, stroke, transient ischemic attack), including fatalities, were reported in patients in trials of ZYPREXA in elderly patients with dementia-related psychosis. In placebo-controlled trials, there was a significantly higher incidence of CVAE in patients treated with ZYPREXA compared to patients treated with placebo. ZYPREXA is not approved for the treatment of patients with dementia-related psychosis.

**Hyperglycemia and diabetes mellitus**—Hyperglycemia, in some cases associated with ketoacidosis, coma, or death, has been reported in patients treated with atypical antipsychotics including ZYPREXA. All patients taking atypicals should be monitored for symptoms of hyperglycemia. Persons with diabetes who are started on atypicals should be monitored regularly for worsening of glucose control; those with risk factors for diabetes should undergo baseline and periodic fasting blood glucose testing. Patients who develop symptoms of hyperglycemia during treatment should undergo fasting blood glucose testing.

**Neuroleptic malignant syndrome (NMS)**—As with all antipsychotic medications, a rare and potentially fatal condition known as NMS has been reported with olanzapine. If signs and symptoms appear, immediate discontinuation is recommended. Clinical manifestations of NMS are hyperpyrexia, muscle rigidity, altered mental status and evidence of autonomic instability (irregular pulse or blood pressure, tachycardia, diaphoresis and cardiac dysrhythmia). Additional signs may include elevated creatinine phosphokinase, myoglobinuria (rhabdomyolysis), and acute renal failure.

**Tardive dyskinesia (TD)**—As with all antipsychotic medications, prescribing should be consistent with the need to minimize the risk of TD. The risk of developing TD and the likelihood that it will become irreversible are believed to increase as the duration of treatment and the total cumulative dose of antipsychotic increase. The syndrome may remit, partially or completely, if antipsychotic treatment is withdrawn.

**Medication dispensing and prescribing errors** have occurred between ZYPREXA® (olanzapine) and Zyrtec® (cetirizine HCl). These errors could result in unnecessary adverse events or potential relapse in patients suffering from schizophrenia or bipolar disorder. To reduce the potential for dispensing errors, please write ZYPREXA clearly.

**The most common treatment-emergent adverse event** associated with ZYPREXA (vs placebo) in 6-week acute-phase schizophrenia trials was somnolence (26% vs 15%). Other common events were dizziness (11% vs 4%), weight gain (6% vs 1%), personality disorder (COSTART term for nonaggressive objectionable behavior; 8% vs 4%), constipation (9% vs 3%), akathisia (5% vs 1%), and postural hypotension (5% vs 2%).

**The most common treatment-emergent adverse event** associated with ZYPREXA (vs placebo) in 3- and 4-week bipolar mania trials was somnolence (35% vs 13%). Other common events were dry mouth (22% vs 7%), dizziness (18% vs 6%), asthenia (15% vs 6%), constipation (11% vs 5%), dyspepsia (11% vs 5%), increased appetite (6% vs 3%), and tremor (6% vs 3%).

**For complete safety profile, see the full Prescribing Information.**

ZYPREXA is a registered trademark of Eli Lilly and Company. Zyrtec is a registered trademark of UCB, SA.

# ZYPREXA® (Olanzapine Tablets) ZYPREXA® ZYDIS® (Olanzapine Orally Disintegrating Tablets) ZYPREXA® IntraMuscular (Olanzapine for Injection) Brief Summary: Please consult package insert for complete prescribing information.

## WARNING

**Increased Mortality in Elderly Patients with Dementia-Related Psychosis**—Elderly patients with dementia-related psychosis treated with atypical antipsychotic drugs are at an increased risk of death compared to placebo. Analyses of seventeen placebo-controlled trials (modal duration of 10 weeks) in these patients revealed a risk of death in the drug-treated patients of between 1.6 to 1.7 times that seen in placebo-treated patients. Over the course of a typical 10-week controlled trial, the rate of death in drug-treated patients was about 4.5%, compared to a rate of about 2.6% in the placebo group. Although the causes of death were varied, most of the deaths appeared to be either cardiovascular (eg, heart failure, sudden death) or infectious (eg, pneumonia) in nature. ZYPREXA is not approved for the treatment of patients with dementia-related psychosis.

**INDICATIONS AND USAGE:** ZYPREXA and ZYPREXA Zydis are indicated for short- and long-term treatment of schizophrenia, for acute manic and mixed episodes of bipolar I disorder, and for maintenance treatment in bipolar disorder. The use of ZYPREXA for extended periods should be periodically re-evaluated as to the long-term usefulness of the drug for the individual patient. ZYPREXA IntraMuscular is indicated for treatment of agitation associated with schizophrenia and bipolar I mania.

**CONTRAINDICATIONS:** Known hypersensitivity to olanzapine.

**WARNINGS: Increased Mortality in Elderly Patients with Dementia-Related Psychosis**—Elderly patients with dementia-related psychosis treated with atypical antipsychotic drugs are at an increased risk of death compared to placebo. ZYPREXA is not approved for the treatment of patients with dementia-related psychosis (*see* **BOX WARNING**).

In placebo-controlled clinical trials of elderly patients with dementia-related psychosis, the incidence of death in olanzapine-treated patients (3.5%) was significantly greater than placebo-treated patients (1.5%).

**Cerebrovascular Adverse Events, Including Stroke, in Elderly Patients with Dementia**—Cerebrovascular adverse events (eg, stroke, transient ischemic attack), including fatalities, were reported in patients in trials of olanzapine in elderly patients with dementia-related psychosis. In placebo-controlled trials, there was a significantly higher incidence of cerebrovascular adverse events in patients treated with olanzapine compared to patients treated with placebo. Olanzapine is not approved for the treatment of patients with dementia-related psychosis.

**Hyperglycemia and Diabetes Mellitus**—Hyperglycemia, in some cases associated with ketoacidosis, coma, or death, has been reported in patients treated with atypical antipsychotics including olanzapine. Assessment of the relationship between atypical antipsychotic use and glucose abnormalities is complicated by the possibility of an increased background risk of diabetes in patients with schizophrenia and the increasing incidence of diabetes mellitus in the general population. Patients diagnosed with diabetes who are started on atypical antipsychotics should be monitored regularly for worsening of glucose control. Patients with risk factors for diabetes who are starting treatment with atypicals should have fasting blood glucose (FBG) testing at baseline and periodically during treatment. Any patient treated with atypicals should be monitored for symptoms of hyperglycemia. Patients who develop symptoms of hyperglycemia during treatment with atypicals should undergo FBG testing.

**Neuroleptic Malignant Syndrome (NMS)**—Potentially fatal NMS has been reported in association with administration of antipsychotic drugs, including olanzapine. See complete prescribing information for information on management of NMS. Patients requiring antipsychotic drug treatment after recovery from NMS should be carefully monitored since recurrences have been reported.

**Tardive Dyskinesia (TD)**—Potentially irreversible TD may develop in patients treated with antipsychotic drugs. Although the prevalence of TD appears to be highest among the elderly, especially elderly women, it is impossible to predict which patients are more likely to develop the syndrome. If signs and symptoms of TD appear, consider drug discontinuation.

**PRECAUTIONS: Hemodynamic Effects**—Olanzapine may induce orthostatic hypotension associated with dizziness, tachycardia; and in some patients, syncope. Hypotension, bradycardia with/without hypotension, tachycardia, and syncope were also reported during the clinical trials with intramuscular olanzapine for injection. Incidence of syncope was 0.6%, 15/2500 with oral olanzapine in phase 2-3 trials and 0.3%, 2/722 with intramuscular olanzapine for injection in clinical trials. Three normal volunteers in phase 1 studies with intramuscular olanzapine experienced hypotension, bradycardia, and sinus pauses of up to 6 seconds that spontaneously resolved (in 2 cases the events occurred on intramuscular olanzapine, and in 1 case, on oral olanzapine). The risk for this sequence of events may be greater in nonpsychiatric patients compared to psychiatric patients who are possibly more adapted to certain effects of psychotropic drugs. Patients should remain recumbent if drowsy or dizzy after injection with intramuscular olanzapine for injection until examination has indicated they are not experiencing postural hypotension, bradycardia, and/or hypoventilation. Olanzapine should be used with particular caution in patients with known cardiovascular disease (history of myocardial infarction or ischemia, heart failure, or conduction abnormalities), cerebrovascular disease, and conditions which would predispose patients to hypotension (dehydration, hypovolemia, and treatment with antihypertensive medications) where the occurrence of syncope, or hypotension and/or bradycardia might put them at increased medical risk. Caution is necessary in patients receiving treatment with other drugs having effects that can induce hypotension, bradycardia, respiratory or CNS depression (*see* Drug Interactions). Concomitant administration of intramuscular olanzapine and parenteral benzodiazepines has not been studied and is not recommended. If such combination treatment is considered, careful evaluation of clinical status for excessive sedation and cardiorespiratory depression is recommended.

**Seizures**—During premarketing testing, seizures occurred in 0.9% (22/2500) of olanzapine-treated patients, regardless of causality. Use cautiously in patients with a history of seizures or with conditions that potentially lower the seizure threshold.

**Hyperprolactinemia**—Like other drugs that antagonize dopamine D2 receptors, olanzapine elevates prolactin levels; a modest elevation persists during chronic administration. Tissue culture experiments indicate that approximately one third of human breast cancers are prolactin dependent in vitro. However, neither clinical nor epidemiologic studies have shown an association between chronic administration of this class of drugs and tumorigenesis in humans; the available evidence is inconclusive.

**Transaminase Elevations**—In placebo-controlled studies, clinically significant ALT (SGPT) elevations ( $\geq 3$  times the upper limit of normal) were observed in 2% (6/243) of patients exposed to olanzapine compared to no (0/115) placebo patients. None of these patients experienced jaundice. Among about 2400 patients with baseline SGPT  $\leq 90$  IU/L, 2% (50/2381) had asymptomatic SGPT elevations to  $>200$  IU/L. Most were transient changes that tended to normalize while olanzapine treatment was continued. Among 2500 patients in oral olanzapine trials, about 1% (23/2500) discontinued treatment due to transaminase increases. Rare postmarketing reports of hepatitis have been received. Very rare cases of cholestatic or mixed liver injury have also been reported in the postmarketing period. Exercise caution in patients who have signs and symptoms of hepatic impairment; preexisting conditions associated with limited hepatic functional reserve; or concomitant treatment with potentially hepatotoxic drugs (*see* Laboratory Tests, below).

**Potential for Cognitive and Motor Impairment**—Somnolence was a commonly reported, dose-related adverse event in premarketing trials (olanzapine 26% vs placebo 15%). Somnolence led to discontinuation in 0.4% (9/2500) of patients in the oral premarketing database.

**Body Temperature Regulation**—Use appropriate care when prescribing olanzapine for patients who will be experiencing conditions that may contribute to an elevation in core body temperature.

**Dysphagia**—Esophageal dysmotility and aspiration have been associated with antipsychotic drug use. Aspiration pneumonia is a common cause of morbidity and mortality in patients with advanced Alzheimer's disease. Olanzapine and other antipsychotic drugs should be used cautiously in patients at risk for aspiration pneumonia.

**Suicide**—The possibility of a suicide attempt is inherent in schizophrenia and in bipolar disorder, and close supervision of high-risk patients should accompany drug therapy. Prescriptions for olanzapine should be written for the smallest quantity of tablets consistent with good patient management.

**Use in Patients with Concomitant Illnesses**—Olanzapine should be used with caution in patients with clinically significant prostatic hypertrophy, narrow angle glaucoma, or a history of paralytic ileus.

In 5 placebo-controlled studies in elderly patients with dementia-related psychosis (n=1184), these treatment-emergent adverse events were reported with olanzapine at an incidence of  $\geq 2\%$  and significantly greater than with placebo: falls, somnolence, peripheral edema, abnormal gait, urinary incontinence, lethargy, increased weight, asthenia, pyrexia, pneumonia, dry mouth, visual hallucinations. Discontinuation due to adverse events was significantly greater with olanzapine than placebo (13% vs 7%). Elderly patients with dementia-related psychosis treated with olanzapine are at an increased risk of death compared to placebo. Olanzapine is not approved for treatment of patients with dementia-related psychosis. If the prescriber elects to treat this patient population, vigilance should be exercised (*see* **BOX WARNING** and **WARNINGS**).

Because of the risk of orthostatic hypotension with olanzapine, use caution in cardiac patients (*see* Hemodynamic Effects).

**Information for Patients**—See full prescribing information for information to discuss with patients taking olanzapine.

**Laboratory Tests**—Periodic assessment of transaminases is recommended in patients with significant hepatic disease.

**Drug Interactions**—Use caution when olanzapine is taken in combination with other centrally acting drugs and alcohol. Olanzapine may enhance the effects of certain antihypertensive agents. Olanzapine may antagonize the effects of levodopa and dopamine agonists. Agents that induce CYP1A2 or glucuronyl transferase enzymes (eg, omeprazole, rifampin) may cause an increase in olanzapine clearance. Inhibitors of CYP1A2 could potentially inhibit olanzapine clearance. Although olanzapine is metabolized by multiple enzyme systems, induction or inhibition of a single enzyme may appreciably alter olanzapine clearance. A dosage adjustment may need to be considered with specific drugs.

Activated charcoal (1 g) reduced the Cmax and AUC of oral olanzapine by about 60%. Single doses of cimetidine (800 mg) or aluminum- and magnesium-containing antacids did not affect the oral bioavailability of olanzapine. Carbamazepine (200 mg bid) causes an approximately 50% increase in the clearance of olanzapine. Higher daily doses of carbamazepine may cause an even greater increase in olanzapine clearance. Neither ethanol (45 mg/70 kg single dose) nor warfarin (20 mg single dose) had an effect on olanzapine pharmacokinetics. Fluoxetine at 60 mg (single or multiple doses) causes a small increase in the Cmax of olanzapine and a small decrease in olanzapine clearance; however, the impact of this factor is small in comparison to the overall variability between individuals, and dose modification is not routinely recommended. Fluvoxamine decreases the clearance of olanzapine; lower doses of olanzapine should be considered in patients receiving fluvoxamine concomitantly. In vitro data suggest that a clinically significant pharmacokinetic interaction between olanzapine and valproate is unlikely.

Olanzapine is unlikely to cause clinically important drug interactions mediated by the enzymes CYP1A2, CYP2C9, CYP2C19, CYP2D6, and CYP3A. Single doses of olanzapine did not affect the pharmacokinetics of imipramine/desipramine or warfarin. Multiple doses of olanzapine did not influence the kinetics of diazepam/N-desmethyldiazepam, lithium, ethanol, or biperiden. However, coadministration of either diazepam or ethanol potentiated the orthostatic hypotension observed with olanzapine. Multiple doses of olanzapine did not affect the pharmacokinetics of theophylline or its metabolites. Co-administration of intramuscular lorazepam and intramuscular olanzapine for injection added to the somnolence observed with either drug alone (*see* Hemodynamic Effects).

**Carcinogenesis, Mutagenesis, Impairment of Fertility**—The incidence of liver hemangiomas and hemangiosarcomas in female mice was significantly increased in one carcinogenicity study at 2 times the maximum human daily oral dose (MHDOD) but not in another study at 2-5 times the MHDOD (mg/m<sup>2</sup> basis). In this study there was a high incidence of early mortalities in males in the 30/20 mg/kg/d group. The incidence of mammary gland adenomas and adenocarcinomas was significantly increased in female mice and rats given olanzapine at 0.5 and 2 times the MHDOD respectively (mg/m<sup>2</sup> basis). In other studies, serum prolactin measurements of olanzapine showed elevations up to 4-fold in rats at the same doses used in the carcinogenicity studies. The relevance for human risk of the finding of prolactin mediated endocrine tumors in rodents is unknown. No evidence of mutagenic potential for olanzapine has been found.

In rats, fertility (females) and mating performance (males and females) were affected at doses 1.5-11 times the MHDOD (mg/m<sup>2</sup> basis). Diestrus was prolonged and estrous delayed at 0.6 times the MHDOD (mg/m<sup>2</sup> basis); therefore, olanzapine may produce a delay in ovulation.

**Pregnancy Category C**—There are no adequate and well-controlled studies in pregnant women. Olanzapine should be used in pregnancy only if the potential benefit justifies the potential risk to the fetus.

**Labor and Delivery, Nursing Mothers**—Parturition in rats was not affected by olanzapine; its effect on labor and delivery in humans is unknown. In a study in lactating, healthy women, olanzapine was excreted in breast milk. Mean infant dose at steady state was estimated to be 1.8% of the maternal dose. It is recommended that women receiving olanzapine should not breast-feed.

**Use in Pediatric and Geriatric Patients**—Safety and effectiveness in pediatric patients have not been established. In premarketing clinical trials in patients with schizophrenia, there was no indication of any different tolerability of olanzapine in the elderly compared to younger patients. Studies in elderly patients with dementia-related psychosis have suggested there may be a different tolerability profile in these patients. Elderly patients with dementia-related psychosis treated with olanzapine are at an increased risk of death compared to placebo. Olanzapine is not approved for treatment of patients with dementia-related psychosis. If the prescriber elects to treat these patients, vigilance should be exercised. Consider a lower starting dose for any geriatric patient in the presence of factors that might decrease pharmacokinetic clearance or increase the pharmacodynamic response to olanzapine (*see* **BOX WARNING**, **WARNINGS**, and **PRECAUTIONS**).

**ADVERSE REACTIONS:** The following findings are based on a clinical trial database consisting of 8661 patients with approximately 4165 patient-years of exposure to oral olanzapine and 722 patients with exposure to intramuscular olanzapine for injection, including patients with schizophrenia, bipolar mania, or Alzheimer's disease (oral olanzapine trials) and patients with agitation associated with schizophrenia, bipolar I disorder (manic or mixed episodes) or dementia (intramuscular olanzapine for injection trials). See the full prescribing information for details on these trials. Certain portions of the discussion below relating to dose-dependent adverse events, vital sign changes, weight gain, laboratory changes, and ECG changes are derived from studies in patients with schizophrenia and have not been duplicated for bipolar mania or agitation; however, this information is also generally applicable to bipolar mania and agitation.

**Associated with Discontinuation**—Overall there was no difference in discontinuations due to adverse events in placebo-controlled oral olanzapine trials (olanzapine vs placebo: schizophrenia, 5% vs 6%; bipolar mania monotherapy, 2% vs 2%; bipolar mania cotherapy, 11% [olanzapine plus lithium or valproate] vs 2% [lithium or valproate alone]); or in placebo-controlled intramuscular olanzapine for injection trials (olanzapine for injection, 0.4%, placebo 0%). Discontinuations in oral schizophrenia trials due to increases in SGPT were considered to be drug related (olanzapine 2% vs placebo 0%; *see* **PRECAUTIONS**).

**Commonly Observed Adverse Events**—In 6-week, placebo-controlled, premarketing schizophrenia trials, the most common treatment-emergent adverse events associated with oral olanzapine (incidence  $\geq 5\%$  and olanzapine incidence at least twice that for placebo) were: postural hypotension, constipation, weight gain, dizziness, personality disorder (COSTART term for nonaggressive objectionable behavior), and akathisia. In 3- and 4-week placebo-controlled bipolar mania monotherapy trials, the most common treatment-emergent adverse events associated with oral olanzapine were: asthenia, dry mouth, constipation, dyspepsia, increased appetite, somnolence, dizziness, and tremor. In short-term bipolar mania combination therapy trials, the most common treatment-emergent adverse events observed with olanzapine plus lithium or valproate were dry mouth, weight gain, increased appetite, dizziness, back pain, constipation, speech disorder, increased salivation, amnesia, and paresthesia. In 24-hour placebo-controlled trials of intramuscular olanzapine for injection for agitation associated with schizophrenia or bipolar mania, somnolence was the one adverse event observed at an incidence of  $\geq 5\%$  and at least twice that for placebo (olanzapine for injection 6%, placebo 3%).

**Adverse Events with an Incidence  $\geq 2\%$  in Oral Monotherapy Trials**—The following treatment-emergent events were reported at an incidence of  $\geq 2\%$  with oral olanzapine (doses  $\geq 2.5$  mg/d), and at a greater incidence with olanzapine than with placebo in short-term placebo-controlled trials (olanzapine N=532, placebo N=294):

**Body as a Whole**—accidental injury, asthenia, fever, back pain, chest pain; **Cardiovascular**—postural hypotension, tachycardia, hypertension; **Digestive**—dry mouth, constipation, dyspepsia, vomiting, increased appetite; **Hemic and Lymphatic**—ecchymosis; **Metabolic and Nutritional**—weight gain, peripheral edema; **Musculoskeletal**—extremity pain (other than joint), joint pain; **Nervous System**—somnolence, insomnia, dizziness, abnormal gait, tremor, akathisia, hypertonia, articulation impairment; **Respiratory**—rhinitis, cough increased; **Special Senses**—amblyopia; **Urogenital**—urinary incontinence, urinary tract infection.

**Adverse Events with an Incidence  $\geq 1\%$  in Oral Combination Therapy Trials**—The following treatment-emergent events were reported at an incidence of  $\geq 1\%$  with oral olanzapine (doses  $\geq 2.5$  mg/d) plus lithium or valproate (N=229), and at a greater incidence than with placebo plus lithium or valproate (N=115) in short-term placebo-controlled trials: **Body as a Whole**—asthenia, back pain, accidental injury, chest pain; **Cardiovascular**—hypertension; **Digestive**—dry mouth, increased appetite, thirst, constipation, increased salivation; **Metabolic and Nutritional**—weight gain, peripheral edema, edema; **Nervous System**—somnolence, tremor, depression, dizziness, speech disorder, amnesia, paresthesia, apathy, confusion, euphoria, incoordination; **Respiratory**—pharyngitis, dyspnea; **Skin and Appendages**—sweating, acne, dry skin; **Special Senses**—amblyopia, abnormal vision; **Urogenital**—dysmenorrhea, vaginitis.

**Adverse Events with an Incidence  $\geq 1\%$  in Intramuscular Trials**—The following treatment-emergent adverse events were reported at an incidence of  $\geq 1\%$  with intramuscular olanzapine for injection (2.5-10 mg/injection) and at incidence greater than placebo in short-term, placebo-controlled trials in agitated patients with schizophrenia or bipolar mania: **Body as a Whole**—asthenia; **Cardiovascular**—hypotension, postural hypotension; **Nervous System**—somnolence, dizziness, tremor.

**Dose Dependency of Adverse Events in Short-Term, Placebo-Controlled Trials—Extrapyramidal Symptoms:** In an acute-phase controlled clinical trial in schizophrenia, there was no significant difference in ratings scales incidence between any dose of oral olanzapine (5±2.5, 10±2.5, or 15±2.5 mg/d) and placebo for parkinsonism (Simpson-Angus Scale total score  $>3$ ) or akathisia (Barnes Akathisia global score  $\geq 2$ ). In the same trial, only akathisia events (spontaneously reported COSTART terms akathisia and hyperkinesia) showed a statistically significantly greater adverse events incidence with the 2 higher doses of olanzapine than with placebo. The incidence of patients reporting any extrapyramidal event was significantly greater than placebo only with the

ZYPREXA® (Olanzapine Tablets)  
ZYPREXA® ZYDIS® (Olanzapine Orally Disintegrating Tablets)  
ZYPREXA® IntraMuscular (Olanzapine for Injection) PV 5197 AMP

ZYPREXA® (Olanzapine Tablets)  
ZYPREXA® ZYDIS® (Olanzapine Orally Disintegrating Tablets)  
ZYPREXA® IntraMuscular (Olanzapine for Injection) PV 5197 AMP

highest dose of oral olanzapine (15±2.5 mg/d). In controlled clinical trials of intramuscular olanzapine for injection, there were no statistically significant differences from placebo in occurrence of any treatment-emergent extrapyramidal symptoms, assessed by either rating scales incidence or spontaneously reported adverse events.

**Other Adverse Events:** Dose-relatedness of adverse events was assessed using data from this same clinical trial involving 3 fixed oral dosage ranges (5±2.5, 10±2.5, or 15±2.5 mg/d) compared with placebo. The following treatment-emergent events showed a statistically significant trend: asthenia, dry mouth, nausea, somnolence, tremor.

In an 8-week, randomized, double-blind study in patients with schizophrenia, schizophreniform disorder, or schizoaffective disorder comparing fixed doses of 10, 20, and 40 mg/d, statistically significant differences were seen between doses for the following: baseline to endpoint weight gain, 10 vs 40 mg/d; incidence of treatment-emergent prolactin elevations >24.2 ng/mL (female) or >18.77 ng/mL (male), 10 vs 40 mg/d and 20 vs 40 mg/d; fatigue, 10 vs 40 mg/d and 20 vs 40 mg/d; and dizziness, 20 vs 40 mg/d.

**Vital Sign Changes—**Oral olanzapine was associated with orthostatic hypotension and tachycardia in clinical trials. Intramuscular olanzapine for injection was associated with bradycardia, hypotension, and tachycardia in clinical trials (see PRECAUTIONS).

**Weight Gain—**In placebo-controlled 6-week schizophrenia studies, weight gain was reported in 5.6% of oral olanzapine patients (average 2.8-kg gain) compared to 0.8% of placebo patients (average 0.4-kg loss); 29% of olanzapine patients gained >7% of their baseline weight, compared to 3% of placebo patients. During continuation therapy (238 median days of exposure), 56% of patients met the criterion for having gained >7% of their baseline weight. Average gain during long-term therapy was 5.4 kg.

**Laboratory Changes—**Olanzapine is associated with asymptomatic increases in SGPT, SGOT, and GGT and with increases in serum prolactin and CPK (see PRECAUTIONS). Asymptomatic elevation of eosinophils was reported in 0.3% of olanzapine patients in premarketing trials. There was no indication of a risk of clinically significant neutropenia associated with olanzapine in the premarketing database.

In clinical trials among olanzapine-treated patients with baseline random triglyceride levels of <150 mg/dL (N=659), 0.5% experienced triglyceride levels of ≥500 mg/dL anytime during the trials. In these same trials, olanzapine-treated patients (N=1185) had a mean triglyceride increase of 20 mg/dL from a mean baseline of 175 mg/dL. In placebo-controlled trials, olanzapine-treated patients with baseline random cholesterol levels of <200 mg/dL (N=1034) experienced cholesterol levels of ≥240 mg/dL anytime during the trials more often than placebo-treated patients (N=602; 3.6% vs 2.2% respectively). In these same trials, olanzapine-treated patients (N=2528) had a mean increase of 0.4 mg/dL in cholesterol from a mean baseline of 203 mg/dL, which was significantly different compared to placebo-treated patients (N=1415) with a mean decrease of 4.6 mg/dL from a mean baseline of 203 mg/dL.

**ECG Changes—**Analyses of pooled placebo-controlled trials revealed no statistically significant olanzapine/placebo differences in incidence of potentially important changes in ECG parameters, including QT, QTc, and PR intervals. Olanzapine was associated with a mean increase in heart rate of 2.4 BPM compared to no change among placebo patients.

**Other Adverse Events Observed During Clinical Trials—**The following treatment-emergent events were reported with oral olanzapine at multiple doses ≥1 mg/d in clinical trials (8661 patients, 4165 patient-years of exposure). This list may not include events previously listed elsewhere in labeling, those events for which a drug cause was remote, those terms which were so general as to be uninformative, and those events reported only once or twice which did not have a substantial probability of being acutely life-threatening. **Frequent** events occurred in ≥1/100 patients; **infrequent** events occurred in 1/100 to 1/1000 patients; **rare** events occurred in <1/1000 patients. **Body as a Whole—Frequent:** dental pain, flu syndrome; **Infrequent:** abdomen enlarged, chills, face edema, intentional injury, malaise, moniliasis, neck pain, neck rigidity, pelvic pain, photosensitivity reaction, suicide attempt; **Rare:** chills and fever, hanger effect, sudden death. **Cardiovascular—Frequent:** hypotension; **Infrequent:** atrial fibrillation, bradycardia, cerebrovascular accident, congestive heart failure, heart arrest, hemorrhage, migraine, pallor, palpitation, vasodilatation, ventricular extrasystoles; **Rare:** arteritis, heart failure, pulmonary embolus. **Digestive—Frequent:** flatulence, increased salivation, thirst; **Infrequent:** dysphagia, esophagitis, fecal impaction, fecal incontinence, gastritis, gastroenteritis, gingivitis, hepatitis, melena, mouth ulceration, nausea and vomiting, oral moniliasis, periodontal abscess, rectal hemorrhage, stomatitis, tongue edema, tooth caries; **Rare:** aphthous stomatitis, enteritis, eructation, esophageal ulcer, glossitis, ileus, intestinal obstruction, liver fatty deposit, tongue discoloration. **Endocrine—Frequent:** diabetes mellitus; **Rare:** diabetic acidosis, goiter. **Hemic and Lymphatic—Frequent:** anemia, cyanosis, leukocytosis, leukopenia, lymphadenopathy, thrombocytopenia; **Rare:** normocytic anemia, thrombocythemia. **Metabolic and Nutritional—Frequent:** acidosis, alkaline phosphatase increased, bilirubinemia, dehydration, hypercholesterolemia, hyperglycemia, hyperlipidemia, hyperuricemia, hypoglycemia, hypokalemia, hyponatremia, lower extremity edema, upper extremity edema; **Rare:** gout, hyperkalemia, hypernatremia, hypoproteinemia, ketosis, water intoxication. **Musculoskeletal—Frequent:** joint stiffness, twitching; **Infrequent:** arthritis, arthrosis, leg cramps, myasthenia; **Rare:** bone pain, bursitis, myopathy, osteoporosis, rheumatoid arthritis. **Nervous System—Frequent:** abnormal dreams, amnesia, delusions, emotional lability, euphoria, manic reaction, paresthesia, schizophrenic reaction; **Infrequent:** akinesia, alcohol misuse, antisocial reaction, ataxia, CNS stimulation, cogwheel rigidity, delirium, dementia, depersonalization, dysarthria, facial paralysis, hypesthesia, hypokinesia, hypotonia, incoordination, libido decreased, libido increased, obsessive compulsive symptoms, phobias, somatization, stimulant misuse, stupor, stuttering, tardive dyskinesia, vertigo, withdrawal syndrome; **Rare:** circumoral paresthesia, coma, encephalopathy, neuralgia, neuropathy, nystagmus, paralysis, subarachnoid hemorrhage, tobacco misuse. **Respiratory—Frequent:** dyspnea; **Infrequent:** apnea, asthma, epistaxis, hemoptysis, hyperventilation, hypoxia, laryngitis, voice alteration; **Rare:** atelectasis, hiccup, hypoventilation, lung edema, stridor. **Skin and Appendages—Frequent:** sweating; **Infrequent:** alopecia, contact dermatitis, dry skin, eczema, maculopapular rash, pruritus, seborrhea, skin discoloration, skin ulcer, urticaria, vesiculobullous rash; **Rare:** hirsutism, pustular rash. **Special Senses—Frequent:** conjunctivitis; **Infrequent:** abnormality of accommodation, blepharitis, cataract, deafness, diplopia, dry eyes, ear pain, eye hemorrhage, eye inflammation, eye pain, ocular muscle abnormally, taste perversion, tinnitus; **Rare:** corneal lesion, glaucoma, keratoconjunctivitis, macular hypopigmentation, miosis, mydriasis, pigment deposits lens. **Urogenital—Frequent:** vaginitis; **Infrequent:** abnormal ejaculation, amenorrhea, breast pain, cystitis, decreased menstruation, dysuria, female lactation, glycosuria, gynecostasia, hematuria, impotence, increased menstruation, menorrhagia, metrorrhagia, polyuria, premenstrual syndrome, pyuria, urinary frequency, urinary retention, urinary urgency, urination impaired, uterine fibroids enlarged, vaginal hemorrhage; **Rare:** albuminuria, breast enlargement, mastitis, oliguria. (\*Adjusted for gender.)

The following treatment-emergent events were reported with intramuscular olanzapine for injection at one or more doses ≥2.5 mg/injection in clinical trials (722 patients). This list may not include events previously listed elsewhere in labeling, those events for which a drug cause was remote, those terms which were so general as to be uninformative, and those events reported only once or twice which did not have a substantial probability of being acutely life-threatening. **Body as a Whole—Frequent:** injection site pain; **Infrequent:** abdominal pain, fever. **Cardiovascular—Frequent:** AV block, heart block, syncope. **Digestive—Frequent:** diarrhea, nausea. **Hemic and Lymphatic—Frequent:** anemia. **Metabolic and Nutritional—Frequent:** creatine phosphokinase increased, dehydration, hyperkalemia. **Musculoskeletal—Frequent:** twitching. **Nervous System—Frequent:** abnormal gait, akathisia, articulation impairment, confusion, emotional lability. **Skin and Appendages—Frequent:** sweating.

**Postintroduction Reports—**Reported since market introduction and temporally (not necessarily causally) related to olanzapine therapy: allergic reaction (eg, anaphylactoid reaction, angioedema, pruritus or urticaria), diabetic coma, jaundice, neutropenia, pancreatitis, priapism, rhabdomyolysis, and venous thromboembolic events (including pulmonary embolism and deep venous thrombosis). Random cholesterol levels of ≥240 mg/dL and random triglyceride levels of ≥1000 mg/dL have been reported.

**DRUG ABUSE AND DEPENDENCE:** Olanzapine is not a controlled substance. ZYPREXA is a registered trademark of Eli Lilly and Company. ZYDIS is a registered trademark of Cardinal Health, Inc. or one of its subsidiaries.

Literature revised November 30, 2006

PV 5197 AMP PRINTED IN USA

**Lilly** Eli Lilly and Company  
Indianapolis, IN 46285, USA

www.ZYPREXA.com

ZYPREXA® (Olanzapine Tablets)  
ZYPREXA® ZYDIS® (Olanzapine Orally Disintegrating Tablets)  
ZYPREXA® IntraMuscular (Olanzapine for Injection) PV 5197 AMP

A56

# Psych Oral Board Tutorials

## Now, 3-day practice orals course limited to 20 students

- ◆ Opening sessions will teach oral exam skills
- ◆ Fees include doing two practice oral exams
- ◆ One live-patient and one video taped interview
- ◆ Each exam is 1¼ hours – time enough for hour interview and exam as well as faculty evaluation
- ◆ Senior faculty include former board examiners
- ◆ Weekend 4 to 10 weeks before your oral boards

July 7-9, 2007 – Chicago

- ◆ In board exam city just before your oral boards

May 3-5 – New York

June 5-7 – Indianapolis

September 6-8 – Milwaukee

- ◆ You may buy extra private and public practice exams based on patient interview or videotape

www.psychtutor.net/m74a 800-285-3283

When you positively must pass

## Join APA at The Annual Meeting and Qualify for a Rebate

### How Do I Qualify?

You may qualify if you:

1. Are a psychiatrist residing in the U.S. or Canada and,
2. Have paid the full-time registration fee for the Annual Meeting (\$805 advance, \$880 on-site).

### How Do I Apply?

1. Stop by one of the Membership booths either in the Registration area (near the Registrar) or in the APA Member Center (Exhibit Hall B) to fill out an APA Membership Application. The Application must be submitted on-site during the meeting at one of these locations.
2. Additional documentation (proof of ACGME- AOA, or RCPS(C)-approved psychiatry residency training and a current, valid medical license) must be received by APA no later than June 30, 2007.

### How Does The Rebate Work?

1. Your local psychiatric district/branch must approve the application no later than September 30, 2007.
2. The difference between the member and non-member rate will be applied toward your pre-rated 2007 national and local dues. The remaining balance of the rebate amount will be sent directly to you or if you choose, we can apply the remaining balance to your 2008 dues.\* It's up to you!

### Why Should I Join?

Please stop by one of the Membership booths to learn more about the many benefits and privileges of APA membership

\*Outstanding dues from previous years may be deducted in some cases.

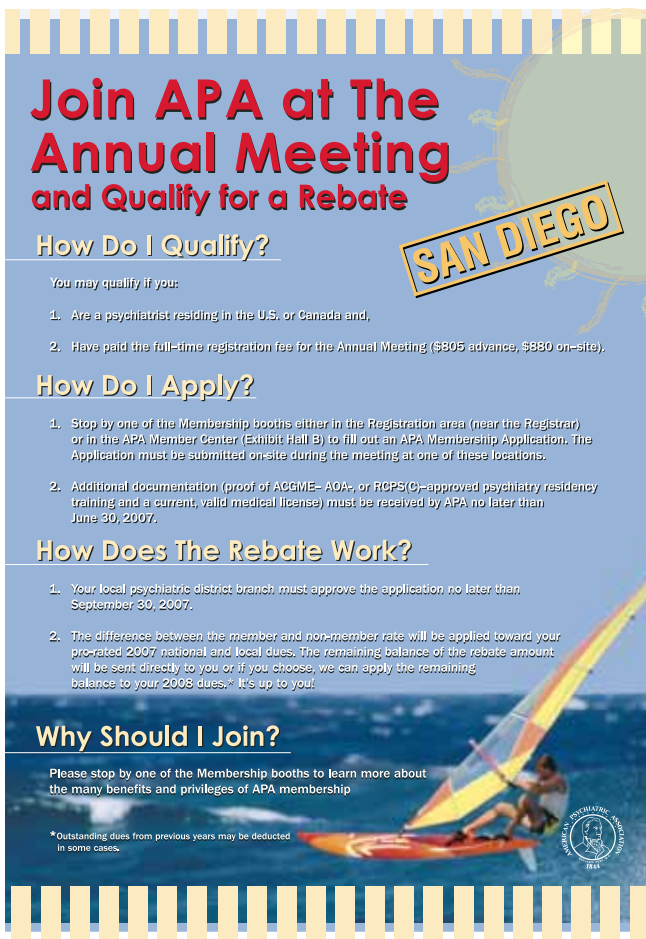

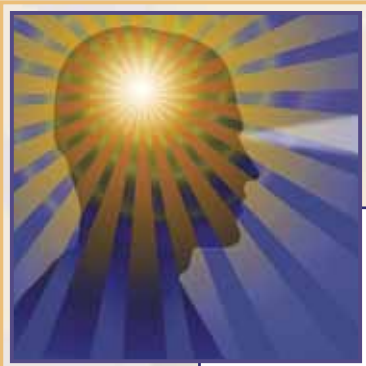

# STAR\*D Findings

*Implications for Patients,  
Clinicians, and Other  
Stakeholders*

**Sunday, May 20, 2007 • 7:00–10:00 pm**

*Manchester Grand Hyatt, Manchester Ballroom, Second Level*

*Presented  
at the  
APA 2007  
Annual  
Meeting in  
San Diego,  
California*

## STATEMENT OF NEED

The Sequenced Treatment Alternatives to Relieve Depression (STAR\*D) trial was a large-scale study designed to emulate real-world clinical management of major depressive disorder (MDD). STAR\*D included a representative population of depressed patients and provided for timely medication dose adjustments and switching, augmentation and combination treatment strategies when remission was not achieved. At the completion of such a large trial and analysis of the findings, it is natural for investigators to reflect and ask, so what? What did we learn? What does this mean to the patient, clinician, and other stakeholders?

What next? In this interactive symposium, the presenters will address these questions. Throughout the presentation of the key findings from Level 1, 2, 3, and 4 of STAR\*D, the faculty and the audience will be invited to pose questions that will facilitate the translation of the data into real-world clinical practice. Audience response polling will provide further insights into clinicians' perspectives on the clinical practice tools available to measure symptoms, side effects, response, remission, and relapse.

## LEARNING OBJECTIVES

At the conclusion of this symposium, the participant should be able to:

1. Apply data from large-scale research studies to clinical practice.
2. Translate switching, augmentation, and combination data from STAR\*D and apply to clinical practice.
3. Identify augmentation strategies in MDD that may improve patient outcomes.
4. Evaluate emerging therapies that may help patients achieve remission and improve long-term outcomes.

## REGISTRATION

Attendees must be registered for the APA Annual Meeting to attend this symposium. Seating is limited and will be based on first-come, first-served. For more information about the meeting, please visit the APA website at [www.psych.org](http://www.psych.org) or contact the APA toll-free at 1-888-357-7924 (within the U.S. or Canada) or 703-907-7300.

## PROGRAM AGENDA

|               |                                                                                                                                                                                  |
|---------------|----------------------------------------------------------------------------------------------------------------------------------------------------------------------------------|
| 6:30–7:00 pm  | <b>Dinner</b>                                                                                                                                                                    |
| 7:00–7:15 pm  | <b>Introduction</b><br><i>Grayson S. Norquist, MD, MSPH (Chair)</i><br>University of Mississippi Medical Center                                                                  |
| 7:15–7:35 pm  | <b>Clinical Methods and Procedures to Enhance Acute and Long-Term Outcomes</b><br><i>Junius J. Gonzales, MD, MBA</i><br>Abt Associates, Inc.<br>The George Washington University |
| 7:35–7:45 pm  | <b>Interactive Panel Discussion</b>                                                                                                                                              |
| 7:45–8:05 pm  | <b>Selecting Among First- and Second-Step Acute Treatments: Level 1 and Level 2</b><br><i>Marlene Freeman, MD</i><br>University of Arizona Health Sciences Center                |
| 8:05–8:15 pm  | <b>Interactive Panel Discussion</b>                                                                                                                                              |
| 8:15–8:35 pm  | <b>Treatments After the First Two Steps, Including Follow-Up: Level 3 and Level 4</b><br><i>A. John Rush, MD</i><br>University of Texas Southwestern Medical Center              |
| 8:35–8:45 pm  | <b>Interactive Panel Discussion</b>                                                                                                                                              |
| 8:45–9:05 pm  | <b>The Role of Other Treatment Options in the Management of Depression</b><br><i>K. Ranga Krishnan, MB, ChB</i><br>Duke University Medical Center                                |
| 9:05–9:15 pm  | <b>Interactive Panel Discussion</b>                                                                                                                                              |
| 9:15–10:00 pm | <b>Panel Discussion/Q&amp;A</b>                                                                                                                                                  |

## CREDIT DESIGNATION

The APA designates this educational activity for a maximum of 3 *AMA PRA Category 1 Credits™*. Physicians should only claim credit commensurate with the extent of their participation in the activity.

## ACCREDITATION STATEMENT

The American Psychiatric Association (APA) is accredited by the Accreditation Council for Continuing Medical Education to provide continuing medical education for physicians.

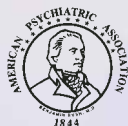

Sponsored  
by the  
American  
Psychiatric  
Association

Supported by an educational grant from

 **Forest Pharmaceuticals, Inc.**  
Pharmaceuticals • Therapeutics • Healthcare • Ethicare • Managed Care • Specialty Sales

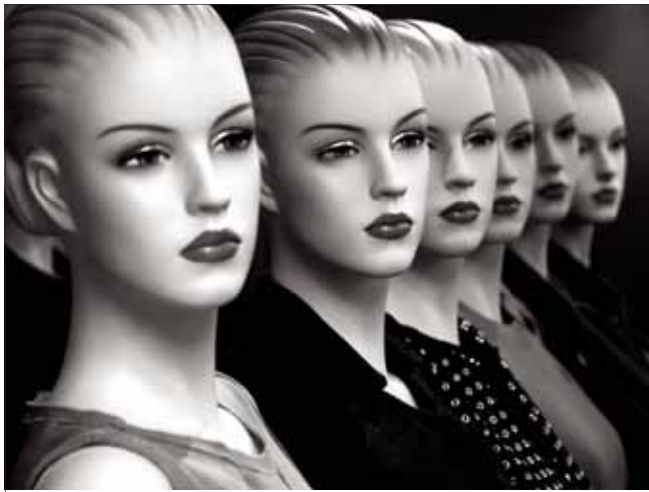

**Are you tired of generic, one-size-fits-all behavioral healthcare?**

More and more physicians are turning to Acadia Healthcare for what's important to them: greater personal and professional reward, collegiality, a unique atmosphere and the respect and support of a great physician-led team.

You owe it to yourself to investigate the possibilities with Acadia.

**Acadia Healthcare**

Phone: 888.392.2234 · Fax: 770.776.5533  
 physicianrecruiting@acadiahealthcare.com  
*Opportunities nationwide. J1 and H1 Visa opportunities in Texas.*

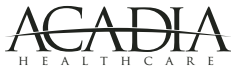

[www.acadiahealthcare.com](http://www.acadiahealthcare.com)  
 Child - Adolescent - Geriatric - Dual Diagnosis

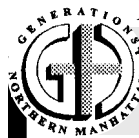

NEW YORK MEDICAL COLLEGE

*Invest In  
Your Career.*

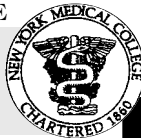

**ATTENDING  
PSYCHIATRIST**

New York Medical College, a prestigious health sciences university providing patient care, teaching and research; seeks a dedicated physician for multi-specialty faculty practice at its clinical-campus affiliate in New York City. The board certified/board eligible psychiatrist will work on an Assertive Community Treatment Team (ACT-Program) at Metropolitan Hospital in Manhattan.

We offer a salary commensurate with credentials. Please submit CV to:

**Ms. Justice Shillingford  
Personnel Coordinator  
NEW YORK MEDICAL COLLEGE  
METROPOLITAN HOSPITAL CENTER  
1901 First Ave, Ste 16A, NY, NY 10029  
or fax it to: 212-423-6318;  
or email to: [j\\_shillingford@nymc.edu](mailto:j_shillingford@nymc.edu)**

**OPEN RANK**

**West Virginia University/Charleston Division Department of Behavioral Medicine & Psychiatry** is seeking a board-certified or board eligible psychiatry faculty physician for a full-time faculty position. Fully accredited psychiatry and psychology programs where you can enjoy a mixture of teaching, inpatient and outpatient care, and opportunities for professional growth. Share your expertise with residents, medical students, and psychology interns. Scholarly work is supported and encouraged. Interest in Emergency Psychiatry and Consult Liaison Psychiatry are recommended but not required.

We offer a competitive salary and an excellent benefit package. Charleston, the capitol of West Virginia, offers a family-oriented, very safe small-city environment with excellent recreational, cultural, and educational opportunities.

Send letter of inquiry and CV to:

Martin J. Kommor, M.D.  
 WVU Dept. of Behavioral Medicine & Psychiatry  
 P.O. Box 1547, Charleston, WV 25326  
[martin.kommor@camc.org](mailto:martin.kommor@camc.org) or call 304-341-1532

Application deadline: The search will remain active until the position is filled.

West Virginia University is an Affirmative Action/Equal Employment Opportunity Employer.  
 Women and Minorities are encouraged to apply.

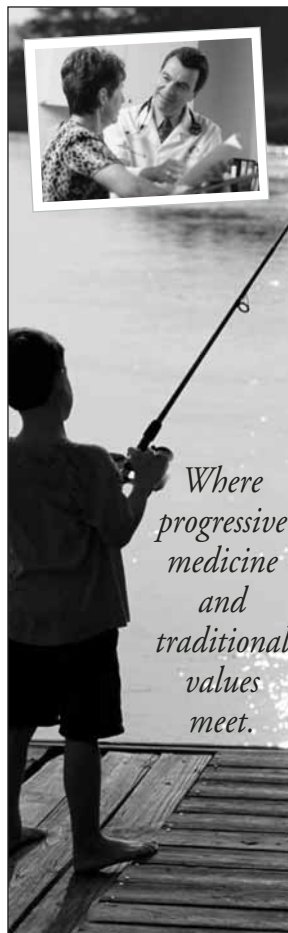

*Where  
progressive  
medicine  
and  
traditional  
values  
meet.*

**Marshfield Clinic** is nationally recognized for providing physicians with the most advanced medical equipment and health information technology today. Surrounded by nature's beauty in Wisconsin, we are located in communities where neighbors know one another.

**We have openings for Adult and Child and Adolescent Psychiatrists for our expanding services.**

Marshfield Clinic is a multi-specialty group practice with over 725 physicians located at 40 centers in Wisconsin. The Clinic's Research Foundation has a history of important medical discoveries in human genetics and support for clinical research.

To learn more about these opportunities and the very competitive compensation package, please contact: Beth Albee, Physician Recruitment, **Marshfield Clinic**, 1000 N. Oak Ave., Marshfield, WI 54449. Phone: 800-782-8581, extension 19775; Fax #: 715-221-9779.

E-mail: [albee.beth@marshfieldclinic.org](mailto:albee.beth@marshfieldclinic.org)  
 Website: [www.marshfieldclinic.org/recruit](http://www.marshfieldclinic.org/recruit)

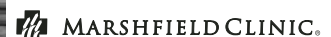

*Where the future of medicine lives*

Marshfield Clinic is an Affirmative Action/Equal Opportunity employer that values diversity. Minorities, females, individuals with disabilities and veterans are encouraged to apply.



## PSYCHIATRISTS *The VA Needs You*

Shreveport, Louisiana, Alexandria, Louisiana,  
Biloxi, Mississippi, Pensacola, Florida,  
Mt. Vernon, Missouri, Fayetteville, Arkansas

Psychiatrist positions require: BE/BC Psychiatrists, current, full, unrestricted licensure (any state), U.S. citizen. Great Benefits, Excellent Pay, Rewarding Work. See announcements on [www.vacareers.va.gov](http://www.vacareers.va.gov).

**BILOXI/PENSACOLA** Outpatient and Inpatient Psychiatry positions. Expertise in substance abuse, geropsychiatry and PTSD preferred. BE/BC psychiatrist, state license (any state), U.S. citizen or permanent resident. Send applications to Jean Williams, HRMS (05A), 400 Veterans Avenue, Biloxi, MS or contact at [jean.williams@med.va.gov](mailto:jean.williams@med.va.gov) or (228) 523-5633.

**ALEXANDRIA** Strong clinical skills. Prefer experience in Geropsychiatry, Substance Abuse and/or PTSD. CV/ Application to [tammie.arnold@med.va.gov](mailto:tammie.arnold@med.va.gov) or Tammie Arnold, Psychiatry Service (116), P.O. Box 69004, Alexandria, LA 71306-9004. (318) 473-0010 ext 2696.

**SHREVEPORT** Prefer experience in Substance Abuse, PTSD. Contact Tracie Bennett at (318) 221-8411, ext 5118 or [tracie.bennett@va.gov](mailto:tracie.bennett@va.gov). Email or mail your CV to VAMC, HRMS (05) TB, 510 E. Stoner Ave, Shreveport, LA. (318) 221-8411, ext 5118.

**FAYETTEVILLE, MT. VERNON** Contact Laura Berg, HRMS, at [laura.berg@med.va.gov](mailto:laura.berg@med.va.gov) or (479) 443-4301, ext 5191.

## PSYCHIATRIST

The Louis A. Johnson VA Medical Center, Clarksburg, WV, is seeking an inpatient/outpatient staff psychiatrist. Board certified preferred, board eligible required, specialty of psychiatry. Requirements include MD or DO degree, successful completion of a residency program, and licensed to practice medicine in any state of the United States.

**US CITIZEN PREFERRED.  
MALPRACTICE INSURANCE PROVIDED.  
EXCELLENT BENEFITS PACKAGE.**

Interested candidates may view  
the vacancy announcement at  
[www.usajobs.opm.gov](http://www.usajobs.opm.gov).

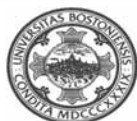

## Boston University School of Medicine

### CHIEF OF CHILD PSYCHIATRY

The Division of Psychiatry at Boston Medical Center and Boston University School of Medicine is seeking a Chief of Child Psychiatry at the Associate Professor or Professor level. The Chief will lead a group of clinicians, teachers, and researchers in the section of Child Psychiatry within the Division of Psychiatry. The successful applicant should have a strong administrative background, exceptional clinical skills, and a commitment to teaching medical students, psychiatry residents, psychology trainees, social work trainees, psychiatric nurses, and mental health counselors. The Chief must have strong interpersonal skills and work closely with Pediatrics and the Emergency Department. There are opportunities for research collaboration in the areas of substance abuse, post traumatic stress disorder, eating disorders, developmental disorders, health services, and neuroimaging. Boston Medical Center is the primary teaching hospital of Boston University School of Medicine.

BMC and BU are Affirmative Action/ Equal Opportunity Employers.

Candidates should send a cover letter and CV to:

Domenic A. Ciraulo, M.D., Professor and Chairman  
Division of Psychiatry, Boston University School of Medicine  
720 Harrison Ave, Doctors Office  
Building, Suite 914  
Boston, MA 02118  
or e-mail to [dciraulo@bu.edu](mailto:dciraulo@bu.edu)

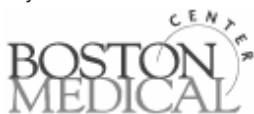

## The University of Pittsburgh School of Medicine Department of Psychiatry Western Psychiatric Institute and Clinic

IS CURRENTLY SEEKING A

### MEDICAL DIRECTOR For the EATING DISORDERS PROGRAM

The UPMC Health System is rated as "One of America's Best Hospitals" by *U.S. News & World Report*. The University of Pittsburgh Department of Psychiatry & Western Psychiatric Institute and Clinic is also the leading recipient in National Institutes of Health research funding and a world class training institution. The combination of these two resources provides for exciting clinical and academic opportunities.

As Medical Director of the Eating Disorders Program, the successful candidate will work with an experienced and productive multi-disciplinary treatment team that includes psychiatrists, psychologists, social workers, nurses, and dietitians. The successful candidate must be board certified/eligible in Child and Adolescent or Adult Psychiatry. This position will be a full-time, non-tenured faculty position at the appropriate rank. Opportunities are available to collaborate in ongoing clinical research.

The University of Pittsburgh School of Medicine and UPMC Health System offer competitive compensation and an excellent benefits package.

Interested candidates should e-mail their curriculum vita and letter of interest to [teagardendr@upmc.edu](mailto:teagardendr@upmc.edu) or US mail before July 31, 2007 to:

**Debra Teagarden**  
Director, Faculty & Physician Recruitment  
Western Psychiatric Institute and Clinic  
3811 O'Hara Street - Suite 279  
Pittsburgh, PA 15213

The University of Pittsburgh is an Affirmative Action, Equal Opportunity Employer

# ADULT PSYCHIATRY OPPORTUNITY

## GEISINGER HEALTH SYSTEM

Geisinger Health System's Division of Psychiatry in Danville, PA, is seeking an adult psychiatrist. This position offers an excellent quality of life and an opportunity to work part-time or full-time depending on the needs of the candidate.

### This position offers:

- A flexible schedule – start/end times are negotiable, and the specific psychiatric interests and talents of applicants usually can be integrated into the needs of the practice. Opportunities include inpatient – outpatient – emergency – and consultation-liaison psychiatry.
- A wonderfully collaborative team of psychiatrists/psychologists with experience and expertise in a variety of psychiatric specialties.
- The support of multiple PAs, a nurse specialist and masters-level therapists.
- An excellent call schedule (1 in 7), most call via telephone from home.
- The opportunity to work in a comprehensive academic practice that sees a wide variety of clinical activity from pediatric to geriatric patients and diagnostic types and treatments (including ECT).
- Research opportunities through the Weis Center for Research and Geisinger Center for Health Research (both located on the campus of Geisinger Medical Center). Current research projects include studies on genomic schizophrenia, adolescent depression and improving the delivery of adult depression through primary care.
- An accredited Clinical Psychology Internship and the opportunity to teach pediatric and emergency medicine residents, as well as third year medical students from Temple University and Pennsylvania College of Osteopathic Medicine, with clinical appointments available.
- An established referral base through Geisinger Health System's 40 community medical groups, 3 hospitals, local/community physicians and the broad-base of third party contracts.

In the past two years Geisinger's Department of Psychiatry has added a 10-bed Adolescent Inpatient Unit at Geisinger South Wilkes-Barre, the neuro-psychiatry practice has doubled and added 2 post-doctoral fellows and Pediatric Psychiatry has experienced significant growth. At Geisinger, you'll experience the support, camaraderie and professional challenges of a leading practice while discovering the charms of Pennsylvania living... all while having the time and flexibility to enjoy your new quality of life.

### To discuss this opportunity, contact:

Kathy Kardisco, Recruiter, Geisinger Dept. of Pro. Staffing,  
100 North Academy Avenue, Danville, PA 17822-2428  
Phone: 1-800-845-7112 • Fax: 1-800-622-2515  
e-mail: [kkardisco@geisinger.edu](mailto:kkardisco@geisinger.edu)

*Geisinger is a drug-screening employer; EOE/IF/D/V.*

# GEISINGER

[WWW.GEISINGER.ORG/DOCJOBS](http://WWW.GEISINGER.ORG/DOCJOBS)

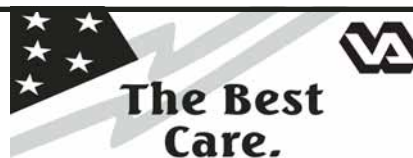

## STAFF PSYCHIATRISTS

The Louisville, Kentucky Veterans Affairs Medical Center (VAMC), an affiliate of the University of Louisville (U of L) School of Medicine, is seeking candidates for three Staff Psychiatrist positions:

**Behavioral Health Psychiatrist:** FT position (1/2 time admin-1/2 time clinical) for Behavioral Health Lab with focus on integration of Primary Care & Mental Health. **General Outpatient Psychiatrist:** FT position to provide outpatient care at Community Based Outpatient Clinic (CBOC) located in New Albany, IN. **PTSD Psychiatrist:** PT (20 hours per week); located at Dupont (CBOC) Louisville, KY; to be assigned to PTSD Clinical Team.

Candidates must be BC/BE in Psychiatry, hold an unrestricted license, and qualify for an academic appointment at U of L. Our Mental Health & Behavioral Sciences Service (MH&BSS) is a major training site for U of L psychiatry residents and medical students, and psychology, nursing, and social work students, and plays an active role in U of L's research program. MH&BSS has a nationally recognized treatment model including outpatient and inpatient treatment, ER, consultation-liaison, and healthcare for homeless veterans.

The VA offers an attractive salary, excellent government benefits and assumes liability for tort claims associated with employees' official VA duties; individual malpractice insurance is not required for this purpose. Education Debt Reduction Program (EDRP) funding may be available for candidates selected for employment. Moving expenses are not authorized.

### The VA is an equal opportunity employer.

Candidates who apply early will receive first consideration. Interested candidates should send C.V. and cover letter, to be received not later than 4/30/07, to: Kimberly Suiter, HRMS (05L); VA Medical Center; 800 Zorn Avenue; Louisville, KY 40206-1499; Telephone (502) 287-5870; Fax (502) 287-6142; E-mail [Kimberly.Suiter@va.gov](mailto:Kimberly.Suiter@va.gov).

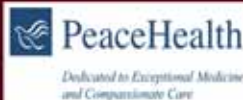

## SEEKING AN EXCEPTIONAL PSYCHIATRIST

PeaceHealth Medical Group in Eugene, Oregon, is a 120-physician multi-specialty group seeking a BE/BC Psychiatrist to join our inpatient Behavioral Health team. We are associated with Sacred Heart Medical Center, a 432-bed level-two trauma regional medical center. We offer a highly competitive pay system, full malpractice coverage and great benefits.

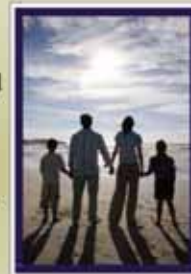

EUGENE, OREGON is one of the most desirable cities in the Pacific Northwest in which to live, work and play. The area is extraordinarily rich in recreational areas as well as cultural activities and the arts. Eugene is located in the heart of the Willamette Valley and is within an hours drive of adventures at the beach with amazing cliffs and sand dunes or at the snow peaked mountains with hundreds of different ski runs.

*PeaceHealth is an EEO and Affirmative Action Employer*

Email your CV to Dorothy Reed at [dreed@peacehealth.org](mailto:dreed@peacehealth.org) or  
Fax to (541) 681-3072.

# ST. JOHN'S Clinic

## DREAM LOCATION FOR CHILD & ADOLESCENT/ADULT PSYCHIATRISTS

St. John's Clinic is seeking energetic board certified/eligible Child & Adolescent and Adult Psychiatrists to join their well-established, busy Psychiatry Department, in lovely Springfield, Missouri. Inpatient and outpatient practice with large referral base. The inpatient unit is conveniently located close to the physician office building. The department is part of St. John's Clinic, a progressive and growing multispecialty clinic of 470+ physicians in an integrated health care delivery system. For more information about St. John's Health System, please visit [www.stjohns.com](http://www.stjohns.com). St. John's was recently ranked among the TOP 10 in patient satisfaction.

Position offers a competitive salary guarantee. In addition, there is bonus potential and a full array of benefits including health, dental, vision, life and disability insurance, malpractice, CME, vacation, retirement, and relocation.

**SPRINGFIELD, MISSOURI**, (pop. 200,000) is a growing, sophisticated community. It is home to Missouri's second largest university and a regional home to the arts (symphony, ballet, and theater) and NCAA and semi-professional sports teams (football, basketball, baseball, and hockey). *Employment Review* has named Springfield one of the 10 "Best Places to Live and Work" in the U.S. For more information about Springfield, go to [www.springfieldmo.org](http://www.springfieldmo.org). EOE/AA Employer.

For more information, contact:

Julie Oliver, Physician Recruiter  
St. John's Clinic  
1965 S. Fremont, Suite 320  
Springfield, MO 65804  
Phone: (800) 218-5079; Fax: (888) 290-8300  
[jaoliver@sprg.mercy.net](mailto:jaoliver@sprg.mercy.net)

## COLUMBIA UNIVERSITY Health Services at Columbia Psychiatrist

*Counseling and Psychological Services, a unit of Student Health Services, seeks licensed mental health professional to work with a diverse student population in a dynamic and challenging academic environment.*

Crisis intervention, psychopharmacological evaluations and consultations, medication maintenance, community referral. NYS M.D. license with a specialization/residency in psychiatry. Minimum 3 years acceptable clinical experience. Strong clinical psychiatric and collaborative skills. In-patient psychiatric experience and demonstrated ability to work with serious psychopathology preferably with university/college students. Position can be full-time or part-time. Some on-call hours required.

Competitive salary and benefits including tuition exemption for employee and dependents.

Interested candidates should apply at:  
[http://jobs.columbia.edu/applicants/  
Central?quickFind=104235](http://jobs.columbia.edu/applicants/Central?quickFind=104235)

Columbia University is an affirmative action/equal opportunity employer.

*The medical teams are just always there.  
Thank goodness.*

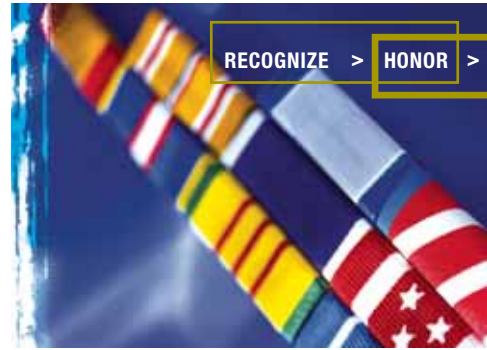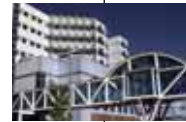

Choice is a powerful thing. And as a Psychiatrist, you look for the chance to impart a level of care that speaks to your values. At the **Portland VA Medical Center in Portland, Oregon**, we are a leading teaching facility with key educational affiliations. Our areas of focus are specific to medicine, surgery, psychiatry, physical medicine and rehabilitation, neurology, oncology, dentistry, and geriatrics with liver and renal transplant programs. Currently, we have the following opportunities:

### Psychiatrists

We have exceptional opportunities for Psychiatrists in several areas including Manager/Mental Health Clinic, and Associate Director for the Mental Health and Neurosciences Division. Candidates must be a licensed Physician with relevant work experience, and be board-certified or board-eligible in Psychiatry through the American Board of Psychiatry/Neurology. Requires the ability to provide evidence of an active, current, full and unrestricted license to practice medicine or surgery in a State, Territory or Commonwealth of the U.S. or the District of Columbia.

The Pacific Northwest offers a renowned green, clean environment, with a host of events to rival its natural beauty. Portland, in particular, sits in the shadows of spectacular Mount Hood, and combines beaches, forests, rivers, and mountains with fine dining, museums, and cultural sophistication.

The Portland VA Medical Center offers competitive salaries with an excellent benefits package including up to 26 days of vacation. Pre-employment physical and drug testing may be required. In addition, all positions, unless otherwise specified, are open to qualified U.S. Citizens. **For more information, contact Jaime Cervantez: outside Portland area, call (800) 949-1004 ext. 57381; Portland area, call (503) 220-8262, ext. 57381; E-mail: [portland.vajobs@va.gov](mailto:portland.vajobs@va.gov), or visit our Web site at: [www.visn20.med.va.gov/portland](http://www.visn20.med.va.gov/portland).**

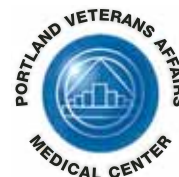

Portland VA Medical Center is an Equal Opportunity Employer.

visn20.med.va.gov/portland  
WWW

# PSYCHIATRISTS

The Department of Veterans Affairs, Central Texas Veterans Health Care System (CTVHCS), is accepting applications for several positions for board-certified Psychiatrists at Temple and Waco, Texas. CTVHCS is affiliated with the Texas A&M University Health Science Center. Applicants with interest in teaching and research will be given preference. CTVHCS offers competitive salaries and excellent benefits.

Applicants are required to have expertise in treatment of at least one of the following patient populations: the seriously mentally ill, PTSD or provision of mental health in primary care clinics.

In addition to its close proximity to the metropolitan Austin area famous for its live entertainment, Central Texas offers affordable housing, excellent schools, one of the lowest costs of living in the country and year-round recreational opportunities highlighted by the lakes and rivers of the Texas Hill Country. Texas has no state income tax.

Candidates must be US citizens or permanent residents, as well as possess a valid and unrestricted medical license in at least one state. Reasonable accommodation provided to any applicant with disabilities. Applicants are subject to drug testing. EOE

Please Fax or send CV to:

**Mary P. Doerfler, Physician Recruiter**  
**Central Texas Veterans Health Care System**  
**1901 Veterans Memorial Drive, Temple, TX 76504**  
**FAX (254) 743-0007 ,Voice (254) 743-0049**  
**E-mail to [Mary.Doerfler@va.gov](mailto:Mary.Doerfler@va.gov)**

## THE **MIND** INSTITUTE

*Mental Illness and  
Neuroscience Discovery*

The MIND Institute, located in Albuquerque, New Mexico, is part of a national science network committed to expanding the boundaries of neuroscience research, leading to a better understanding of human behavior and discovering new approaches to the diagnosis and treatment of mental illness and other brain disorders.

We are looking for both junior and senior research scientists and clinicians to join our organization with expertise in schizophrenia and psychosis, addiction and antisocial disorders, and both normal learning and learning in neurodevelopmental disorders. Candidates should have experience with neuroscience imaging technologies, clinical mental health experience, and strong organizational skills. M.D. or Ph.D. required.

Our research programs employ a variety of imaging methods including structural MRI, functional MRI, spectroscopy, diffusion tensor imaging, electro- and magneto-encephalography, as well as genetic, neuropsychological and psychiatric assessments. The MIND has recently obtained the first mobile MRI dedicated to performing brain imaging research in inmates, warfighters and other remote populations. Along with developing new technologies to reduce learning time and increase retention, we are also pursuing innovative methods of data-driven analysis, including ICA and Bayesian networks. We collaborate closely with MIND Research Network partners at Sandia and Los Alamos National Laboratories, the University of New Mexico, Harvard/MIT/ Massachusetts General Hospital and the University of Minnesota.

For more information about the MIND Institute, as well as a complete description of the opportunities available, please visit our website at:  
[www.themindinstitute.org](http://www.themindinstitute.org)

The MIND Institute is a 501(c)3 independent, non-profit organization and is an equal opportunity employer.

## Partner with a Magnet Hospital in Wausau, Wisconsin

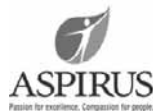

BC/BE Adult Psychiatrist needed for 50/50 Inpatient and Outpatient. Call shared with 6 local psychiatrists including a Medical Director of 11 bed inpatient unit at Aspirus Wausau Hospital. Work with a great team of young vibrant psychiatrists. There is a great potential for program growth and development with a focus on expanded community action. Excellent compensation package with outstanding benefits.

4 seasons of family fun await you. In your backyard you will find fishing, hunting, water sports and much more. For the indoor type we offer shopping, art museum, visual arts center and music conservatory, just to name a few.

Please contact Jamie Sitko today at 800-792-8728 or fax cv to 715-847-2317.  
Email: [jamiiesi@aspirus.org](mailto:jamiiesi@aspirus.org) or visit [www.aspirus.org](http://www.aspirus.org).

## Boston Area Psychiatrist Reviewer – Consultant

Come join a well-established and outstanding group of psychiatrists providing utilization management and case consultation in the Medical Innovation and Leadership division of Blue Cross Blue Shield of Massachusetts. Our model of utilization management is one of collegial, respectful and consultative interactions with psychiatrists, psychologists, social workers and other providers for promoting the efficient use of evidence-based practices.

Blue Cross Blue Shield of Massachusetts is a highly successful HMO with a commitment to placing our members' health first. With our coverage reaching over 3 million members and an increasing behavioral health concentration, we are seeking several physician reviewers to work part-time. We offer flexible hours and will consider individuals with post-training clinical experience and Board Certification in general psychiatry. Additional expertise and certification in addictions and or child/adolescent psychiatry are desired for at least some of the positions.

Interested parties are encouraged to apply on our website at [www.bluecrossma.com/careers](http://www.bluecrossma.com/careers) or contact Carolyn Mustin at [carolyn.mustin@bcbsma.com](mailto:carolyn.mustin@bcbsma.com).

*Our commitment to building a diverse workplace is without question. We are an Equal Opportunity Employer.*

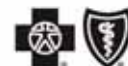

**MASSACHUSETTS**  
Blue Cross Blue Shield of Massachusetts is an Equal Opportunity Employer.

**WORKING TOGETHER.  
MAKING A DIFFERENCE.**

Iowa Health Physicians, the state's largest physician group, is searching for a **BE/BC Adult Psychiatrist** to join a highly respected group in Des Moines, IA.

**Practice Highlights**

- Located on the campus of Iowa Lutheran Hospital, the largest private hospital-based mental health facility in the state.
- Inpatient and outpatient responsibilities.
- A growing community, in need of an additional Psychiatrist.
- Teaching opportunities available.
- Call schedule 1:4.

**Organization Description**

- Iowa Health Physicians is a non-profit 250-member physician group.
- We pride ourselves on providing the highest quality patient care with innovative ways of approaching the health care delivery system.
- Highly competitive salary and compensation plan.

For more information please contact: Jessica Meisner at (888) 343-4912. To expedite consideration, please email your CV to [meisnejj@ihs.org](mailto:meisnejj@ihs.org) or fax to (319) 739-2750.

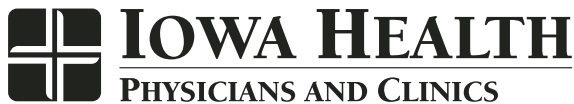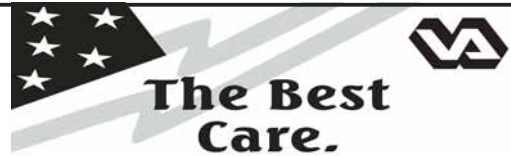

**Chief, Mental Health & Behavioral Sciences Service**

The Veterans Affairs Medical Center in Louisville, Kentucky, in conjunction with the Department of Psychiatry at the University of Louisville (UofL), is seeking a candidate for the full-time position of Chief, Mental Health & Behavioral Sciences Service (MH&BSS). Acceptable candidates include physicians, psychologists, registered nurses, and social workers.

The Louisville VAMC is a major affiliate of the UofL School of Medicine with fully integrated medical student, residency, and fellowship programs. The VAMC offers a full spectrum of comprehensive health care services including medical, surgical, mental health, emergency care, and primary care. The Louisville MH&BSS has a nationally recognized treatment model including community based outpatient treatment, inpatient treatment, ER, and consultation-liaison. MH&BSS is a major teaching site for UofL psychiatry residents and medical student education program, in addition to psychology, nursing, and social work student training. In addition, the MH&BSS plays an active role in the UofL's Department of Psychiatry research program. Louisville has a metropolitan population of nearly 1,000,000. The city boasts a low cost of living, outstanding cultural activities, annual Kentucky Derby Festival events, and ready access to exciting outdoor activities.

The responsibilities of the Chief of MH&BSS include oversight of a large and active clinical service, a substantial training and education program in psychiatry and other mental health disciplines, and a growing research mission. Programs include Health Care for Homeless Veterans, Community Residence Care, Compensated Work Therapy, Mental Health Intensive Case Management, and Substance Abuse Residential Rehabilitation Treatment. Physician candidates must be board certified in psychiatry and should qualify for an appointment as an Associate Professor or Professor at the UofL. Psychologists must have a doctoral degree in psychology from a graduate program in psychology accredited by the American Psychological Association (APA). The specialty area of the degree must be consistent with the assignment for which the applicant is to be employed; and have successfully completed a professional psychology internship training program that has been accredited by APA. Registered nurses must have a Masters of Science in Nursing from a NLN accredited School of Nursing or a BSN with a Master's Degree in a related field. Social Workers must have a Masters Degree in Social Work from a school of Social Work accredited by the Council on Social Work Education. Candidates with a doctoral degree should qualify for an appointment as an Associate Professor or Professor at the UofL.

Candidates must possess administrative leadership and management skills in Mental Health and in the areas of quality improvement, budget, department operations, and supervision of personnel in a wide variety of occupations. Salary and rank are commensurate with experience. Moving expenses are authorized. The Department of Veterans Affairs is an equal opportunity employer. Interested candidates should send C.V. and cover letter, to be received, or if mailed, postmarked, not later than *April 30, 2007*, to **Kimberly Suiter, HRMS (05L); VA Medical Center; 800 Zorn Avenue; Louisville, KY 40206-1499; Telephone (502) 287-5870; Fax (502) 287-6142; E-mail: [kimberly.suiter@va.gov](mailto:kimberly.suiter@va.gov)**.

*Discover Vacationland  
and Join  
the Professionals at*

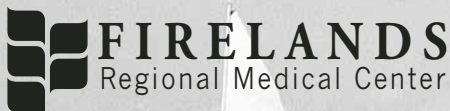

**Sandusky, Ohio**

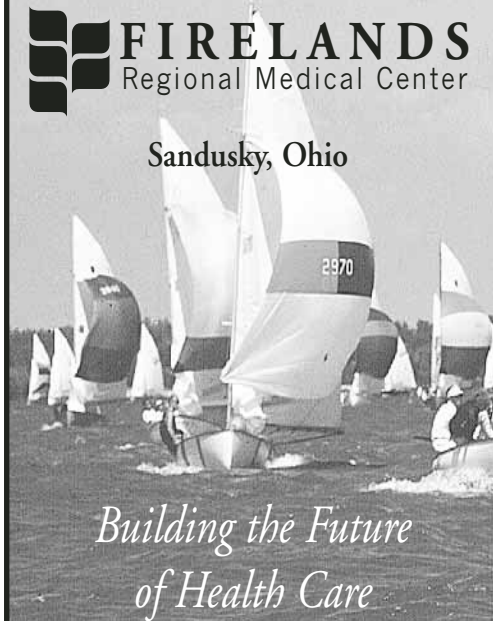

*Building the Future  
of Health Care*

Firelands Regional Medical Center invites you to become a member of one of the most progressive healthcare teams in the Heart of Vacationland.

Firelands is a 440-bed acute care medical center serving a population of over 250,000 in a six county area.

**PSYCHIATRIST WANTED.**

*Join an active and successful practice.*

A \$150 million building project is underway to expand the medical center's patient capacity and cancer treatment/care.

Sandusky, located on the southern shore of Lake Erie, is one hour west of Cleveland. The area is famous for its recreational facilities, which include beautiful city and state parks, fishing piers, beaches, Cedar Point Amusement Park and boating facilities. Our North Coast region is also rich in both cultural activities and educational opportunities.

For more information, call Dru Meredith, Physician Recruiter at 419-557-7885, or e-mail resume to [meredid@firelands.com](mailto:meredid@firelands.com), fax 419-557-7235.

# Index to Advertisers

## April 2007

The publication of an advertisement in this journal does not imply endorsement of the product or service by the American Psychiatric Association.

|                                             |                 |
|---------------------------------------------|-----------------|
| Bristol-Myers Squibb Company                |                 |
| Abilify .....                               | A41-A46         |
| Eli Lilly and Company                       |                 |
| Cymbalta .....                              | A6-A8           |
| Zyprexa.....                                | A51-A56         |
| Employment Opportunities .....              | A59-A64         |
| Forest Laboratories, Inc.                   |                 |
| Lexapro .....                               | A25-A26         |
| Janssen Pharmaceutica                       |                 |
| Invega .....                                | A17-A22         |
| LifeTrack .....                             | A23             |
| McNeil-PPC, Inc.                            |                 |
| Concerta .....                              | A15-A16         |
| Osler Institute .....                       | A23, A56        |
| Symposia                                    |                 |
| A2, A23, A30-A32, A39, A47, A49, A57        |                 |
| Takeda Pharmaceuticals                      |                 |
| Rozerem.....                                | A13-A14         |
| U.S. Pharmaceuticals, Pfizer, Inc.          |                 |
| Corporate.....                              | A9-A10, A27-A28 |
| Geodon .....                                | A33-A36         |
| Geodon IM .....                             | C2-A1           |
| University of Pittsburgh School of Medicine |                 |
| .....                                       | A29             |
| Wyeth Pharmaceuticals, Inc.                 |                 |
| Effexor XR .....                            | A66-C4          |

### Subscription and Business Information

The American Journal of Psychiatry, ISSN 0002-953X, is published monthly by the American Psychiatric Association, 1000 Wilson Blvd., Suite 1825, Arlington, VA 22209-3901. Subscriptions (per year): individual \$205.00, international \$308.00. For additional subscription options, including single issues and student rates, please contact Customer Service at 1-800-368-5777 or email [appi@psych.org](mailto:appi@psych.org). Institutional subscriptions are tier priced. For institutional site license or pricing information, contact Customer Service or visit <http://highwire.stanford.edu/tfocis/>.

Business communications, address changes, and subscription questions from APA members should be directed to the Division of Member Services: (888) 35-PSYCH (toll-free). Nonmember subscribers should call the Circulation Department (800) 368-5777. Author inquiries should be directed to the Journal editorial office: (703) 907-7885 or (703) 907-7884; fax (703) 907-1096; e-mail [ajp@psych.org](mailto:ajp@psych.org).

Business Management: Nancy Frey, Director, Publishing Services; Laura G. Abedi, Associate Director, Production; Brian Skepton, Advertising Sales and Marketing Manager, Nonpharmaceutical and Online Sales; Alison Jones, Advertising Prepress Manager; Robert Pursell, Director, Sales and Marketing.

Director, Advertising Sales: Raymond J. Purkis, Director, 2444 Morris Avenue, Union, NJ 07083; (908) 964-3100.

Pages are produced using Adobe FrameMaker+ SGML 6.0 Printed by Cadmus Communications, Richmond, Va., on acid-free paper effective with Volume 140, Number 5, May 1983.

Periodicals postage paid at Arlington, VA, and additional mailing offices. POSTMASTER: Send address changes to The American Journal of Psychiatry, Circulation Department, American Psychiatric Association, 1000 Wilson Blvd., Suite 1825, Arlington, VA 22209-3901.

Indexed in Abstracts for Social Workers, Academic Abstracts, Biological Abstracts, Chemical Abstracts, Chicago Psychoanalytic Literature Index, Cumulative Index to Nursing Literature, Excerpta Medica, Hospital Literature Index, Index Medicus, International Nursing Index, Nutrition Abstracts, Psychological Abstracts, Science Citation Index, Social Science Source, and Social Sciences Index.

The American Psychiatric Association does not hold itself responsible for statements made in its publications by contributors or advertisers. Unless so stated, material in The American Journal of Psychiatry does not reflect the endorsement, official attitude, or position of the American Psychiatric Association or of the Journal's Editorial Board.

Authorization to photocopy items for internal or personal use, or the internal or personal use of specific clients, is granted by the American Psychiatric Association for libraries and other users registered with the Copyright Clearance Center (CCC) Transactional Reporting Service, provided that the base fee of \$15.00 per copy is paid directly to CCC, 222 Rosewood Drive, Danvers, MA 01923; (978) 750-8400 (tel), (978) 646-8600 (fax), [www.copyright.com](http://www.copyright.com) (web site). 0002-953X/05/\$15.00.

This consent does not extend to other kinds of copying, such as copying for general distribution, for advertising or promotional purposes, for creating new collective works, or for resale. Requests for commercial distribution should be directed to (703) 907-7894. APA does not require that permission be obtained for the photocopying of isolated articles for nonprofit classroom or library reserve use; all fees associated with such permission are waived.

Copyright © 2005 American Psychiatric Association.

**BRIEF SUMMARY.** See package insert for full prescribing information.

**Suicidality in Children and Adolescents**

Antidepressants increased the risk of suicidal thinking and behavior (suicidality) in short-term studies in children and adolescents with Major Depressive Disorder (MDD) and other psychiatric disorders. Anyone considering the use of EFFEXOR XR or any other antidepressant in a child or adolescent must balance this risk with the clinical need. Patients who are started on therapy should be observed closely for clinical worsening, suicidality, or unusual changes in behavior. Families and caregivers should be advised of the need for close observation and communication with the prescriber. EFFEXOR XR is not approved for use in pediatric patients. (See Warnings and Precautions: Pediatric Use.)

Pooled analyses of short-term (4 to 16 weeks) placebo-controlled trials of 9 antidepressant drugs (SSRIs and others) in children and adolescents with Major Depressive Disorder (MDD), obsessive-compulsive disorder (OCD), or other psychiatric disorders (a total of 24 trials involving over 4,400 patients) have revealed a greater risk of adverse events representing suicidal thinking or behavior (suicidality) during the first few months of treatment in those receiving antidepressants. The average risk of such events in patients receiving antidepressants was 4%, twice the placebo risk of 2%. No suicides occurred in these trials.

**CONTRAINDICATIONS:** Hypersensitivity to venlafaxine hydrochloride or to any excipients in the formulation. Concomitant use in patients taking monoamine oxidase inhibitors (MAOIs). **WARNINGS: Clinical Worsening and Suicide Risk—**Patients with major depressive disorder (MDD), both adult and pediatric, may experience worsening of their depression and/or the emergence of suicidal ideation and behavior (suicidality) or unusual changes in behavior, whether or not they are taking antidepressant medications, and this risk may persist until significant remission occurs. There has been a long-standing concern that antidepressants may have a role in inducing worsening of depression and the emergence of suicidality in certain patients. Antidepressants increased the risk of suicidal thinking and behavior (suicidality) in short-term studies in children and adolescents with MDD and other psychiatric disorders. It is unknown whether the suicidality risk in pediatric patients extends to longer-term use, i.e., beyond several months. It is also unknown whether the suicidality risk extends to adults. All pediatric patients being treated with antidepressants for any indication should be observed closely for clinical worsening, suicidality, and unusual changes in behavior, especially during the initial few months of a course of drug therapy, or at times of dose changes, either increases or decreases. Adults with MDD or comorbid depression in the setting of other psychiatric illness being treated with antidepressants should be observed similarly for clinical worsening and suicidality, especially during the initial few months of a course of drug therapy, or at times of dose changes, either increases or decreases. Anxiety, agitation, panic attacks, insomnia, irritability, hostility, aggressiveness, impulsivity, akathisia (psychomotor restlessness), hypomania, and mania have been reported in adult and pediatric patients being treated with antidepressants for MDD and other indications, both psychiatric and nonpsychiatric. Although a causal link between the emergence of such symptoms and either the worsening of depression and/or the emergence of suicidal impulses has not been established, there is concern that such symptoms may represent precursors to emerging suicidality. Consideration should be given to changing the therapeutic regimen, including possibly discontinuing the medication, in patients whose depression is persistently worse, or who are experiencing emergent suicidality or symptoms that might be precursors to worsening depression or suicidality, especially if these symptoms are severe, abrupt in onset, or were not part of the patient's presenting symptoms. If the decision has been made to discontinue treatment, medication should be tapered, as rapidly as is feasible, but with recognition that abrupt discontinuation can be associated with certain symptoms (see PRECAUTIONS and DOSAGE AND ADMINISTRATION). Families and caregivers of pediatric patients being treated with antidepressants for MDD or other indications, both psychiatric and nonpsychiatric, should be alerted about the need to monitor patients for the emergence of agitation, irritability, unusual changes in behavior, and the other symptoms described above, as well as the emergence of suicidality, and to report such symptoms immediately to health care providers. Such monitoring should include daily observation by families and caregivers. Prescriptions for Effexor XR should be written for the smallest quantity of capsules consistent with good patient management, in order to reduce the risk of overdose. Families and caregivers of adults being treated for depression should be similarly advised. **Screening Patients for Bipolar Disorder:** A major depressive episode may be the initial presentation of bipolar disorder. It is generally believed that treating such an episode with an antidepressant alone may increase the likelihood of precipitation of a mixed/manic episode in patients at risk for bipolar disorder. Whether any of the symptoms described above represents such a conversion is unknown. Prior to initiating antidepressant treatment, patients with depressive symptoms should be screened to determine if they are at risk for bipolar disorder; such screening should include a detailed psychiatric history, including a family history of suicide, bipolar disorder, and depression. Effexor XR is not approved for use in treating bipolar depression. **Potential for Interaction with MAOIs—Adverse reactions, some serious, have been reported in patients who recently discontinued an MAOI and started on venlafaxine, or who recently discontinued venlafaxine prior to initiation of an MAOI. These reactions included tremor, myoclonus, diaphoresis, nausea, vomiting, flushing, dizziness, hyperthermia with features resembling neuroleptic malignant syndrome, seizures, and death. Effexor XR should not be used in combination with an MAOI, or within at least 14 days of discontinuing treatment with an MAOI. At least 7 days should be allowed after stopping venlafaxine before starting an MAOI. Serotonin Syndrome—**The development of potentially life-threatening serotonin syndrome may occur with Effexor XR treatment, particularly with (i) concomitant use of serotonergic drugs and (ii) with drugs that impair metabolism of serotonin (see CONTRAINDICATIONS—MAOIs). If concomitant treatment of Effexor XR with an SSRI, SNRI, or a 5-hydroxytryptamine receptor agonist (triptan) is clinically warranted, careful observation of the patient is advised, particularly during treatment initiation and dose increases. The concomitant use of Effexor XR with serotonergic precursors (such as tryptophan supplements) is not recommended. **Sustained Hypertension—**Venlafaxine is associated with sustained increases in blood pressure (BP) in some patients. Postmarketing cases of elevated BP requiring immediate treatment have been reported. Pre-existing hypertension should be controlled. Regular monitoring of BP is recommended. For patients experiencing sustained increase in BP, consider either dose reduction or discontinuation. **Mydriasis—**Mydriasis has been reported; monitor patients with raised intraocular pressure or at risk of acute narrow-angle glaucoma (angle-closure glaucoma). **PRECAUTIONS: General—Discontinuation of Treatment with Effexor XR.** Abrupt discontinuation or dose reduction of venlafaxine at various doses is associated with new symptoms, the frequency of which increased with increased dose level and longer duration of treatment. Symptoms include agitation, anorexia, anxiety, confusion, coordination impaired, diarrhea, dizziness, dry mouth, dysphoric mood, emotional lability, fasciculation, fatigue, headaches, hypomania, insomnia, irritability, lethargy, nausea, nervousness, nightmares, seizures, sensory disturbances (e.g., paresthesias such as electric shock sensations), somnolence, sweating, tinnitus, tremor, vertigo, and vomiting. Monitor patients when discontinuing treatment. A gradual reduction in the dose rather than abrupt cessation is recommended. If intolerable symptoms occur following a decrease in the dose or upon discontinuation of treatment, consider resuming the previously prescribed dose. Subsequently, continue decreasing the dose at a more gradual rate. **Insomnia and Nervousness:** Treatment-emergent insomnia and nervousness have been reported. In Phase 3 trials, insomnia led to drug discontinuation in 1% of both depressed patients and Panic Disorder (PD) patients and in 3% of both Generalized Anxiety Disorder (GAD) and Social Anxiety Disorder (SAD) patients. Nervousness led to drug discontinuation in 0.9% of depressed patients, in 2% of GAD patients, and in 0% of SAD and PD patients. **Changes in Weight: Adult Patients.** In short-term MDD trials, 7% of Effexor XR patients had  $\geq 5\%$  loss of body weight and 0.1% discontinued for weight loss. In 6-month GAD studies, 3% of Effexor XR patients had  $\geq 7\%$  loss of body weight, and 0.3% discontinued for weight loss in 8-week studies. In 12-week SAD trials, 3% of Effexor XR patients had  $\geq 7\%$  loss of body weight and no patients discontinued for weight loss. In 12-week PD trials, 3% of Effexor XR patients had  $\geq 7\%$  loss of body weight, and no patients discontinued for weight loss. The safety and efficacy of venlafaxine in combination with weight loss agents, including phentermine, have not been established. Coadministration of Effexor XR and weight loss agents is not recommended. Effexor XR is not indicated for weight loss alone or in combination with other products. **Pediatric Patients:** Weight loss was seen in patients aged 6-17 receiving Effexor XR. More Effexor XR patients than placebo patients experienced weight loss of at least 3.5% in both MDD and GAD studies (18% of Effexor XR patients vs. 3.6% of placebo patients;  $P < 0.001$ ) and the SAD study (47% of Effexor XR patients vs. 14% of placebo patients;  $P < 0.001$ ). Weight loss was not limited to patients with treatment-emergent anorexia (decreased appetite). Children and adolescents in a 6-month MDD study had increases in weight less than expected based on data from age- and sex-matched peers. The difference between observed and expected weight gain was larger for children <12 years old than for adolescents  $\geq 12$  years old. **Changes in Height: Pediatric Patients:** In 8-week GAD studies, Effexor XR patients aged 6-17 grew an average of 0.3 cm ( $n=122$ ), while placebo patients grew an average of 1.0 cm ( $n=132$ ;  $P < 0.041$ ). This difference in height increase was most notable in patients <12. In 8-week MDD studies, Effexor XR patients grew an average of 0.8 cm ( $n=146$ ), while placebo patients grew an average of 0.7 cm ( $n=147$ ). During the 16-week, placebo-controlled SAD study, both the Effexor XR ( $n=109$ ) and the placebo ( $n=112$ ) patients grew an average of 1.0 cm. In the 6-month MDD study, children and adolescents had height increases less than expected based on data from age- and sex-matched peers. The difference between observed and expected growth rates was larger for children <12 years old than for adolescents  $\geq 12$  years old. **Changes in Appetite: Adult Patients:** Treatment-emergent anorexia was more commonly reported for Effexor XR (8%) than placebo (4%) patients in MDD

studies. The discontinuation rate for anorexia was 1.0% in MDD studies. Treatment-emergent anorexia was more commonly reported for Effexor XR (8%) than placebo (2%) patients in GAD studies. The discontinuation rate for anorexia was 0.9% for up to 8 weeks in GAD studies. Treatment-emergent anorexia was more commonly reported for Effexor XR (20%) than placebo (2%) patients in SAD studies. The discontinuation rate for anorexia was 0.4% for up to 12 weeks in SAD studies. Treatment-emergent anorexia was more commonly reported for Effexor XR (8%) than placebo (3%) patients in PD studies. The discontinuation rate for anorexia was 0.4% for Effexor XR patients in 12-week PD studies. **Pediatric Patients:** Decreased appetite was seen in pediatric patients receiving Effexor XR. In GAD and MDD trials, 10% of Effexor XR patients aged 6-17 for up to 8 weeks and 3% of placebo patients had treatment-emergent anorexia. None of the patients receiving Effexor XR discontinued for anorexia or weight loss. In the placebo-controlled trial for SAD, 22% and 3% of patients aged 8-17 treated for up to 16 weeks with Effexor XR and placebo, respectively, reported treatment-emergent anorexia (decreased appetite). The discontinuation rates for anorexia were 0.7% and 0.0% for patients receiving Effexor XR and placebo, respectively; the discontinuation rates for weight loss were 0.7% for patients receiving either Effexor XR or placebo. **Activation of Mania/Hypomania:** Mania or hypomania has occurred during short-term depression and PD studies. As with all drugs effective in the treatment of MDD, Effexor XR should be used cautiously in patients with a history of mania. **Hyponatremia:** Hyponatremia and/or the syndrome of inappropriate antidiuretic hormone secretion (SIADH) may occur with venlafaxine. Consider this in patients who are volume-depleted, elderly, or taking diuretics. **Seizures:** In all premarketing depression trials with Effexor, seizures were reported in 0.3% of venlafaxine patients. Use cautiously in patients with a history of seizures. Discontinue in any patient who develops seizures. **Abnormal Bleeding:** Abnormal bleeding (most commonly ecchymosis) has been reported. **Serum Cholesterol Elevation:** Clinically relevant increases in serum cholesterol were seen in 5.3% of venlafaxine patients and 0.0% of placebo patients treated for at least 3 months in trials. Consider measurement of serum cholesterol levels during long-term treatment. **Use in Patients With Concomitant Illness:** Use Effexor XR cautiously in patients with diseases or conditions that could affect hemodynamic responses or metabolism. Venlafaxine has not been evaluated in patients with recent history of MI or unstable heart disease. Increases in QT interval (QTc) have been reported in clinical studies. Exercise caution in patients whose underlying medical conditions might be compromised by increases in heart rate. In patients with renal impairment or cirrhosis of the liver, the clearances of venlafaxine and its active metabolites were decreased, prolonging the elimination half-lives. A lower dose may be necessary; use with caution in such patients. **Information for Patients—**Prescribers or other health professionals should inform patients, their families, and their caregivers about the benefits and risks associated with treatment with Effexor XR and should counsel them in its appropriate use. A patient Medication Guide About Using Antidepressants in Children and Teenagers is available for Effexor XR. The prescriber or health professional should instruct patients, their families, and their caregivers to read the Medication Guide and should assist them in understanding its contents. Patients should be given the opportunity to discuss the contents of the Medication Guide and to effect answers to any questions they may have. The complete text of the Medication Guide is available at [www.foxor.com](http://www.foxor.com) or in the approved prescribing information. Patients should be advised of the following issues and asked to alert their prescriber if these occur while taking Effexor XR. **Clinical Worsening and Suicide Risk:** Patients, their families, and their caregivers should be encouraged to be alert to the emergence of symptoms listed in **WARNINGS: Clinical Worsening and Suicide Risk**, especially those seen early during antidepressant treatment and when the dose is adjusted up or down. Families and caregivers of patients should be advised to observe for the emergence of such symptoms on a day-to-day basis, since changes may be abrupt. Such symptoms should be reported to the patient's prescriber or health professional, especially if they are severe, abrupt in onset, or were not part of the patient's presenting symptoms. Symptoms such as these may be associated with an increased risk for suicidal thinking and behavior and indicate a need for very close monitoring and possibly changes in the medication. Caution patients 1) about operating hazardous machinery, including automobiles, until they are reasonably sure that venlafaxine does not adversely affect their abilities; 2) to avoid alcohol while taking Effexor XR; and 3) about the risk of serotonin syndrome with the concomitant use of Effexor XR and triptans, tramadol, tryptophan supplements, or other serotonergic agents. Patients should be advised to notify their physician 1) if they become pregnant or intend to become pregnant during therapy, or if they are nursing; 2) about other prescription or over-the-counter drugs, including herbal preparations and nutritional supplements they are taking or plan to take; 3) if they develop a rash, hives, or related allergic phenomena; or 4) if they have a history of glaucoma or increased intraocular pressure. **Laboratory Tests—**No specific laboratory tests are recommended. **Drug Interactions—Alcohol:** A single dose of ethanol had no effect on the pharmacokinetics (PK) of venlafaxine or O-desmethylvenlafaxine (ODV), and venlafaxine did not exaggerate the psychomotor and psychometric effects induced by ethanol. **Cimetidine:** Use caution when administering venlafaxine with cimetidine to patients with pre-existing hypertension or hepatic dysfunction, and the elderly. **Diazepam:** A single dose of diazepam did not appear to affect the PK of either venlafaxine or ODV. Venlafaxine did not have any effect on the PK of diazepam or its active metabolite, desmethyldiazepam, or affect the psychomotor and psychometric effects induced by diazepam. **Haloperidol:** Venlafaxine decreased total oral-dose clearance of haloperidol, resulting in a 70% increase in haloperidol AUC. The haloperidol  $C_{max}$  increased 88%, but the haloperidol elimination half-life was unchanged. **Lithium:** A single dose of lithium did not appear to affect the PK of either venlafaxine or ODV. Venlafaxine had no effect on the PK of lithium. **Drugs Highly Bound to Plasma Proteins:** Venlafaxine is not highly bound to plasma proteins; coadministration of Effexor XR with a highly protein-bound drug should not cause increased free concentrations of the other drug. **Drugs That Inhibit Cytochrome P450 Isoenzymes:** CYP2D6 Inhibitors: Venlafaxine is metabolized to its active metabolite, ODV, by CYP2D6. Drugs inhibiting this isoenzyme have the potential to increase plasma concentrations of venlafaxine and decrease concentrations of ODV. No dosage adjustment is required when venlafaxine is coadministered with a CYP2D6 inhibitor. Concomitant use of venlafaxine with drug treatment(s) that potentially inhibits both CYP2D6 and CYP3A4, the primary metabolizing enzymes for venlafaxine, has not been studied. Use caution if therapy includes venlafaxine and any agent(s) that produces simultaneous inhibition of these two enzyme systems. **Drugs Metabolized by Cytochrome P450 Isoenzymes:** Venlafaxine is a relatively weak inhibitor of CYP2D6. Venlafaxine did not inhibit CYP1A2 and CYP3A4, CYP2C9 (in vitro), or CYP2C19. **Imipramine:** Venlafaxine did not affect the PK of imipramine and 2-OH-imipramine. However, desipramine AUC,  $C_{max}$  and  $C_{min}$  increased by ~35% in the presence of venlafaxine. The 2-OH-desipramine AUCs increased by 2.5-4.5 fold. Imipramine did not affect the PK of venlafaxine and ODV. **Risperidone:** Venlafaxine slightly inhibited the CYP2D6-mediated metabolism of risperidone to its active metabolite, 9-hydroxyrisperidone, resulting in a ~32% increase in risperidone AUC. Venlafaxine coadministration did not significantly alter the PK profile of the total active moiety (risperidone plus 9-hydroxyrisperidone). **CYP3A4:** Venlafaxine did not inhibit CYP3A4 in vitro and in vivo. **Indinavir:** In a study of 9 healthy volunteers, venlafaxine administration resulted in a 28% decrease in the AUC of a single dose of indinavir and a 36% decrease in indinavir  $C_{max}$ . Indinavir did not affect the PK of venlafaxine and ODV. **CYP1A2:** Venlafaxine did not inhibit CYP1A2 in vitro and in vivo. **CYP2C9:** Venlafaxine did not inhibit CYP2C9 in vitro. In vivo, venlafaxine 75 mg by mouth every 12 hours did not alter the PK of a single 550-mg dose of tolbutamide or the CYP2C9-mediated formation of 4-hydroxy-tolbutamide. **CYP2C19:** Venlafaxine did not inhibit the metabolism of diazepam, which is partially metabolized by CYP2C19 (see Diazepam above). **MAOIs:** See CONTRAINDICATIONS and WARNINGS. **CNS-Active Drugs:** Use caution with concomitant use of venlafaxine and other CNS-active drugs. **Serotonergic Drugs and Triptans (see WARNINGS: Serotonin Syndrome):** Based on the mechanism of action of Effexor XR and the potential for serotonin syndrome, caution is advised when Effexor XR is coadministered with other drugs that may affect the serotonergic neurotransmitter systems, such as triptans, SSRIs, other SNRIs, lisdexedrine, tramadol, or St. John's wort. If concomitant treatment of Effexor XR with these drugs is clinically warranted, careful observation of the patient is advised, particularly during treatment initiation and dose increases. The concomitant use of Effexor XR with tryptophan supplements is not recommended. **Electroconvulsive Therapy (ECT):** There are no clinical data establishing the benefit of ECT combined with Effexor XR treatment. **Carcinogenesis, Mutagenesis, Impairment of Fertility—Carcinogenesis:** There was no increase in tumors in mice and rats given up to 1.7 times the maximum recommended human dose (MRHD) on a mg/m<sup>2</sup> basis. **Mutagenesis:** Venlafaxine and ODV were not mutagenic in the Ames reverse mutation assay in *Salmonella* bacteria or the CHO/HGPRT mammalian cell forward gene mutation assay. Venlafaxine was not clastogenic in several assays. ODV elicited a clastogenic response in the in vivo chromosomal aberration assay in rat bone marrow. **Impairment of Fertility:** No effects on reproduction or fertility in rats were noted at oral doses of up to 2 times the MRHD on a mg/m<sup>2</sup> basis. **Pregnancy—Teratogenic Effects—Pregnancy Category C.** Reproduction studies in rats given 2.5 times, and rabbits given 4 times the MRHD (mg/m<sup>2</sup> basis) revealed no malformations in offspring. However, in rats given 2.5 times the MRHD, there was a decrease in pup weight, an increase in stillborn pups, and an increase in pup deaths during the first 5 days of lactation when dosing began during pregnancy and continued until weaning. There are no adequate and well-controlled studies in pregnant women; use Effexor XR during pregnancy only if clearly needed. **Nonteratogenic Effects:** Neonates exposed to Effexor XR late in the third trimester have developed complications requiring prolonged hospitalization, respiratory support, and tube feeding. Complications can arise immediately upon delivery. Reports include respiratory distress, cyanosis, apnea, seizures, temperature instability, feeding difficulty, vomiting, hypoglycemia, hypotonia, hyperreflexia, tremor, jitteriness, irritability, and constant crying. This is consistent with a direct toxic effect of SNRIs or a drug discontinuation syndrome. In some cases, it is consistent with serotonin syndrome. When treating a pregnant woman with Effexor XR during the third trimester, carefully consider the potential risks and benefits of treatment and consider tapering Effexor XR in the third trimester. **Labor, Delivery, Nursing—**The effect on labor and delivery in humans is unknown. Venlafaxine and ODV have been reported to be excreted in human milk. Because of the potential for serious adverse reactions in nursing infants from Effexor XR, a decision should be made whether to discontinue nursing or to discontinue the drug, taking into account the importance of the drug to the mother. **Pediatric Use—**Safety and effectiveness in the pediatric population have not been established (see BOX WARNING and WARNINGS: Clinical Worsening and Suicide Risk). No studies have adequately assessed the impact of Effexor XR on growth, development, and maturation of children and adolescents. Studies suggest Effexor XR may adversely affect weight and height (see PRECAUTIONS-General, Changes in Height and Changes in Weight). Should the decision be made to treat a pediatric patient with Effexor XR, regular monitoring of weight and height is recommended during treatment, particularly if long term. The safety of Effexor XR for pediatric patients has not been assessed for chronic treatment >6 months. In studies in patients aged 6-17, blood pressure and cholesterol increases considered to be clinically relevant

were similar to that observed in adult patients. The precautions for adults apply to pediatric patients. **Geriatric Use**—No overall differences in effectiveness or safety were observed between geriatric and younger patients. Greater sensitivity of some older individuals cannot be ruled out. Hyponatremia and SIADH have been reported, usually in the elderly. **ADVERSE REACTIONS: Associated with Discontinuation of Treatment**—The most common events leading to discontinuation in MDD, GAD, SAD, and PD trials included nausea, anorexia, anxiety, impotence, dry mouth, dizziness, insomnia, somnolence, hypertension, diarrhea, paresthesia, tremor, abnormal (mostly blurred) vision, abnormal (mostly delayed) ejaculation, asthenia, vomiting, nervousness, headache, vasodilatation, thinking abnormal, decreased libido, and sweating. **Commonly Observed Adverse Events in Controlled Clinical Trials for MDD, GAD, SAD, and PD—Body as a Whole**: asthenia, headache, flu syndrome, accidental injury, abdominal pain. **Cardiovascular**: vasodilatation, hypertension, palpitation. **Digestive**: nausea, constipation, anorexia, vomiting, flatulence, diarrhea, eructation. **Metabolic/Nutritional**: weight loss. **Nervous System**: dizziness, somnolence, insomnia, dry mouth, nervousness, abnormal dreams, tremor, depression, hypertonia, paresthesia, libido decreased, agitation, anxiety, twitching. **Respiratory System**: pharyngitis, yawning, sinusitis. **Skin**: sweating. **Special Senses**: abnormal vision. **Urogenital System**: abnormal ejaculation, impotence, orgasmic dysfunction (including anorgasmia) in females. **Vital Sign Changes**: Effexor XR was associated with a mean increase in pulse rate of about 2 beats/min in depression and GAD trials and a mean increase in pulse rate of 4 beats/min in SAD trials. (See **WARNINGS-Sustained Hypertension**). **Laboratory Changes**: Clinically relevant increases in serum cholesterol were noted in Effexor XR clinical trials. Increases were duration dependent over the study period and tended to be greater with higher doses. **Other Events Observed During the Premarketing Evaluation of Effexor and Effexor XR**—N=6,670. "Frequent"—events occurring in at least 1/100 patients; "infrequent"—1/100 to 1/1,000 patients; "rare"—fewer than 1/1,000 patients. **Body as a whole** - Frequent: chest pain, substernal, chills, fever, neck pain; Infrequent: face edema, intentional injury, malaise, moniliasis, neck rigidity, pelvic pain, photosensitivity reaction, suicide attempt, withdrawal syndrome; Rare: appendicitis, bacteremia, carcinoma, cellulitis. **Cardiovascular system** - Frequent: migraine, postural hypotension, tachycardia; Infrequent: angina pectoris, arrhythmia, extrasystoles, hypotension, peripheral vascular disorder (mainly cold feet and/or cold hands), syncope, thrombophlebitis; Rare: aortic aneurysm, arteritis, first-degree atrioventricular block, bigeminy, bundle branch block, capillary fragility, cerebral ischemia, coronary artery disease, congestive heart failure, heart arrest, hematoma, cardiovascular disorder (mitral valve and circulatory disturbance), mucocutaneous hemorrhage, myocardial infarct, palp, sinus arrhythmia. **Digestive system** - Frequent: increased appetite; Infrequent: bruxism, colitis, dysphagia, tongue edema, esophagitis, gastritis, gastroenteritis, gastrointestinal ulcer, gingivitis, glossitis, rectal hemorrhage, hemorrhoids, melena, oral moniliasis, stomatitis, mouth ulceration; Rare: abdominal distension, biliary pain, chelitis, cholecystitis, cholelithiasis, esophageal spasms, duodenitis, hematemesis, gastroesophageal reflux disease, gastrointestinal hemorrhage, gum hemorrhage, hepatitis, ileitis, jaundice, intestinal obstruction, liver tenderness, parotitis, periodontitis, proctitis, rectal disorder, salivary gland enlargement, increased salivation, soft stools, tongue discoloration. **Endocrine system** - Rare: galactorrhoea, goiter, hyperthyroidism, hypothyroidism, thyroid nodule, thyroiditis. **Hemic and lymphatic system** - Frequent: ecchymosis; Infrequent: anemia, leukocytosis, leukopenia, lymphadenopathy, thrombocytopenia; Rare: basophilia, bleeding time increased, cyanosis, eosinophilia, lymphocytosis, multiple myeloma, purpura, thrombocytopenia. **Metabolic and nutritional** - Frequent: edema, weight gain; Infrequent: alkaline phosphatase increased, dehydration, hypercholesteremia, hyperglycemia, hyperlipemia, hypoglycemia, hypokalemia, SGOT increased, SGPT increased, thirst; Rare: alcohol intolerance, bilirubinemia, BUN increased, creatinine increased, diabetes mellitus, glycosuria, gout, healing abnormal, hyperchromatosis, hypercalciuria, hyperkalemia, hyperphosphatemia, hyperuricemia, hypochlosteremia, hyponatremia, hypophosphatemia, hypoproteinemia, uremia. **Musculoskeletal system** - Frequent: arthralgia; Infrequent: arthritis, arthrosis, bone spurs, bursitis, leg cramps, myasthenia, tenosynovitis; Rare: bone pain, pathological fracture, muscle cramp, muscle spasms, musculoskeletal stiffness, myopathy, osteoporosis, osteosclerosis, plantar fasciitis, rheumatoid arthritis, tendon rupture. **Nervous system** - Frequent: amnesia, confusion, depersonalization, hypesthesia, thinking abnormal, trismus, vertigo; Infrequent: akathisia, apathy, ataxia, circumoral paresthesia, CNS stimulation, emotional lability, euphoria, hallucinations, hostility, hyperesthesia, hyperkinesia, hypotonia, incoordination, manic reaction, myoclonus, neuralgia, neuropathy, psychosis, seizure, abnormal speech, stupor, suicidal ideation; Rare: abnormal/changed behavior, adjustment disorder, akinesia, alcohol abuse, aphasia, bradykinesia, buccoglossal syndrome, cerebrovascular accident, feeling drunk, loss of consciousness, delusions, dementia, dystonia, energy increased, facial paralysis, abnormal gait, Guillian-Barré syndrome, homicidal ideation, hyperchlorhidria, hypokinesia, hysteria, impulse control difficulties, libido increased, motion sickness, neuritis, nystagmus, paranoid reaction, paresis, psychotic depression, reflexes decreased, reflexes increased, torticollis. **Respiratory system** - Frequent: cough increased, dyspnea; Infrequent: asthma, chest congestion, epistaxis, hyperventilation, laryngismus, laryngitis, pneumonia, voice alteration; Rare: atelectasis, hemoptysis, hypoventilation, hypoxia, larynx edema, pleurisy, pulmonary embolism, sleep apnea. **Skin and appendages** - Frequent: pruritus; Infrequent: acne, alopecia, contact dermatitis, dry skin, eczema, maculopapular rash, psoriasis, urticaria; Rare: brittle nails, erythema nodosum, exfoliative dermatitis, lichenoid dermatitis, hair discoloration, skin discoloration, furunculosis, hirsutism, leukoderma, miliaria, petechial rash, pustular rash, pustular rash, vesiculobullous rash, seborrhea, skin atrophy, skin hypertrophy, skin striae, sweating decreased. **Special senses** - Frequent: abnormality of accommodation, mydriasis, taste perversion; Infrequent: conjunctivitis, diplopia, dry eyes, eye pain, hyperacusis, otitis media, parosmia, photophobia, taste loss, visual field defect; Rare: blepharitis, cataract, chromatopsia, conjunctival edema, corneal lesion, deafness, exophthalmos, eye hemorrhage, glaucoma, retinal hemorrhage, subconjunctival hemorrhage, keratitis, labyrinthitis, miosis, papilledema, decreased pupillary reflex, otitis externa, scleritis, uveitis. **Urogenital system** - Frequent: prostatic disorder (prostatitis, enlarged prostate, and prostate irritability), urination impaired; Infrequent: albuminuria, amenorrhea, cystitis, dysuria, hematuria, kidney calculus, kidney pain, leukorrhea, menorrhagia, metrorrhagia, nocturia, breast pain, polyuria, pyuria, urinary incontinence, urinary retention, urinary urgency, vaginal hemorrhage, vaginitis; Rare: abortion, anuria, balanitis, bladder pain, breast discharge, breast engorgement, breast enlargement, endometriosis, female lactation, fibrocystic breast, calcium crystalluria, cervicitis, orchitis, ovarian cyst, prolonged erection, gynecomastia (male), hypomenorrhea, kidney function abnormal, mastitis, menopause, pyelonephritis, oliguria, salpingitis, urolithiasis, uterine hemorrhage, uterine spasm, vaginal dryness. **Postmarketing Reports**: agranulocytosis, anaphylaxis, aplastic anemia, catatonia, congenital anomalies, CPK increased, deep vein thrombophlebitis, delirium, EKG abnormalities such as QT prolongation; cardiac arrhythmias including atrial fibrillation, supraventricular tachycardia, ventricular extrasystoles, and rare reports of ventricular fibrillation and ventricular tachycardia, including torsades de pointes; epidermal necrosis/Stevens-Johnson syndrome, erythema multiforme, extrapyramidal symptoms (including dyskinesia and tardive dyskinesia), angle-closure glaucoma, hemorrhage (including eye and gastrointestinal bleeding), hepatic events (including GGT elevation; abnormalities of unspecified liver function tests; liver damage, necrosis, or failure; and fatty liver), interstitial lung disease (including pulmonary eosinophilia), involuntary movements, LDH increased, neuroleptic malignant syndrome-like events (including a case of a 10-year-old who may have been taking methylphenidate, was treated and recovered), renal anemia, night sweats, pancreatitis, pancytopenia, panic, prolactin increased, renal failure, rhabdomyolysis, serotonin syndrome, shock-like electrical sensations or tinnitus (in some cases, subsequent to the discontinuation of venlafaxine or tapering of dose), and SIADH (usually in the elderly). Elevated clozapine levels that were temporally associated with adverse events, including seizures, have been reported following the addition of venlafaxine. Increases in prothrombin time, partial thromboplastin time, or INR have been reported when venlafaxine was given to patients on warfarin therapy. **DRUG ABUSE AND DEPENDENCE**: Effexor XR is not a controlled substance. Evaluate patients carefully for history of drug abuse and observe such patients closely for signs of misuse or abuse. **OVERDOSAGE**: The most commonly reported events in overdose include tachycardia, changes in level of consciousness (ranging from somnolence to coma), mydriasis, seizures, and vomiting. Electrocardiogram changes (eg, prolongation of QT interval, bundle branch block, QRS prolongation), ventricular tachycardia, bradycardia, hypotension, rhabdomyolysis, vertigo, liver necrosis, serotonin syndrome, and death have been reported. Published retrospective studies report that venlafaxine overdose may be associated with an increased risk of fatal outcomes compared to that observed with SSRI antidepressant products, but lower than that for tricyclic antidepressants. Epidemiological studies have shown that venlafaxine-treated patients have a higher pre-existing burden of suicide risk factors than SSRI-treated patients. The extent to which the finding of an increased risk of fatal outcomes can be attributed to the toxicity of venlafaxine in overdose as opposed to some characteristic(s) of venlafaxine-treated patients is not clear. Treatment should consist of those general measures employed in the management of overdose with any antidepressant. Ensure an adequate airway, oxygenation and ventilation. Monitor cardiac rhythm and vital signs. General supportive and symptomatic measures are also recommended. Induction of emesis is not recommended. Gastric lavage with a large bore orogastric tube with appropriate airway protection, if needed, may be indicated if performed soon after ingestion or in symptomatic patients. Activated charcoal should be administered. Due to the large volume of distribution of this drug, forced diuresis, dialysis, hemoperfusion, and exchange transfusion are unlikely to be of benefit. No specific antidotes for venlafaxine are known. In managing overdose, consider the possibility of multiple drug involvement. Consider contacting a poison control center for additional information on the treatment of overdose. Telephone numbers for certified poison control centers are listed in the Physicians' Desk Reference® (PDR). **DOSE AND ADMINISTRATION**: Consult full prescribing information for dosing instructions. **Switching Patients to or From an MAOI**—At least 14 days should elapse between discontinuation of an MAOI and initiation of therapy with Effexor XR. At least 7 days should be allowed after stopping Effexor XR before starting an MAOI (see **CONTRAINDICATIONS** and **WARNINGS**). This brief summary is based on Effexor XR Prescribing Information W1040C025, revised August 2006.

# Take a closer look at Dialogues Time to Talk™

## Dialogues

is a unique patient support and education program that is designed to help you foster successful therapy

## Dialogues

offers patients access to a call center to speak with a health care provider for patient support and education to reinforce your efforts

## Dialogues

supplies feedback and updates about these patient calls to you, their physician

Encourage your **EFFEXOR XR** patients to enroll in **Dialogues** by calling 866-313-3737 — and you can visit [mddpatientsupport.com](http://mddpatientsupport.com)

- The most common adverse events reported in EFFEXOR XR short-term placebo-controlled depression, generalized anxiety disorder (GAD), social anxiety disorder (SAD), and/or panic disorder (PD) trials (incidence  $\geq 10\%$  and  $\geq 2x$  that of placebo) were anorexia, asthenia, constipation, dizziness, dry mouth, ejaculation problems, impotence, insomnia, nausea, nervousness, somnolence, and sweating.

ONCE-DAILY

VENLAFAXINE HCl

**EFFEXOR XR**® EXTENDED RELEASE CAPSULES

*The change they deserve.*

*Please see brief summary of Prescribing Information on adjacent pages.*



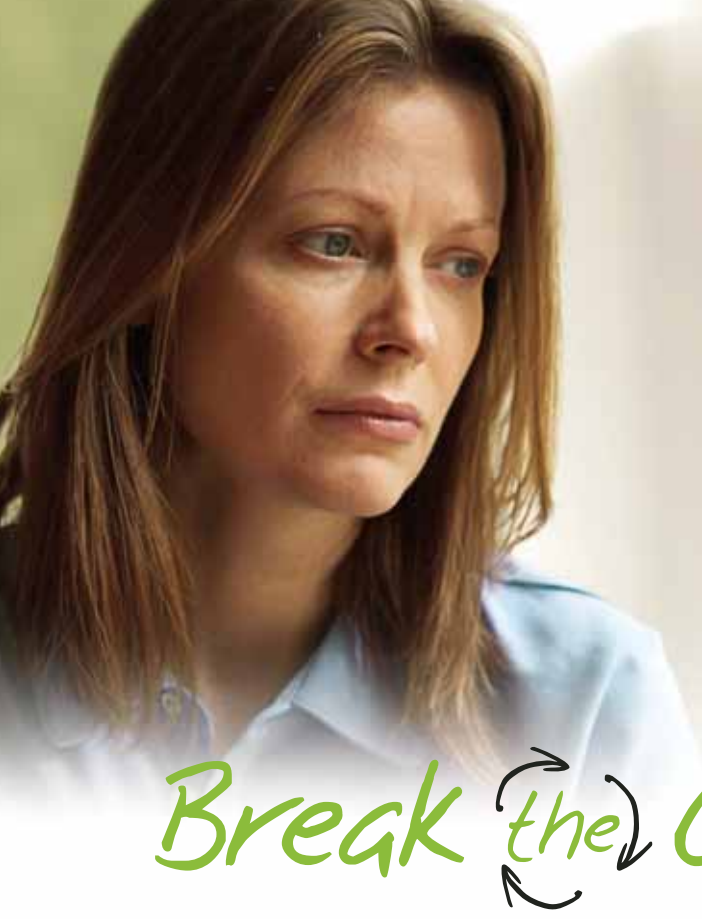

# Still depressed?

- ✓ Anxiety, insomnia, low energy
- ✓ Currently on an SSRI
- ✓ Still suffering

It may be time to make a change

## Break *the* Cycle with EFFEXOR XR

### IMPORTANT TREATMENT CONSIDERATIONS

#### Suicidality in Children and Adolescents

Antidepressants increased the risk of suicidal thinking and behavior (suicidality) in short-term studies in children and adolescents with Major Depressive Disorder (MDD) and other psychiatric disorders. Anyone considering the use of EFFEXOR XR or any other antidepressant in a child or adolescent must balance this risk with the clinical need. Patients who are started on therapy should be observed closely for clinical worsening, suicidality, or unusual changes in behavior. Families and caregivers should be advised of the need for close observation and communication with the prescriber. EFFEXOR XR is not approved for use in pediatric patients.

- EFFEXOR XR is contraindicated in patients taking monoamine oxidase inhibitors (MAOIs).
- Adult and pediatric patients taking antidepressants can experience worsening of their depression and/or the emergence of suicidality. **Patients should be observed closely for clinical worsening and suicidality, especially at the beginning of drug therapy, or at the time of increases or decreases in dose.** Anxiety, agitation, panic attacks, insomnia, irritability, hostility, aggressiveness, impulsivity, akathisia, hypomania, and mania have been reported and may represent precursors to emerging suicidality. Stopping or modifying therapy should be considered especially when symptoms are severe, abrupt in onset, or not part of presenting symptoms.

- The development of potentially life-threatening serotonin syndrome may occur when EFFEXOR XR is coadministered with other drugs that may affect the serotonergic neurotransmitter systems. Concomitant use of EFFEXOR XR with MAOIs is contraindicated. If concomitant use of EFFEXOR XR with an SSRI, SNRI, or a triptan is clinically warranted, careful observation of the patient is advised. Concomitant use of EFFEXOR XR with tryptophan supplements is not recommended.
- Treatment with venlafaxine is associated with sustained increases in blood pressure (BP) in some patients. Postmarketing cases of elevated BP requiring immediate treatment have been reported. Pre-existing hypertension should be controlled. Regular BP monitoring is recommended.
- Mydriasis has been reported in association with venlafaxine; therefore, patients with raised intraocular pressure or those at risk of acute narrow-angle glaucoma (angle-closure glaucoma) should be monitored.
- Abrupt discontinuation or dose reduction has been associated with discontinuation symptoms. Patients should be counseled on possible discontinuation symptoms and monitored while discontinuing the drug; the dose should be tapered gradually.

ONCE-DAILY  
VENLAFAXINE HCl  
**EFFEXOR XR**® EXTENDED  
RELEASE  
CAPSULES

*The change they deserve.*

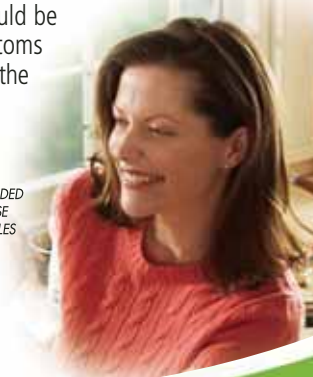

Please see brief summary of Prescribing Information on adjacent pages.
