# THE AMERICAN JOURNAL OF PSYCHIATRY

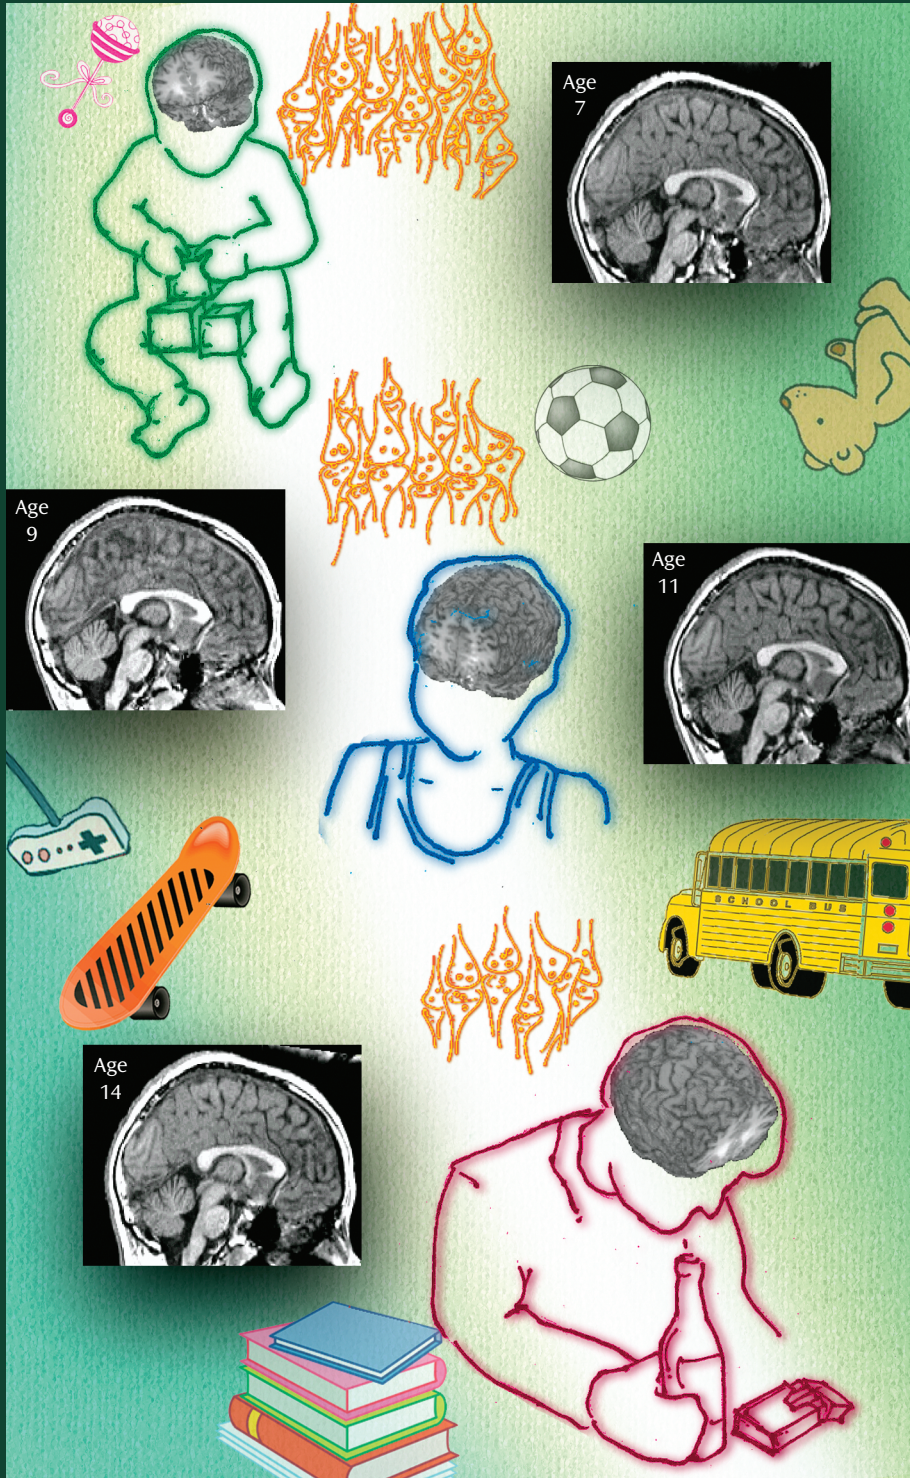

**Lifting the Veil on Trichotillomania**  
Samuel R. Chamberlain et al. 568

**Twelve-Month Outcome of  
Adolescents With Bipolar Disorder  
Following First Hospitalization for  
a Manic or Mixed Episode**  
Melissa P. DelBello et al. 582

**A Randomized Controlled Trial of  
Family Therapy and Cognitive  
Behavior Therapy Guided Self-Care for  
Adolescents With Bulimia Nervosa  
or Related Disorders**  
Ulrike Schmidt et al. 591

**Cerebellar Development and Clinical  
Outcome in Attention Deficit  
Hyperactivity Disorder**  
Susan Mackie et al. 647

**Continuing Medical Education** 690

**April 2007**

**Volume 164 • Number 4**

Official Journal of the  
AMERICAN PSYCHIATRIC ASSOCIATION

[ajp.psychiatryonline.org](http://ajp.psychiatryonline.org)
